# Supplementary material for: Differential Deployment of REST and CoREST Promotes Glial Subtype Specification and Oligodendrocyte Lineage Maturation
Source: PLoS One. 2009 Nov 3;4(11):e7665. doi: 10.1371/journal.pone.0007665 (PMC2766030; doi:10.1371/journal.pone.0007665)
Supplement: Table S1 — Composite profiles of REST and CoREST target genes in glial developmental cell types. For the ChIP-chip data, the value 1 denotes gene promoter occupancy. For the gene expression data, the value represents the expression in the cell type relative to expression in neural stem cells. The Robust Multi-Array Average (RMA) algorithm and significant analysis of microarray methods (SAM) were used to analyze the expression data. Three biological replicates were conducted for each cell type. (2.14 MB XLS) [file pone.0007665.s001.xls]

## Sheet: Revised
		ChIP-chip										GENE EXPRESSION RELATIVE TO NSCs = Log(fold change)
Official Gene Symbol	RE1	OLpres REST	OLpros REST	pmOLs REST	myOLs REST	ASs REST	OLpres COREST	OLpros COREST	pmOLs COREST	myOLs COREST	ASs COREST	OLpres	OLpros	pmOLs	myOLs	ASs
Zzz3	YES	0	0	1	0	0	0	0	0	0	0	-0.7173	0.1213	0.2557	-0.287767	-0.4303
Zyg11bl		0	0	0	1	0	0	0	1	0	0	0.7368	0.0388	-0.1932	0.664333	0.6286
Zxdc	YES	0	0	1	0	0	0	0	0	0	0	0.100367	-0.114233	-0.722033	-0.286867	-0.807433
Zswim5	YES	0	0	0	0	0	0	1	0	0	0	1.0924	0.675633	-0.140033	-0.843867	0.1885
Zswim3		0	0	1	0	0	0	0	0	1	0	0.2483	-0.136933	-0.771533	0.1042	-0.470667
Zpld1		0	1	0	0	0	1	0	0	0	0	-0.0331	0.1493	-0.0326	-0.0203333	0.184333
Zpbp	YES	0	0	0	0	0	0	1	0	0	0	-0.1482	0.110267	0.104167	-0.225633	0.00713333
Zp3r	YES	0	0	0	0	0	1	1	0	0	0	0.390333	0.3425	0.210933	0.291033	0.4939
Zp2		0	0	1	0	0	0	0	0	0	0	0.185733	0.181333	0.0560333	-0.112267	0.096
Zp1		0	0	0	0	0	0	0	0	1	0	-0.0488333	-0.0809667	-0.176933	-0.146867	-0.115933
Znrf2		0	1	0	1	0	0	0	0	0	0	-0.452733	0.0176	-0.628167	-0.6918	-1.0125
Zmynd19	YES	0	0	1	0	0	0	0	0	0	0	-0.770033	-0.9611	-1.00623	-1.67943	-0.815933
Zmat5	YES	0	0	0	0	0	0	0	0	0	1	-0.0301667	-0.2422	-0.8521	-0.4296	-0.566367
Zim1	YES	0	0	0	0	0	1	0	0	0	0	-0.5355	-0.0583333	-0.4453	-0.360167	-0.1596
Zic5		0	1	0	0	0	0	0	0	0	0	-0.631667	-0.747	-1.11037	-0.715333	-0.261
Zic2		0	0	0	1	0	0	0	0	1	0	-0.315967	-1.0155	-1.4304	-0.646033	0.0770333
Zhx3		0	0	0	0	0	0	0	0	1	0	0.2447	-0.547533	-0.621833	0.398133	-0.591633
Zhx2	YES	0	0	0	0	0	0	0	1	1	0	0.3118	0.215033	0.03	0.5497	0.4318
Zfyve27	YES	0	0	0	1	0	0	0	1	0	0	0.325167	0.8842	0.530033	0.895433	0.9714
Zfyve19	YES	0	0	0	0	0	0	0	0	1	0	0.258233	-0.171867	-0.876567	0.0282	-0.178533
Zfyve1		0	0	1	0	0	0	0	1	0	0	0.602533	0.200333	0.0804	0.581	0.584667
Zfx	YES	0	1	0	0	0	0	1	0	0	0	-0.608	0.447	0.4273	-0.2109	-0.4402
Zfr		0	0	1	0	0	0	0	1	0	0	-0.4601	0.282967	0.554933	0.400967	-0.561067
Zfpn1a2		0	1	0	0	0	0	0	0	0	0	-0.506733	-0.0496333	-0.366467	-0.0236333	-0.260667
Zfpn1a1		0	1	0	0	0	0	0	0	0	0	0.283967	0.501333	0.613433	0.279333	0.729967
Zfpm2		0	0	0	0	0	0	0	0	1	0	-0.242967	0.3552	-0.493833	-0.816533	-0.930133
Zfp91		0	0	1	0	0	0	0	0	0	0	-1.00163	-0.509967	1.06407	2.4158	2.33473
Zfp90		0	0	0	0	0	1	0	0	0	0	-0.0638667	0.356333	-0.3685	-0.2608	0.117133
Zfp82	YES	0	0	1	0	0	0	0	0	1	0	-0.166133	-0.0329333	-0.5251	-0.0908	-0.663467
Zfp78	YES	0	0	1	0	0	0	0	0	0	0	0.173967	-0.0145	0.0865	0.0541333	0.0345667
Zfp7		0	0	0	0	0	1	0	0	0	0	-0.201433	-0.364833	-1.1219	-0.739533	-1.0483
Zfp697		0	0	0	0	0	0	0	1	0	0	-0.0425	0.135233	-0.459	-0.739267	-0.583333
Zfp68	YES	1	0	1	0	1	0	0	1	0	0	-0.613567	0.499067	0.144967	-0.689633	-1.01357
Zfp672	YES	0	0	1	0	0	0	0	0	0	0	0.3166	0.180833	-0.0795	-0.334767	0.0571667
Zfp661	YES	0	0	1	0	0	0	0	0	0	0	0.1124	0.464533	-0.104867	0.0314667	-0.267733
Zfp644		0	0	0	1	0	0	0	1	1	0	-0.735333	0.8262	0.2794	-0.938933	-0.919
Zfp639		0	0	1	0	0	0	0	0	0	0	-0.366033	-0.123	-0.365733	-0.1974	-0.602933
Zfp637		0	0	1	0	0	0	0	0	0	0	0.283233	0.308967	-0.0423667	-0.104233	0.2648
Zfp612		1	0	0	0	0	0	0	0	0	0	-0.6008	-0.3468	-1.24603	-0.843767	-0.946767
Zfp60	YES	0	0	0	0	0	1	0	0	0	0	-0.125233	1.00113	1.3949	-0.00423333	-0.246367
Zfp592	YES	0	0	0	1	0	0	0	1	1	0	0.249867	-0.4569	-0.8636	0.1403	-0.2602
Zfp59		0	0	0	0	0	1	0	0	0	0	0.0584333	0.4606	0.5881	-0.0202333	0.3713
Zfp583		0	0	0	0	0	0	0	1	0	0	-0.3034	0.599833	0.161367	-0.293267	-0.268333
Zfp523	YES	0	0	0	1	1	0	0	0	0	0	0.102233	-0.3595	-1.2333	-0.1876	-0.1821
Zfp521	YES	0	0	1	0	0	0	0	0	0	0	0.3918	0.513667	0.794067	0.2541	-0.320767
Zfp513	YES	0	0	1	0	0	0	0	0	0	0	0.235733	-0.506	-0.570367	0.0563333	-0.1293
Zfp496		0	0	0	0	0	0	0	0	1	0	0.251333	-0.4865	-0.8774	-0.755367	-0.307333
Zfp488		0	0	0	1	0	0	0	0	0	0	1.28883	1.70597	1.99197	1.18617	0.698233
Zfp482	YES	0	0	0	0	0	0	1	0	0	0	-0.2932	0.0305667	-0.227767	-0.351867	-0.934833
Zfp472		0	0	1	0	0	0	0	0	0	0	-0.641267	0.1321	-0.571333	-0.821267	-0.601067
Zfp451	YES	0	0	0	0	0	0	0	1	0	0	-0.5039	0.0429	0.0129333	-0.451333	-0.5275
Zfp444		0	0	1	0	0	0	0	0	0	0	0.561567	0.0877667	-0.4463	0.437233	-0.0638333
Zfp422-rs1		0	0	0	0	0	1	0	0	0	0	-0.7735	0.665733	0.402867	-0.8717	-0.804067
Zfp398		0	0	0	0	0	0	1	0	0	0	0.4842	-0.266667	-0.329133	0.667533	-0.3807
Zfp397		0	0	0	0	0	1	0	0	0	0	-0.576833	0.608967	0.338433	-0.326967	-0.701433
Zfp393		0	0	0	1	0	0	0	0	0	0	0.148333	0.1858	0.212967	-0.0271333	0.168433
Zfp37	YES	0	0	0	0	0	0	0	1	1	0	-0.253767	1.05317	0.787533	-0.3967	-0.394933
Zfp36l3		0	0	0	0	0	1	0	0	0	0	0.0163667	-0.0068	-0.317633	-0.1934	-0.104133
Zfp36l2	YES	0	0	0	0	0	0	0	1	0	0	-0.279867	-0.124533	0.4249	-0.619733	-0.123233
Zfp367		0	0	0	0	0	0	1	0	0	0	-0.9408	-0.232233	-0.7291	-0.9042	-0.8223
Zfp365		0	1	0	0	0	0	1	0	0	0	0.230767	0.845533	0.6081	-0.3426	-0.5832
Zfp364		0	0	0	0	0	0	1	0	0	0	-0.269667	0.503233	0.480433	-0.279933	-0.286567
Zfp358	YES	0	0	0	0	0	0	0	1	1	0	0.697133	0.0437	-1.01203	-0.445933	0.1149
Zfp354a	YES	0	0	0	0	0	0	0	1	0	0	-0.400667	0.266267	-0.0605667	-0.584167	-0.704567
Zfp353		0	0	0	0	0	1	0	0	0	0	2.0006	1.96453	4.30103	1.06327	2.70993
Zfp341		0	0	0	0	0	1	0	0	0	0	-0.0735333	-0.3275	-0.912	-0.4333	-0.7166
Zfp336		0	0	1	0	0	0	0	0	0	0	-0.0194333	0.0781333	0.166867	-0.0686333	-0.190333
Zfp330		0	0	0	0	0	1	0	0	0	0	-0.320567	-0.00346667	-0.4565	-0.5997	-0.470367
Zfp329		0	0	0	0	0	0	0	1	0	0	-0.6241	1.05543	0.8043	-0.968167	-0.2413
Zfp297b		0	0	1	0	0	0	0	0	0	0	0.207733	0.2302	0.152533	0.0572333	0.139533
Zfp281	YES	1	0	0	0	0	0	0	0	0	0	-0.566933	0.281667	0.471867	-0.251433	-0.648467
Zfp263	YES	0	0	0	0	0	0	0	1	0	0	-0.0343667	0.212533	-0.110267	-0.671733	-0.178867
Zfp260	YES	0	0	1	0	0	0	0	0	0	0	-0.3915	0.572867	0.556267	-0.5649	-0.5835
Zfp248		0	0	0	0	0	1	0	0	0	0	-0.3063	0.116	-0.117433	-0.378667	-0.6251
Zfp239		0	0	0	0	0	0	1	0	0	0	-0.158967	0.199367	-0.325967	-0.468233	-1.0926
Zfp238	YES	0	1	0	0	1	0	0	1	0	0	-0.5635	0.7229	0.135667	-0.628833	0.160233
Zfp218		0	0	0	1	0	0	0	0	1	0	-0.584367	-0.861867	-1.04807	-1.55913	-1.02597
Zfp217		0	0	0	0	0	1	0	0	0	0	-0.621533	-0.6852	-0.778033	-0.2732	-0.714
Zfp212		0	0	0	0	0	0	0	1	0	0	0.3632	0.0127333	-0.379	-0.1502	0.251033
Zfp198		0	0	0	1	0	0	0	0	0	0	-0.348833	0.615267	0.588933	-0.343333	-0.793833
Zfp191		0	0	0	1	0	0	0	0	1	0	-0.6145	0.1514	0.205967	-0.848333	-0.5711
Zfp189		0	1	0	0	0	0	0	0	0	0	-0.4928	0.268567	0.236267	-0.4326	-0.749033
Zfp180	YES	0	0	1	0	0	0	0	0	0	0	-0.335433	0.108467	-0.636733	-0.830633	-0.710667
Zfp161	YES	0	0	0	1	0	0	0	0	0	0	-0.1637	0.377333	0.3096	-0.678367	-0.164867
Zfp160		0	1	0	0	0	0	0	0	0	0	-1.0352	0.6828	0.5469	-0.774167	-0.994467
Zfp148		0	0	0	1	0	0	0	0	0	0	-0.7019	0.184033	-0.436367	-0.579733	-0.898433
Zfp14		0	0	1	0	0	0	0	0	0	0	-0.280167	0.2968	-0.446767	-0.149033	-0.3198
Zfp128		0	0	0	1	0	0	0	0	0	0	0.182033	0.4939	0.4047	-0.195933	-0.00236667
Zfp12		0	0	1	1	0	0	0	0	1	0	0.4026	0.3656	0.145167	-0.0798667	0.2099
Zfp106	YES	0	1	1	0	0	0	1	0	0	0	-0.5092	-0.931767	-0.652367	0.5783	-0.839833
Zfhx2		0	0	1	0	0	0	0	1	1	0	-0.1355	-0.2338	-0.9601	-0.0913333	-0.447967
Zfand3	YES	0	0	0	1	0	0	0	1	1	0	0.626133	0.274333	0.1699	0.7835	0.672767
Zf		0	1	0	0	0	0	1	0	0	0	-0.5899	-0.152933	0.463367	-0.191333	-0.216867
Zdhhc5		0	0	0	0	0	0	1	1	0	0	-0.4151	-0.507267	-0.5435	-0.981733	-0.834767
Zdhhc20	YES	0	0	0	0	0	0	1	0	0	0	-0.997167	-0.0268	-0.2196	-1.32237	-1.01567
Zdhhc2		0	0	0	1	0	0	0	1	1	0	-0.3224	0.347867	0.528967	-0.1074	-1.4376
Zdhhc19		0	0	0	0	0	1	0	0	0	1	0.0208	-0.1131	-0.0109	0.267267	-0.0379333
Zdhhc17	YES	0	0	0	0	0	0	1	0	0	0	-0.616633	0.351167	0.0365	0.217	-0.7625
Zdhhc15		0	0	0	0	0	1	0	0	0	1	-0.671133	-0.261467	-0.5715	-0.851367	-0.9214
Zdhhc12		0	0	1	0	0	0	0	0	0	0	0.119367	-0.200467	-0.204967	0.495	0.116267
Zcchc9	YES	0	0	0	1	0	0	0	1	0	0	-0.104233	0.481567	0.559833	-0.247067	-0.163067
Zcchc8		0	0	0	0	0	0	1	0	0	0	-0.289867	-0.345633	-0.893267	-0.885367	-0.4014
Zcchc5	YES	0	0	0	0	0	0	1	0	0	0	0.2454	0.212167	0.208933	0.2783	0.2841
Zc3h8		0	1	0	0	0	0	0	0	0	0	-0.756267	-0.0867667	-0.772	-0.9892	-0.845633
Zc3h6		0	0	0	0	0	0	1	0	0	0	-0.545633	-0.042	-0.585967	0.1177	-0.829233
Zc3h11a		0	0	0	0	0	0	1	0	0	0	-0.5408	0.275067	-0.2361	-0.571033	-0.328433
Zc3h10	YES	0	0	1	0	0	0	0	0	0	0	0.227133	-0.5558	-1.06307	-0.0882	-0.619
Zbtb9		0	0	0	0	0	0	0	1	1	0	0.536533	-0.0804	-0.1327	-0.0118333	0.2873
Zbtb44		0	0	1	0	0	0	1	0	0	0	-0.0123667	0.190233	0.0204667	-0.3344	-0.2698
Zbtb41		0	1	0	0	0	1	0	0	0	0	-0.9664	0.462967	0.634733	-0.419867	-0.918433
Zbtb38		0	0	1	0	1	0	0	0	0	1	0.0215667	0.0434667	-0.412233	0.2617	-0.346767
Zbed4		0	0	0	0	0	0	1	0	0	0	0.0474333	0.393267	0.373367	-1.0992	0.439
Zadh2		0	1	0	0	0	0	0	0	0	0	-0.457633	-0.284333	0.405267	-0.0776333	0.1752
Za20d2		0	0	0	1	0	0	1	0	1	0	-0.330033	1.18687	1.14087	0.0131333	0.129867
Ywhaq	YES	0	0	1	0	0	0	0	1	0	0	-0.0989	0.3294	0.793133	0.4634	-0.131867
Ywhag		0	0	1	0	0	0	0	0	0	0	0.270833	0.478833	-0.246567	-0.0594667	-0.2603
Ythdf1	YES	0	1	0	0	0	0	0	0	0	0	0.143033	0.348967	0.202033	-0.551167	0.0417667
Yrdc	YES	0	1	0	0	0	0	1	0	0	0	-0.226667	-0.489633	-1.25437	-0.565	-0.689967
Ypel4		0	0	0	0	0	0	0	1	1	0	0.437467	0.409533	-0.351	0.995633	0.3693
Yipf4		0	1	0	0	0	1	0	0	0	0	-0.392667	0.214767	-0.106167	-0.495967	-0.2971
Yipf3		0	0	1	0	0	0	0	0	0	0	0.752467	-0.1928	-0.257233	1.1176	0.447233
Yes1		0	0	0	0	0	0	0	1	0	0	-1.34947	0.7785	1.22007	-0.819533	-1.05223
Yeats4		0	0	1	0	0	0	0	0	0	0	-0.155567	0.2378	-0.376533	-1.11967	-0.0426333
Yeats2		0	0	0	0	0	0	1	0	0	0	0.0037	-0.0735667	-0.177967	-0.5622	-0.0167333
Yars2		0	0	1	0	0	0	0	0	0	0	-0.921367	-0.830433	-1.1592	-1.1242	-1.25123
Yars		0	0	0	0	0	0	0	1	0	1	0.0569	-0.359867	-0.759967	-0.130033	-0.420567
Yaf2	YES	0	1	0	0	0	1	0	0	0	0	-0.573267	0.429733	-0.00393333	-0.805833	-0.593867
Xylt1	YES	0	0	1	1	0	0	0	0	1	0	0.0342667	-2.07173	-2.3881	-0.9399	-2.30753
Xrcc6	YES	0	0	1	0	0	0	0	1	0	0	-0.3513	-0.915167	-1.07053	-0.669533	-0.891033
Xpr1		0	0	1	0	0	0	0	1	1	0	-0.487733	0.847967	0.710933	0.2002	0.2678
Xpo5	YES	0	0	1	1	0	0	0	0	0	0	0.0615667	-0.684867	-0.8557	0.185467	-0.291833
Xpnpep2	YES	0	1	0	0	0	0	0	0	0	0	0.137533	-0.0374	0.288	0.0707	-0.0386333
Xpa	YES	0	0	1	0	0	0	0	0	0	0	-0.121867	1.17937	0.7076	-0.5921	0.0462333
Xmr		0	0	0	0	0	1	0	0	0	1	1.21213	1.5412	2.98703	0.902833	2.45667
Xlr3a		1	0	0	0	0	0	0	0	0	0	0.100567	0.722467	0.4012	-0.192267	0.727233
Xlr		1	0	0	0	1	1	0	0	0	1	-0.115867	0.261967	0.280233	-0.2511	0.355533
Xkr9		0	0	0	0	0	0	1	0	1	0	0.251367	0.1398	0.3194	0.0261333	0.251267
Xkr8		0	0	0	0	0	0	0	0	1	0	0.0924667	-0.107667	0.126767	0.0945	-0.0389333
Xkr4	YES	0	0	0	1	0	0	0	0	1	0	-0.793933	-0.169933	-0.8534	0.133033	-0.332933
Xkh	YES	0	0	0	1	0	0	0	0	0	0	-0.916833	-0.127767	-0.190567	-0.8174	-0.863333
Xcr1		0	0	1	0	0	0	0	0	0	0	0.291333	0.263033	0.6068	0.863733	0.7355
Wt1	YES	0	0	1	0	0	0	0	0	0	0	0.119567	0.0795667	0.0717333	-0.00616667	-0.0298333
Wsb2		0	0	1	0	0	0	0	0	0	0	0.135633	-0.190867	-0.7912	-0.363667	-0.416867
Wsb1		0	0	0	0	0	0	0	0	0	1	-0.4217	1.6686	0.876567	-0.220967	0.529033
Wrnip1	YES	0	1	1	0	0	0	0	0	0	0	-0.564967	-0.6241	-0.935333	-0.464	-0.542333
Wrb		0	0	1	0	0	0	0	0	0	0	0.136533	-0.2051	-0.195267	-0.1967	0.0404333
Wnt9a		0	0	0	1	0	0	1	1	1	0	0.182167	-0.0069	0.571	2.20837	1.3872
Wnt5a	YES	0	0	0	1	0	0	0	0	1	0	-0.343633	0.0102	1.4519	0.218167	0.178933
Wnt3	YES	0	0	1	0	0	0	0	0	1	0	-0.0956667	0.0336667	0.186333	0.448167	-0.638567
Wnt2b		0	0	0	0	0	0	0	1	0	0	-0.115267	-0.0334	-0.0540333	0.1997	0.287733
Wnt10b		0	0	0	1	0	0	0	1	1	0	0.0435	0.0103667	0.0780333	-0.188233	0.0803333
Wiz	YES	0	0	0	0	0	1	0	0	0	0	0.691767	-0.351	-0.9662	-0.0759333	0.129667
Wisp1		0	0	0	1	0	0	0	0	0	0	-0.354067	-0.322867	-0.303967	-0.173967	0.0158333
Wipi2	YES	0	1	1	0	0	1	0	0	0	0	0.667833	0.216733	0.4054	1.28747	1.34453
Wif1	YES	0	0	0	0	0	0	0	0	1	0	-0.1526	-0.387767	-0.410833	-0.689367	-0.4164
Wfikkn2	YES	0	0	0	1	0	0	0	0	1	0	-0.009	-0.217333	-0.0071	0.0348	0.0373333
Wfdc2		0	0	0	0	0	1	0	0	0	0	-0.658567	-0.683333	-0.295833	-0.7779	-0.505033
Wfdc15	YES	0	0	0	0	0	1	0	0	0	0	0.1985	0.172	0.3768	0.170667	0.231367
Wfdc13		0	0	0	0	0	0	0	1	1	0	0.0713333	0.0159667	0.1193	-0.0187	0.0932
Wdsub1		0	0	1	0	0	0	0	1	0	0	-0.3136	-0.565833	-0.6626	0.0063	-0.2317
Wdr72	YES	0	0	0	1	0	0	0	0	0	0	0.0387	0.0740667	-0.0511667	-0.148633	0.0683667
Wdr68	YES	0	0	0	0	1	1	0	0	0	1	0.434033	0.225367	0.0337667	0.3135	0.0525333
Wdr61		0	0	0	1	0	0	0	0	1	0	-0.433033	0.00223333	-0.163367	-0.2263	-0.4364
Wdr53	YES	0	0	0	0	0	0	1	0	0	0	-0.0218	0.166767	0.0403333	0.0869	0.2585
Wdr51b	YES	0	0	0	0	1	0	0	0	0	0	-0.4066	-0.0892667	-0.122433	-1.3077	-0.369467
Wdr50	YES	0	0	1	1	0	0	0	0	0	0	-0.6353	-0.141767	-0.0781333	-0.6808	-0.793433
Wdr5	YES	0	0	0	1	0	0	0	0	0	0	0.0197	-0.44	-1.00267	-0.637533	-0.3885
Wdr45l	YES	0	0	0	1	0	0	0	1	1	0	0.3107	-0.1096	-0.299167	0.144133	0.3418
Wdr45		0	0	0	0	0	0	0	0	0	1	0.865133	0.654167	0.287633	0.845367	1.39673
Wdr42a	YES	0	1	0	0	0	0	0	0	0	0	0.445567	0.0752667	-0.124633	0.4965	0.606033
Wdr35		0	0	1	0	0	0	0	0	0	0	-0.428433	-0.890033	-0.6832	-0.126433	-0.469233
Wdr31	YES	0	0	0	0	0	0	0	0	1	0	-0.254	-0.3884	-0.788833	0.0392333	-0.271367
Wdr22	YES	0	0	0	0	0	0	0	0	1	0	0.4246	0.3388	0.161667	0.584333	0.202367
Wdr20	YES	0	1	0	0	0	0	0	0	0	0	-0.0529	-0.0686	0.0119667	0.3218	0.327633
Wdr18		0	0	1	0	0	0	0	0	0	0	-0.1764	-0.601667	-1.062	-0.223367	-0.444033
Wdr17		0	0	0	0	0	0	1	0	0	0	-0.664267	0.228067	-0.7726	-0.750333	-1.24753
Wdr13		0	0	1	0	0	0	0	0	0	0	-0.312767	0.655367	0.319167	0.5661	-0.119533
Wdr1	YES	0	0	0	1	0	0	0	1	1	0	0.6323	0.192833	0.375833	0.977733	1.17173
Wdfy3	YES	0	0	1	1	0	0	0	1	1	0	-0.0635667	-0.299967	-0.674	0.195133	-0.0156667
Wbscr18	YES	0	0	0	0	1	1	0	1	0	1	0.2878	0.0991667	-0.780533	-0.349067	0.0605
Wbscr1	YES	0	0	0	1	0	0	0	0	1	0	0.0412667	-0.276733	-0.715933	-0.571633	-0.0497
Wbp2	YES	0	0	1	0	0	0	0	1	0	0	0.925533	0.301433	-0.134033	1.07293	0.765567
Waspip		0	1	0	0	0	1	0	0	0	0	-0.239733	0.199167	0.522433	-0.115433	-0.441167
Wasf3	YES	0	0	0	0	0	1	0	0	0	0	-0.0001	-0.657533	-1.104	0.533533	-1.07653
Wars2	YES	0	0	1	0	1	1	0	0	0	0	-0.3212	-0.4004	-0.0375333	-0.361633	-0.423767
Vti1a	YES	0	0	0	0	0	0	1	0	0	0	0.238333	0.0585	0.3268	0.684867	0.158967
Vsnl1		0	1	0	0	1	0	0	0	0	0	-0.455733	0.5759	-1.4814	-0.725933	-1.74697
Vsig2		0	0	0	1	0	0	0	0	0	0	-0.000366667	-0.0749667	-0.177633	-0.0113667	-0.0402333
Vrk3	YES	0	0	0	0	0	1	0	0	0	0	0.3003	0.0438	-0.3382	-0.1017	0.133433
Vps72		0	0	1	0	0	0	0	0	0	0	0.5175	0.0735333	-0.922167	-0.4703	0.293033
Vps53	YES	0	1	0	0	0	0	0	0	0	0	0.548733	0.2059	0.208633	0.757533	0.481167
Vps52	YES	0	0	1	0	0	0	0	1	0	0	0.262733	-0.1977	-0.268133	0.0668667	-0.0898333
Vps4b		0	0	0	0	0	0	0	1	0	0	-0.7743	-0.0572667	-0.255	-0.495133	-0.535433
Vps4a		0	0	1	0	0	0	0	0	0	0	0.493967	0.2593	0.1087	0.808467	0.168633
Vps41		0	1	0	0	0	0	0	0	0	0	-0.224233	0.737367	0.999867	0.3569	0.192833
Vps39		0	0	0	0	0	0	0	1	1	0	0.512067	0.0627667	-0.414433	0.822767	0.1421
Vps29	YES	1	0	0	0	0	1	0	0	0	0	-0.269633	0.146167	-0.0740333	-0.0937333	-0.373433
Vps24	YES	0	0	0	0	1	0	0	0	0	0	0.0269	-0.0382667	0.0523667	0.4829	-0.0933667
Vps16	YES	0	0	1	0	0	0	0	0	1	0	-0.120633	-0.747	-0.886167	0.0699667	-0.2686
Vmp	YES	0	0	0	1	0	0	0	0	0	0	0.614033	0.546033	-0.679167	-0.0713667	-0.714467
Vmo1		0	0	0	0	0	1	0	0	0	0	0.0430333	-0.135767	0.383933	0.0854	0.0875667
Vmd2l3	YES	0	0	0	0	0	1	0	0	0	0	0.173867	0.111867	0.2779	0.0515	0.230333
Vmd2l1	YES	0	0	1	0	0	0	0	1	0	0	0.0692	0.105733	0.0594	0.0782	-0.0465
Vkorc1l1		0	0	0	0	0	0	0	1	1	0	-0.205433	-0.4173	-0.4579	-0.2526	-0.358567
Vipr1		0	0	0	1	0	0	0	0	1	0	-0.1138	-0.304333	-0.208567	-0.1589	-0.0216
Vip	YES	0	1	0	1	0	0	1	0	0	0	0.222033	0.208433	0.402833	0.411133	0.2435
Vim	YES	0	0	1	0	0	0	0	0	0	0	-0.745867	-1.6386	0.710233	1.4713	0.693433
Vil2	YES	0	0	1	0	0	0	0	0	0	0	0.0648	-0.15	0.271233	0.7838	0.589
Vgll2		0	1	0	0	0	0	0	0	0	0	0.609067	1.2405	0.8498	-0.0109	0.945333
Vgll1		0	0	0	0	0	0	1	0	0	0	0.0618667	-0.104267	-0.189067	0.105733	0.1592
Vgf		0	1	1	1	0	0	0	1	1	0	0.0125667	-1.46697	-1.5965	0.306133	-1.60263
Vgcnl1		0	0	0	0	0	0	1	1	1	0	0.658367	0.599467	0.2143	1.0452	-0.404833
Veph1	YES	0	0	1	0	0	1	0	0	0	0	-0.695333	-0.711033	-1.89907	-1.1754	-1.40157
Vdp	YES	0	0	1	0	0	0	0	0	0	0	-0.1968	0.177533	0.4722	0.494167	-0.0998667
Vcam1		0	0	0	0	0	0	1	0	0	0	0.6282	1.6771	2.85163	2.31857	1.4237
Vav3	YES	0	1	0	0	0	1	1	0	0	0	-1.62963	-1.2059	-1.18223	-2.23287	-1.37567
Vav2	YES	0	0	0	0	0	0	0	0	1	0	0.192	-0.270767	-0.939467	0.2035	-0.145467
Vapb		0	0	0	0	0	1	0	0	0	1	0.334967	0.3662	0.513633	0.211967	0.211333
V2r4		1	0	0	0	1	1	0	0	0	1	1.08867	1.14733	2.30703	0.9367	2.11653
V2r1b		0	0	0	0	0	1	0	0	0	0	0.438333	0.360367	0.6584	0.410367	0.600967
V2r16	YES	0	0	0	0	0	1	0	0	0	0	0.2328	0.1304	0.4685	0.0416667	0.590733
V2r15		1	1	0	0	1	1	0	0	0	1	1.03967	1.15277	2.21207	0.8835	2.06023
V2r14	YES	0	0	0	0	1	1	0	0	0	1	0.727433	1.022	2.02397	0.793433	1.99903
V2r11	YES	1	1	0	0	0	1	0	0	0	0	0.2456	0.249633	0.507667	0.213167	0.394267
V1rj3		0	1	0	0	0	0	1	0	0	0	0.3103	0.5425	0.4254	0.12	0.483367
V1ri9		0	0	0	0	1	0	0	0	0	0	0.895467	0.990567	1.97317	0.665067	1.64673
V1ri8		0	0	0	0	0	1	0	0	0	0	0.373067	0.544333	1.0277	0.375567	1.084
V1ri5		0	0	0	0	0	1	0	0	0	0	0.5471	0.5965	1.22883	0.4933	0.822867
V1ri1		0	0	0	0	0	1	0	0	0	0	0.487467	0.3585	0.696433	0.407933	0.443867
V1rh9		0	0	0	0	0	1	0	0	0	0	0.511967	0.6426	1.26333	0.534933	1.054
V1rh8		0	0	0	0	1	1	0	0	0	0	0.776533	0.653667	1.5849	0.446	1.0944
V1rh7		0	0	0	0	0	1	0	0	0	0	0.862667	0.783267	1.47227	0.559933	1.27133
V1rh4		1	0	0	0	0	1	0	0	0	0	0.530867	0.513767	1.07333	0.4945	0.9841
V1rh3		1	0	0	0	0	1	0	0	0	0	0.2993	0.143467	0.0962333	0.157333	0.0880333
V1rh2		0	0	0	0	1	1	0	0	0	1	0.8118	1.0015	1.98297	0.580233	1.72807
V1rh14		0	0	0	0	0	1	0	0	0	0	0.0647667	0.332867	0.585967	0.0941667	0.417233
V1rh13		0	0	0	0	0	1	0	0	0	0	0.159767	0.0376333	0.0287667	-0.265667	0.0506333
V1rh12		1	0	0	0	1	1	0	0	0	1	0.235867	0.338633	0.4515	0.126933	0.485267
V1rh11		0	0	0	0	0	1	0	0	0	0	0.370567	0.4299	0.583067	0.135733	0.269433
V1rh10		0	0	0	0	0	1	0	0	0	0	0.3477	0.399033	0.7825	0.3194	0.4291
V1rg8		0	0	0	0	1	1	0	0	0	0	0.2915	0.186233	0.580167	0.0931333	0.942967
V1rg7		0	0	0	0	0	1	0	0	0	0	0.424433	0.442933	0.658967	0.1991	0.665833
V1rg6		1	0	0	0	0	0	1	0	0	0	0.202233	0.278733	0.1916	0.232933	0.650433
V1rg4		0	0	0	0	0	0	1	0	0	0	0.409533	0.722633	0.965633	0.357967	1.02693
V1rg12		0	0	0	0	0	1	0	0	0	0	0.452967	0.6315	0.500133	0.404667	0.808333
V1rg10	YES	1	1	0	0	1	1	1	0	0	0	1.11753	1.6579	3.2115	0.8724	2.81607
V1rf3		0	0	0	0	0	1	0	0	0	0	0.299867	0.3704	0.386567	0.083	0.4446
V1rf1	YES	0	0	0	0	1	1	0	0	0	0	0.394767	0.526467	0.408033	0.265667	0.761567
V1re9	YES	0	1	0	0	0	1	1	0	0	0	0.351067	0.528367	0.468867	0.190933	0.438767
V1re7		0	1	0	0	0	0	1	0	0	0	0.4692	0.873233	1.01883	0.421067	1.75957
V1re4		0	0	0	0	0	1	0	0	0	0	0.1702	0.223833	0.3153	0.106233	0.350233
V1re3		0	1	0	0	0	1	0	0	0	0	0.182833	0.0987	0.168167	0.1105	0.2144
V1re2		0	0	0	0	0	1	0	0	0	0	0.271467	0.516467	0.518067	0.239333	0.594167
V1rd9		0	1	0	0	0	1	0	0	0	0	0.369933	0.6471	0.705033	0.345333	0.820333
V1rd7	YES	0	0	0	0	0	1	0	0	0	0	0.4762	0.674033	1.15937	0.3208	0.8223
V1rd4		0	0	0	0	0	1	1	0	0	0	0.686	0.784367	1.3524	0.422933	1.2846
V1rd3		0	0	0	0	0	1	0	0	0	0	0.475033	0.592167	1.09607	0.3149	0.601467
V1rd22		0	0	0	0	0	1	0	0	0	0	0.446633	0.675467	0.790333	0.3329	0.9215
V1rd21	YES	1	0	0	0	1	1	0	0	0	0	1.24863	1.8567	2.62913	0.856633	2.5562
V1rd20		0	0	0	0	0	0	1	0	0	0	0.591633	0.270767	0.395233	0.146433	0.254033
V1rd2		1	1	0	0	0	1	0	0	0	0	0.624867	0.5954	1.51043	0.543367	1.08887
V1rd18		0	0	0	1	0	0	0	0	0	1	0.445733	0.203267	0.388067	-0.0875	0.273633
V1rd17		0	0	0	0	1	1	0	0	0	0	0.2773	0.6328	0.529667	0.163267	0.820867
V1rd15		0	0	0	0	0	1	0	0	0	1	0.8488	0.871133	1.4793	0.461833	1.67063
V1rd14		1	1	0	0	1	1	0	0	0	1	1.3366	1.8105	2.60523	1.03517	2.4243
V1rd12		1	1	0	0	0	1	0	0	0	0	0.491467	0.8863	0.9402	0.507533	1.24133
V1rd11		0	0	0	0	0	1	0	0	0	0	0.609133	0.610233	1.21313	0.490967	0.9888
V1rd10		0	0	0	0	0	1	0	0	0	1	0.924033	0.9008	1.92883	0.839633	1.65853
V1rd1		0	0	0	0	0	1	0	0	0	0	0.9801	1.1715	1.9204	0.672833	1.51423
V1rc8		0	0	0	0	0	1	0	0	0	0	0.0603667	0.129467	0.0363	0.0928333	0.0818333
V1rc6	YES	0	0	0	0	0	0	1	0	0	0	0.238533	0.248467	0.690333	0.116	0.590367
V1rc33	YES	0	1	0	0	0	1	1	0	0	0	0.247567	0.0482333	0.1819	0.0670333	0.241767
V1rc32		0	0	0	0	1	1	0	0	0	0	0.2813	0.235833	0.869	0.0637	0.5187
V1rc30		0	1	0	0	0	1	0	0	0	0	0.590733	0.6285	1.42063	0.534433	1.5659
V1rc3		0	1	0	0	0	0	0	0	0	0	0.3996	0.295967	0.6107	0.309	0.6341
V1rc29	YES	0	1	0	0	0	1	0	0	0	0	0.2345	0.228667	0.694633	0.147733	0.4159
V1rc28	YES	1	0	0	0	0	1	0	0	0	1	0.1375	0.2188	0.455167	-0.0332	0.464933
V1rc27		0	1	0	0	0	1	0	0	0	0	0.263367	0.431167	0.5445	0.136667	0.5971
V1rc24		1	0	0	0	0	1	0	0	0	0	0.182633	0.209033	0.3589	0.00123333	0.272667
V1rc19		0	0	0	0	1	1	0	0	0	0	0.277333	0.1676	0.302033	0.100367	0.262367
V1rc18		0	0	0	0	1	1	0	0	0	1	0.475	0.2972	0.413867	0.2931	0.531967
V1rc16		1	0	0	0	0	0	0	0	0	0	0.243767	0.303767	0.2069	-0.202133	0.333367
V1rc15		0	0	0	0	1	1	0	0	0	0	-0.164167	-0.0632667	0.0158333	-0.2482	0.141867
V1rc14		0	1	0	0	1	0	0	0	0	0	0.0831	0.1083	0.202767	0.0696667	0.0694667
V1rc13		0	0	0	0	0	1	0	0	0	1	0.372767	0.3587	0.551333	0.335	0.5091
V1rc12		0	0	0	0	1	1	0	0	0	0	0.4866	0.843133	1.2683	0.452067	1.26613
V1rc11		0	1	0	0	1	1	0	0	0	0	0.287533	0.565567	1.2164	0.365967	1.21277
V1rc10		1	1	0	0	1	1	0	0	0	0	0.518767	0.812667	1.3606	0.535033	1.32797
V1rc1		0	1	0	0	0	1	0	0	0	1	0.4687	0.629	1.1025	0.4441	1.0845
V1rb9		0	0	0	0	0	1	0	0	0	0	0.427933	0.467767	1.02253	0.510367	1.3129
V1rb8	YES	0	0	0	0	0	1	0	0	0	0	0.282033	0.2684	0.400433	0.181167	0.224633
V1rb7		0	0	0	0	0	1	0	0	0	0	0.802333	1.24867	2.1036	0.422867	1.61843
V1rb3		0	0	0	0	0	1	0	0	0	1	0.414367	0.740333	1.10817	0.192567	0.744833
V1rb1		1	0	0	0	0	1	0	0	0	0	0.2844	0.3562	0.5455	0.206767	0.2282
V1ra8		0	0	0	0	1	0	0	0	0	0	0.431633	0.6155	1.13953	0.6418	0.9993
V1ra7		1	0	0	0	0	1	0	0	0	1	0.2558	0.206033	0.701567	0.0681	0.456633
V1ra6	YES	0	0	0	0	0	1	0	0	0	1	1.14973	1.2348	2.7543	0.797833	2.0928
V1ra5	YES	0	0	0	0	0	1	0	0	0	0	1.4754	1.40157	3.10607	1.0715	2.27603
V1ra4		0	1	0	0	0	1	0	0	0	0	0.44	0.623767	0.8937	0.505933	0.7772
V1ra3		0	0	0	0	0	1	0	0	0	0	1.8015	1.8892	3.87723	1.56907	2.7919
Utx	YES	0	1	0	0	0	0	0	1	0	0	-0.3188	0.4435	0.7324	-0.121967	-0.458333
Uts2r	YES	0	0	1	0	0	0	0	0	0	0	0.104267	0.023	0.002	0.00633333	0.0164667
Utp14b	YES	0	1	0	0	0	0	0	0	0	0	0.137767	-0.272567	-0.175967	0.742867	0.1419
Uspl1		0	0	1	0	0	0	0	1	1	0	-0.0802667	-0.2628	-0.549967	-0.5534	-0.640933
Usp8		0	1	0	0	0	0	1	0	0	0	-0.156367	0.0548333	0.662067	0.6012	0.2102
Usp7	YES	0	1	0	0	0	0	1	0	0	0	-0.408233	-0.3904	-0.411967	-0.2154	-0.500633
Usp6nl	YES	0	0	0	0	0	1	0	0	0	0	-0.4457	-0.4533	-0.624	-0.0234667	-0.893733
Usp53		0	0	0	0	0	0	0	0	1	0	-0.0229	0.599367	1.56837	3.1576	1.02687
Usp47		0	0	0	0	0	0	1	0	0	0	-0.499	0.372133	0.0491667	-0.2793	-0.616267
Usp44		0	0	0	0	0	1	0	0	0	0	-0.3026	-0.5334	-0.0301667	-0.731	-0.255467
Usp39		0	0	0	0	0	1	0	0	0	0	-0.2827	-0.5061	-0.602267	-0.436067	-0.710967
Usp25	YES	0	1	0	0	0	0	1	0	0	0	-0.8974	-0.599367	0.205467	0.527033	-0.559367
Usp2		0	0	0	0	0	0	0	0	1	0	0.0409667	-0.103667	-0.7877	-0.123367	-0.5707
Usp15		0	0	0	0	0	1	0	0	0	0	-0.8181	-0.310133	-0.0217333	-0.0774	-1.03107
Usp14		0	1	0	0	0	0	0	0	0	0	-0.826667	0.228567	0.108267	-0.743433	-1.02923
Usp1		0	0	0	0	0	0	1	0	0	0	-1.28267	-1.49133	-1.14127	-1.80363	-0.964333
Usmg4		0	0	0	0	0	0	0	1	1	0	0.3528	0.621733	0.1538	1.42613	0.873567
Uqcrc1	YES	0	0	1	0	0	0	0	0	0	0	0.124733	-0.850367	-1.0553	-0.014	0.0409
Upk3b		0	0	0	0	0	0	0	1	0	0	0.0595	-0.105533	0.4271	0.100167	0.255367
Upk1a		0	0	1	1	0	0	0	1	1	0	-0.2108	-0.4733	-0.534567	-0.105367	-0.5349
Upb1	YES	0	0	0	0	1	1	0	0	0	1	0.0449	0.0172	0.0773333	-0.0748	-0.0267
Uox	YES	0	0	0	0	0	0	0	0	1	0	-0.145567	0.0685333	-0.0994333	0.0139333	-0.105933
Unc93b1		0	0	0	0	0	1	0	1	0	0	-0.414467	-0.7044	-0.650667	-0.427133	-0.784033
Unc84b	YES	0	0	0	0	0	0	1	0	0	0	0.543433	-0.893967	-0.764567	0.145533	-0.116667
Unc84a		0	0	1	0	0	0	0	0	0	0	-0.0922333	0.0953667	-0.375667	-0.388333	-0.357733
Unc5d	YES	0	0	0	0	0	0	1	0	0	0	-1.2004	-0.874	-1.42663	-0.951267	-1.19477
Unc5c	YES	0	0	0	0	0	1	0	0	0	1	0.2632	1.25777	1.4458	1.00493	0.990433
Unc5b	YES	1	1	0	0	0	0	0	0	0	0	-0.343733	-1.01113	0.0828667	1.098	-1.10307
Unc5a	YES	1	0	0	0	0	0	0	0	1	0	0.282067	-0.1656	-1.43667	-0.3694	-0.961433
Unc45a		0	0	1	0	0	0	0	0	0	0	0.612267	-0.133833	-0.5654	0.483867	0.107267
Unc13a	YES	0	0	1	1	0	0	0	0	0	0	0.323533	-0.2382	-1.3189	0.144667	-1.11507
Ulk2		0	0	1	0	0	0	1	0	0	0	0.075	1.5104	1.41767	0.361833	0.274633
Ugt2b5		0	0	0	0	0	0	1	0	0	0	0.218267	0.3937	0.5963	0.220433	0.666567
Ugt2b38		0	0	0	0	0	1	0	0	0	0	0.2963	0.411167	0.851267	0.338667	0.608433
Ugt2b37	YES	0	0	0	0	0	1	0	0	0	0	0.197967	0.150333	0.203267	0.103867	0.235567
Ugt1a5		0	0	0	0	0	1	0	0	0	0	0.3722	0.590433	1.32083	1.97267	2.0817
Ugt1a10		0	0	0	0	0	1	0	0	0	1	0.4004	0.571033	1.37477	2.0914	2.1252
Ufd1l		0	0	0	0	0	1	0	0	0	0	0.400033	0.795667	1.1344	0.219	0.3071
Ucp1		0	0	0	1	0	0	0	0	1	0	0.112933	0.158567	0.183067	0.133533	0.270133
Uckl1		0	0	1	1	0	0	0	0	1	0	0.191	-0.0451667	-0.496267	0.644933	-0.480033
Uchl5	YES	0	0	0	1	0	0	0	0	0	0	-1.29727	-0.944867	-0.700533	-1.10343	-1.18787
Uchl3	YES	0	0	0	0	0	1	0	0	0	0	-0.7992	0.249767	-0.386367	-1.59193	-0.713433
Uchl1		0	0	0	0	0	1	0	0	0	0	0.0773	0.327367	-1.18293	0.7667	-0.476867
Ubtf	YES	0	0	0	0	0	0	1	0	0	0	0.211167	-0.736867	-0.6914	-0.021	0.144833
Ubtd1		0	1	0	0	0	0	0	0	0	0	0.479633	-0.481867	-0.494867	0.606933	-0.528433
Ubqln2		0	0	1	1	0	0	1	0	1	0	0.0317667	0.524267	0.348133	-0.911567	-0.2226
Uble1b	YES	0	0	0	1	0	0	0	0	1	0	-0.255667	-0.616633	-0.3128	-0.344167	-0.465633
Uble1a		0	0	1	0	0	0	0	0	0	0	-0.478267	-1.1537	-0.9748	-0.9798	-0.442567
Ubl7	YES	0	0	1	0	0	0	0	0	0	0	0.525233	0.059	-0.275733	0.521667	0.4763
Ubl5	YES	0	1	0	1	0	0	0	1	0	0	-0.00893333	0.389167	-0.375467	0.0231333	-0.126633
Ubl4b		0	0	1	1	0	0	0	0	0	0	0.223067	0.0215	0.537867	0.0626667	0.339833
Ubl3		0	0	0	0	0	0	0	0	1	0	-0.0394333	0.307067	0.804267	0.393133	0.0205667
Ube4b	YES	0	0	0	0	0	1	0	0	0	0	0.324033	0.244367	0.00886667	0.00476667	0.1495
Ube4a		0	0	1	0	0	0	0	0	0	0	0.197767	-0.3434	-0.261	0.495767	0.1612
Ube3a		0	0	1	0	0	0	1	0	0	0	-0.8589	0.221433	-0.412133	-0.736833	-0.414767
Ube2z		0	0	0	1	0	0	0	1	1	0	-0.0967333	-0.288933	-0.466367	0.357367	-0.448933
Ube2s	YES	0	0	0	0	0	0	0	1	0	0	-0.376133	-1.25813	-2.0549	-1.64687	-0.599133
Ube2r2		0	0	0	1	0	0	0	0	0	0	-0.2515	-0.114567	0.00513333	-0.0538667	-0.3454
Ube2q2		0	0	0	1	0	0	0	0	1	0	-0.612167	0.219667	0.0159333	-0.3069	-0.893233
Ube2j2	YES	0	0	1	0	0	0	0	0	0	0	-0.0387	-0.3112	-0.763433	0.0138667	-0.371733
Ube2j1		0	1	0	0	1	1	1	0	0	0	-0.475167	-0.1746	-0.304067	-0.0804667	-0.645533
Ube2d3		0	1	0	0	0	0	0	0	0	0	-0.300167	0.8843	0.818967	-0.5075	-0.326133
Ube1y1		0	0	1	1	0	1	0	0	1	0	0.0816667	0.1801	-0.251833	-0.3563	-0.0190667
Ubd		1	0	0	0	0	1	0	0	0	0	0.5225	0.2759	0.9814	0.370333	1.0695
Ubc	YES	0	0	0	0	0	0	0	0	1	0	0.313233	-0.181567	-0.577333	0.549733	0.224867
Ubap1	YES	0	0	0	0	0	0	1	0	0	0	0.1685	-0.0464	-0.3054	-0.0556333	0.0755667
Ubadc1		0	0	0	0	0	0	0	1	0	0	0.0459	-0.322433	-0.497933	-0.172733	-0.4567
Uba52		0	0	0	1	0	0	0	0	0	0	0.5516	0.354167	-0.405767	-0.314967	0.067
Uap1l1	YES	0	0	0	1	0	0	0	0	0	0	0.507833	-0.5074	0.0412667	0.5621	0.575333
U2af2		0	0	0	0	0	0	0	1	0	0	0.8395	-1.0643	-1.1681	0.944033	-0.0372
Tyr	YES	0	0	0	0	0	1	0	0	0	1	0.0474	-0.0334	-0.233933	-0.143033	0.071
Tyki	YES	0	0	0	1	0	0	0	0	0	0	-0.250167	-0.286	0.5215	1.5546	0.580167
Tyk2	YES	0	0	0	0	0	0	0	1	0	0	-0.135633	-0.4685	-0.910667	-0.0768333	-0.5664
Txnl4b		0	0	0	0	0	1	0	0	0	0	0.754167	0.173367	0.133833	1.05903	0.183533
Txnl4		0	1	1	1	0	0	1	0	0	0	0.267533	0.276467	0.3787	0.127267	0.803267
Txnl2	YES	0	0	0	0	0	0	0	1	0	0	-0.0122333	0.0615333	-0.1559	-0.4368	-0.101167
Txnip	YES	0	0	0	0	0	0	1	0	0	0	1.05413	0.846333	0.9785	1.56127	1.61817
Txndc5	YES	0	0	0	1	0	0	0	0	0	0	-0.0270333	-0.681533	0.0265	0.6994	0.7099
Txndc10		0	0	0	0	0	0	1	0	0	0	-0.881733	-0.00253333	0.779267	-0.431667	-1.31813
Txndc1		0	0	1	0	0	1	0	0	0	0	-0.886133	-0.0317667	0.143567	-1.40333	-1.49243
Twsg1		0	0	0	0	0	0	1	0	0	0	-0.3955	0.311033	0.983867	0.2886	0.257833
Twist2	YES	0	0	0	1	0	0	0	0	0	0	-0.0773667	-0.0702333	-0.0994333	-0.120533	0.0860667
Twist1		0	0	1	0	0	0	0	0	1	0	-0.0582667	-0.0806667	-0.199567	-0.140667	0.0008
Tusc4	YES	0	0	0	0	0	0	0	0	1	0	0.273367	0.0840333	-0.561667	0.226833	-0.0194667
Tusc1		0	0	0	1	0	0	0	0	0	0	-0.0252333	0.0372667	-0.5958	-0.367933	0.271133
Tubg1	YES	0	0	1	0	0	0	0	0	0	0	-0.117067	-1.6107	-1.63833	-0.605567	-0.3223
Tubd1		0	0	1	1	0	0	0	0	0	0	-0.352033	-1.01567	-1.16607	-0.167833	-0.6691
Tubb4	YES	0	0	0	0	0	0	0	1	0	0	0.935967	0.8831	0.834167	2.46563	0.6432
Tubb2a		0	0	1	0	0	0	0	1	0	0	-0.431933	-0.0026	-0.512	0.296167	-0.278267
Tuba2		0	0	1	0	0	0	0	0	0	0	-0.0900667	-0.565733	-0.479867	0.222067	0.225167
Ttyh3	YES	0	0	0	1	0	0	0	1	0	0	-0.2456	-0.808033	-1.2	-1.371	-0.537367
Ttyh2	YES	0	0	1	0	0	0	0	0	0	0	0.6558	0.2728	1.19087	1.00167	1.4207
Ttrap	YES	0	0	1	0	0	0	1	0	0	0	-1.22697	0.0662667	-0.3742	-1.69617	-0.950133
Ttn	YES	0	0	0	0	0	0	0	0	0	1	-0.169167	-0.143567	-0.270233	-0.1931	-0.1824
Ttll4	YES	0	0	0	0	0	0	1	0	0	0	-0.6776	-1.2347	-1.79393	-1.2597	-1.28077
Ttll1	YES	0	0	1	0	0	0	0	0	0	0	0.8464	0.0425333	-0.2711	0.9626	-0.124133
Ttc7	YES	0	0	0	0	0	0	0	1	0	0	-0.1254	-0.561867	-0.9274	-0.3833	-0.3518
Ttc3	YES	0	0	0	0	0	0	1	0	0	0	-0.4963	0.316767	-0.302033	-0.559333	-0.8466
Ttc22		0	0	0	0	0	0	0	1	0	0	0.0448667	-0.0774333	-0.0810333	0.0298667	-0.0284
Ttc14		0	0	0	0	0	0	1	0	0	0	-1.07333	1.0282	0.628967	-0.695667	0.102033
Tssk2	YES	0	0	0	1	0	0	0	1	1	0	0.1593	-0.0811667	-0.1326	0.0681333	0.1475
Tssc4		0	0	0	0	0	0	0	1	0	0	-0.0913333	-0.8127	0.186967	0.745367	0.315967
Tspyl3	YES	0	0	0	0	0	0	0	1	1	0	-0.312433	0.0272333	-1.35247	-0.763533	-1.35373
Tspyl1		0	0	0	0	0	0	1	0	0	0	0.760967	0.5917	0.4692	0.666233	0.326067
Tspan33		1	0	0	0	0	0	0	0	0	0	0.4868	-0.3078	-0.630567	0.172667	-0.273767
Tspan32	YES	0	0	0	0	0	0	0	1	1	0	0.0390333	0.0282	0.0444667	0.240333	0.136533
Tspan3		0	0	0	1	0	0	0	0	0	0	-0.1327	0.745767	1.44067	0.3214	0.578533
Tspan14	YES	0	0	0	0	0	1	0	0	0	0	0.5864	0.708133	0.627967	0.347167	1.1865
Tslp		0	1	0	0	0	0	0	0	0	0	0.0881667	0.243	0.1977	-0.0203667	0.2825
Tsga8		1	0	0	0	0	0	1	0	0	0	0.176833	-0.00293333	-0.169467	-0.0907333	-0.0069
Tsga2		1	0	0	0	0	0	0	0	0	0	-1.04973	-1.16753	0.136467	1.54437	-0.0899667
Tsga13	YES	0	0	0	0	0	1	0	0	0	1	0.00143333	-0.0400667	-0.0128667	-0.0967	0.0993667
Tsga10		0	0	1	1	0	1	0	0	0	1	-0.0712333	0.4429	-0.238433	0.205267	0.177733
Tsfm	YES	0	1	0	0	0	0	1	0	0	0	-0.4319	-1.0559	-1.29017	-0.701333	-0.898
Tsc22d1	YES	0	0	0	1	0	0	1	0	1	0	0.276533	0.235933	0.0930333	0.742967	0.529767
Tsc1		0	0	0	0	1	1	0	0	0	0	0.1046	0.188	-0.668267	-0.411933	-0.222067
Trpv6		0	1	0	0	0	0	0	0	0	0	0.0611333	-0.130133	-0.3868	0.0094	-0.126467
Trpv5		0	0	1	0	0	1	0	1	1	0	0.298667	0.143067	0.297667	0.0095	0.1757
Trpm8		0	0	0	0	0	1	0	0	0	0	-0.0125667	0.186367	0.0898333	0.240933	0.0821333
Trpm5		0	0	0	1	0	0	0	1	1	0	0.0243333	-0.289833	0.0737333	0.258867	-0.1318
Trpm4		0	0	1	0	0	0	0	0	1	0	-0.0791	-0.2418	0.0015	-0.145933	-0.3194
Trpm3	YES	0	1	0	1	0	0	0	0	0	0	-0.618233	0.240867	-0.327367	-0.530767	-0.1035
Trpc7	YES	0	1	1	1	0	1	0	1	0	0	-0.196167	-0.230967	-0.385867	-0.2283	-0.353833
Trpc4	YES	0	0	0	0	0	0	0	0	1	0	-0.510733	-0.134433	0.280767	0.5077	-0.397633
Trpc3		0	0	0	0	0	0	1	0	0	0	-0.784633	-0.540533	-1.0609	-0.9898	-0.4786
Trpc1	YES	0	0	0	0	1	1	0	0	0	0	-0.7723	-0.3659	-0.285233	0.212067	-0.9545
Trp73	YES	0	0	0	1	0	0	0	0	0	0	-0.2063	-0.352467	-0.900667	-0.1937	-0.3797
Trp63	YES	0	0	0	0	0	0	1	0	0	0	0.133367	0.290367	0.2106	0.111667	0.260667
Trp53inp1		0	0	0	1	0	0	0	0	1	0	-0.545933	1.11353	1.3966	-1.0714	-0.842767
Triobp	YES	0	0	0	1	0	0	0	1	1	0	0.684133	-1.1916	-1.92783	0.270233	-1.22907
Triobp	YES	0	0	1	1	0	0	0	0	0	0	-0.2704	-0.672467	-0.793367	0.357433	-0.212933
Trim9	YES	0	1	1	1	0	0	0	0	0	0	-0.616967	-0.1884	-0.6544	-0.5926	-0.350767
Trim65	YES	0	0	0	0	0	0	0	0	1	0	0.032	0.1108	-0.0983667	0.156867	-0.0597
Trim63		0	0	0	0	0	0	0	1	1	0	0.152067	-0.160033	-0.226567	0.0039	0.0189667
Trim59		0	1	0	1	0	0	0	0	0	0	-1.2525	-0.719	-0.197867	-1.78707	-1.6029
Trim52		0	0	0	0	0	0	1	0	0	0	0.1859	0.514767	0.615833	0.0572333	0.7542
Trim44	YES	0	0	0	0	0	0	1	0	0	0	-0.4372	0.454333	0.3709	-0.376067	-0.265233
Trim39	YES	0	0	0	0	0	0	0	1	1	0	-0.268033	0.0072	-0.252133	-0.0629667	-0.2502
Trim38		0	1	0	0	0	0	0	0	0	0	0.0444	0.1592	0.2609	0.2361	0.0778667
Trim37	YES	0	0	0	1	0	0	0	1	1	0	-1.02417	-0.304833	-1.1868	-0.729333	-1.557
Trim34	YES	0	0	0	0	0	0	1	0	0	0	0.236467	0.364833	0.584233	0.332333	0.5038
Trim32		0	0	1	0	0	0	0	1	0	0	0.426933	0.680867	0.0276667	-0.336233	-0.248233
Trim3	YES	1	0	0	0	0	0	0	1	0	0	0.057	-0.162033	-0.519833	0.119767	-0.137167
Trim23		0	1	1	0	0	0	1	0	0	0	-0.940333	0.785367	0.5689	-0.3056	-1.015
Trim13		0	1	0	0	0	0	0	0	0	0	-0.0307333	0.728033	0.928333	0.715333	0.311033
Trib1		0	0	0	1	0	0	0	0	0	0	-1.44733	-1.5329	-0.271467	-1.4775	-0.862067
Trhr2	YES	0	0	1	1	0	0	0	0	1	0	-0.0260667	-0.0987667	-0.1078	0.00226667	-0.0580667
Trhr		0	0	0	0	0	1	0	0	0	0	-0.781067	0.442167	0.0180667	-0.470333	-0.152
Treml1		0	0	1	0	0	0	0	0	0	0	0.102667	0.0868	0.0263	0.2413	0.231633
Trem2		0	0	1	0	0	0	0	0	0	0	0.504833	0.0364	0.0645667	0.527867	0.254033
Trappc6a		0	0	0	1	0	0	0	1	0	0	0.120533	0.426067	-0.201	0.1284	-0.197467
Trappc3		0	0	0	1	0	0	0	0	0	0	0.1882	0.0836333	0.0039	0.721267	0.110067
Trappc2		1	0	0	0	0	1	0	0	0	1	-0.540867	1.0484	1.13663	-0.206167	-0.563267
Trappc1		0	0	1	0	0	0	0	1	0	0	0.0252	-0.359267	-0.736733	-0.425867	-0.3405
Tram2		1	0	0	0	0	1	0	0	0	0	0.288267	-0.9424	-1.15613	0.731667	-0.528967
Trafd1	YES	0	0	0	1	0	0	0	0	1	0	0.7779	0.525467	-0.0870333	0.555533	0.694433
Tpx2		0	0	0	0	0	0	0	1	0	0	-0.852833	-1.9473	-2.29733	-2.70277	-1.08093
Tpt1	YES	0	1	0	0	0	0	0	0	0	0	-0.0684667	0.563367	-0.3702	-1.1764	-0.507333
Tpsg1	YES	0	0	1	1	0	0	0	0	1	0	0.0631667	-0.1297	-0.0528667	0.0105333	-0.0124333
Tpsab1		0	0	0	0	0	0	0	1	0	0	-0.0605667	-0.135167	0.145067	0.0626	-0.0304333
Tpk1		0	0	0	0	0	1	0	0	0	0	0.1213	0.654467	0.380667	0.293667	-0.2242
Tph2	YES	0	1	1	1	1	0	0	0	0	0	-0.0392667	0.1608	0.284167	0.423633	0.2235
Tpd52l1		0	0	0	1	0	0	0	0	1	0	-0.278367	-0.0484	-0.575267	-0.5605	-0.4618
Tpbpb	YES	1	0	0	0	0	0	0	0	0	0	0.296633	0.3977	0.641033	0.298567	0.449033
Tpbpa		0	0	0	0	0	1	0	0	0	0	0.672233	1.00947	1.4765	0.328667	1.19113
Tparl		0	1	0	0	0	0	0	0	0	0	-0.213833	-0.2537	0.0624	-0.217567	-0.110567
Tor1a	YES	0	0	0	1	0	0	0	0	1	0	0.1224	-0.202367	-0.581133	-0.3783	-0.1952
Top2b	YES	0	1	0	1	0	0	0	0	0	0	-0.8529	1.0118	0.7444	-1.11763	-0.687933
Top1mt		0	0	1	0	0	0	0	0	0	0	-0.421467	-0.427267	-0.8914	-0.1553	-1.32863
Top1		0	0	1	0	0	0	0	0	0	0	-0.912633	0.288367	-0.00183333	-1.21047	-0.7655
Tomm70a	YES	0	0	0	0	1	0	0	0	0	0	-0.918567	0.0585	0.0913667	-0.893867	-1.42917
Tomm7		0	0	1	0	0	0	0	0	0	0	0.103733	0.7546	0.505333	-0.828767	0.03
Tomm34	YES	0	0	1	0	0	0	0	1	1	0	0.2843	-0.1296	-0.447033	0.3557	0.182233
Tomm20		0	1	0	0	0	0	0	0	0	0	-0.178	0.0539667	-0.143633	-0.841367	-0.566433
Tob1	YES	0	1	0	0	0	0	0	0	0	0	0.077	0.1082	0.175067	0.984367	0.0684667
Tnrc9	YES	0	0	0	1	0	0	0	0	1	0	0.489833	1.48923	0.7729	-0.4827	0.1049
Tnrc4	YES	0	0	0	1	0	0	0	0	0	0	-0.306933	-0.448633	-1.1205	-0.2048	-0.439833
Tnr	YES	0	0	1	1	0	0	0	0	0	0	0.562533	1.3069	1.1171	1.82887	-0.0986
Tnpo3		0	0	1	0	0	0	0	0	0	0	-0.3097	-0.202367	-0.234567	-0.591667	-0.561067
Tnpo1	YES	0	1	0	1	0	0	1	1	0	0	-0.988933	-0.363733	-0.102	-0.6903	-1.14083
Tnnt3		0	0	0	0	0	0	0	1	0	0	0.201433	0.423267	0.774233	0.909933	0.2201
Tnnt1		0	0	0	0	0	0	0	0	1	0	-0.6382	-0.775833	-0.766	-0.766733	-0.3157
Tnnc1		0	0	1	0	0	0	0	0	0	0	0.276367	0.0146667	0.1851	0.2139	0.128367
Tnn		0	0	0	0	0	0	0	0	1	1	0.2054	0.1078	3.24937	2.42043	3.1831
Tnip2	YES	0	0	0	1	0	0	0	1	1	0	-0.240767	-0.206367	0.1339	0.506133	-0.0290667
Tnfsf9	YES	0	0	0	0	0	0	0	1	0	0	-0.298667	-0.7865	-0.9502	-0.469633	-0.607767
Tnfsf4	YES	0	0	0	0	0	1	0	0	0	0	0.219467	0.3077	0.569133	0.251533	0.324567
Tnfsf13b		0	0	0	0	0	1	0	0	0	0	-0.113567	-0.0003	-0.181467	-0.1859	0.0569333
Tnfrsf8		0	0	0	0	0	1	0	0	0	0	0.0638	0.0095	-0.1804	0.0354	0.0491
Tnfrsf7		0	0	1	0	0	0	0	1	0	0	0.0929333	-0.0611333	-0.0828	0.0183	0.1067
Tnfrsf4		0	0	1	0	0	0	0	0	0	0	-0.319033	-0.318767	-0.4347	-0.4293	-0.135433
Tnfrsf25		0	0	0	1	0	0	0	1	1	0	0.1694	0.0306	0.289067	0.3096	0.318567
Tnfrsf21		0	0	0	1	0	0	1	0	1	0	0.2063	0.678867	1.1024	-0.7166	1.19417
Tnfrsf1b		0	1	0	0	0	0	0	0	0	0	0.2604	-0.00266667	0.2664	-0.0483	0.152933
Tnfrsf19		0	0	1	0	0	0	0	0	1	0	0.282133	-0.172633	-1.00483	-1.15737	-0.926767
Tnfrsf13c	YES	0	0	0	1	0	0	0	0	1	0	-0.1704	-0.3429	0.0136333	0.182533	-0.252
Tnfaip8l3	YES	0	0	0	1	0	0	0	0	0	0	0.1893	0.665667	-0.0143	0.0510333	0.225733
Tnfaip8l1	YES	0	0	0	0	0	0	0	1	0	0	-0.282733	-0.662267	-0.935267	-0.725733	-0.6268
Tnfaip8	YES	0	1	0	0	0	0	0	0	0	0	-0.535667	0.4179	-0.2841	-0.9255	-0.8308
Tnfaip3	YES	1	0	0	0	0	0	0	0	0	0	-0.2154	-0.0618333	-0.374733	-0.0992667	-0.471333
Tnf	YES	0	0	1	1	0	0	0	1	1	0	-0.0028	-0.222467	0.164333	-0.0122667	0.109233
Tmtc4		0	0	0	1	0	0	0	0	0	0	-0.5806	0.676767	-0.00363333	0.2504	0.0262667
Tmtc3	YES	0	0	0	0	0	0	1	0	0	0	-1.06303	-0.8426	-0.627667	-0.660667	-1.1155
Tmtc2	YES	0	0	0	0	1	0	0	0	0	0	-0.687433	0.0281667	1.07617	-0.937933	-0.3144
Tmprss7		0	1	0	0	0	1	0	0	0	0	-0.2959	-0.0956333	-0.301833	-0.0460667	0.282467
Tmprss6	YES	0	0	0	1	0	0	0	0	1	0	0.0776	-0.126667	-0.307267	-0.0746333	-0.111133
Tmprss11f		0	0	0	0	0	0	1	0	0	0	0.0619333	-0.2177	-0.0540667	0.0206333	-0.0483333
Tmprss11e		0	0	0	0	0	1	0	0	0	0	0.159	0.0235	0.2479	0.118467	0.468267
Tmprss11c	YES	0	0	0	0	0	1	0	0	0	0	0.101433	0.275933	0.2581	0.0926667	0.218533
Tmprss11b		0	0	0	0	1	1	0	0	0	0	0.423167	0.324833	0.274033	0.157067	0.247333
Tmprss11a		0	0	0	0	0	0	1	0	0	0	0.143667	0.3934	0.5159	0.109367	0.267567
Tmpo		0	1	0	0	0	0	1	0	0	0	-0.7048	-1.2328	-1.56703	-1.34363	-0.868867
Tmod4		0	0	1	0	0	0	0	0	0	0	-0.299367	-0.108667	-0.561867	-0.154933	-0.344333
Tmhs	YES	0	1	0	1	0	0	0	0	0	0	-0.0465667	-0.187367	-0.181867	-0.0903667	-0.0168667
Tmem9b	YES	0	1	0	0	0	0	1	0	0	0	0.531867	0.910067	1.38723	1.11383	0.5605
Tmem98	YES	1	0	0	0	0	0	0	0	0	0	-0.299633	-1.0685	0.577733	1.5446	1.08447
Tmem90a		0	0	0	1	0	0	0	0	0	0	-0.174933	-0.4801	-0.868867	-0.6257	-0.9631
Tmem87a	YES	0	0	1	0	0	0	0	0	0	0	-0.2797	0.2603	0.9375	0.3012	-0.0411333
Tmem77		0	0	1	0	0	0	0	1	0	0	-0.5777	1.05237	1.73983	0.1178	-0.1407
Tmem74		0	0	0	0	0	1	0	0	0	0	-0.704867	-0.242167	-0.823967	-0.126267	-0.370967
Tmem71		0	1	0	0	1	1	0	0	0	0	0.123567	0.230167	0.0179333	0.0119333	0.253867
Tmem70		0	0	1	0	1	1	0	0	0	0	-1.0656	-0.3599	-0.634067	-1.06703	-1.21913
Tmem69		0	0	1	0	0	0	0	0	0	0	0.0194333	-0.113767	-0.3181	-0.135067	-0.0894333
Tmem65		0	1	0	0	0	0	0	0	0	0	-0.6366	0.4338	0.7877	0.5843	-0.2004
Tmem62		0	1	0	0	0	0	0	0	0	0	0.552767	0.840067	1.59983	1.1161	0.979567
Tmem57	YES	0	0	0	0	0	0	0	0	1	0	0.418633	0.7824	0.227267	0.0903333	0.352533
Tmem56	YES	0	0	0	0	0	1	1	0	0	0	-1.2697	-0.1556	-0.187467	-0.5787	-0.7778
Tmem55b	YES	0	0	0	0	0	0	1	0	0	0	-0.287933	-0.237933	-0.864333	-0.700067	-0.524633
Tmem55a		0	0	0	0	0	0	1	0	0	0	-0.570533	0.548467	0.746767	0.0081	-0.350433
Tmem50a		0	0	0	0	0	0	0	0	1	0	0.4978	0.451667	0.389533	0.6281	0.5948
Tmem46	YES	0	1	0	0	0	0	0	0	0	0	-0.151867	-0.244767	-1.2415	-0.911067	-0.6309
Tmem45b	YES	0	0	0	0	0	0	0	1	0	0	0.120633	0.0748	0.0292667	-0.221133	0.0611
Tmem43	YES	0	0	1	0	0	0	0	0	0	0	0.0864667	-0.215367	0.234867	0.892867	0.0741
Tmem42	YES	0	0	1	0	0	0	0	1	1	0	0.1484	0.1434	0.118767	-0.0622	0.0540667
Tmem4	YES	0	0	0	0	0	0	0	0	1	0	0.0537333	-0.0548333	-0.416067	-0.2178	-0.2163
Tmem38b	YES	0	1	0	0	0	1	0	0	0	0	0.125333	0.214867	0.790133	0.722567	-0.2415
Tmem38a		0	0	1	0	0	0	0	0	0	0	0.4436	0.0012	-0.5962	0.0908667	-0.309433
Tmem30a		0	1	0	0	0	0	0	0	0	0	-1.1199	0.737233	1.18637	-0.6094	-1.00027
Tmem28	YES	0	0	0	0	0	0	0	1	1	0	-0.110867	0.8324	-0.0668333	0.300833	-0.979333
Tmem25		0	0	0	1	0	0	0	0	1	0	-0.0768	0.0585	-0.402133	0.4201	-0.534133
Tmem17		0	0	0	0	0	0	0	0	1	0	0.0179	-0.0443	-0.240833	0.111167	0.0031
Tmem16k	YES	0	0	0	0	0	0	0	1	0	0	0.780633	0.0728333	0.468233	1.3651	0.3642
Tmem16g		0	0	0	1	0	0	0	0	1	0	0.305467	-0.0178667	0.4264	0.208233	0.152033
Tmem14a	YES	1	0	0	0	0	0	0	0	0	0	-0.244467	0.0609	-0.128133	0.0129667	-0.203167
Tmem122		0	0	0	0	0	1	0	0	0	0	0.280533	0.632733	0.618267	0.1847	0.4304
Tmem118	YES	0	0	1	0	0	0	0	0	0	0	0.3008	0.279767	-0.2347	0.364533	-0.3361
Tmem110		0	1	0	0	0	0	1	0	0	0	0.0672333	-0.233033	-0.827167	0.135967	-0.336133
Tmem109		0	0	1	0	0	0	0	1	0	0	-0.171067	-0.9801	-1.3	-0.649767	-0.276267
Tmem106c	YES	0	0	0	0	0	0	0	1	0	0	0.6093	0.284	0.2448	0.963333	0.888967
Tmem10	YES	0	0	0	0	0	0	0	0	1	0	0.1343	0.0205667	1.8656	3.42063	0.1675
Tmeff2	YES	0	0	0	1	0	1	0	1	1	0	0.0421333	1.7786	2.94457	2.36183	0.535333
Tmed6		0	0	0	0	0	1	0	0	0	0	0.00676667	0.0787667	0.0852	-0.0507333	-0.0267
Tmed4		0	0	1	0	0	0	0	1	0	0	0.0965333	-0.379133	-0.322767	0.180933	-0.0444667
Tmed3	YES	0	0	1	0	0	0	1	0	0	0	0.2407	-0.2776	-0.369667	0.269367	-0.0741
Tmco3		0	0	1	0	0	0	0	1	0	0	0.0824	0.152133	0.352667	-0.1116	0.0499333
Tmcc2	YES	0	1	0	0	0	0	0	0	0	0	0.546333	0.172833	-0.167567	0.942967	-0.1948
Tmc2		0	0	0	0	0	1	0	0	0	0	0.0518	0.0734667	0.311833	0.00336667	0.2714
Tm9sf2	YES	0	0	1	0	0	0	0	0	0	0	-0.386867	0.267033	0.3147	-0.429567	-0.4459
Tm7sf4		0	0	0	0	0	0	1	0	0	0	0.349733	0.4321	0.854533	0.3092	0.7466
Tm7sf3		0	1	0	0	0	0	0	0	0	0	-0.1375	-0.0235	0.7686	0.8664	0.188333
Tm6sf1		0	0	0	1	0	0	0	0	0	0	-0.954033	-1.4034	-1.03933	-0.5066	-1.369
Tm4sf1	YES	0	0	0	0	0	0	0	1	0	0	-0.0429	-0.0583333	0.0589	0.614967	0.150167
Tm2d1		0	1	0	0	0	0	1	0	0	0	-0.256567	0.9078	0.706833	-0.3056	-0.381033
Tlx2	YES	0	0	0	0	0	0	0	1	0	0	-0.0413333	-0.105267	-0.546233	-0.0295333	-0.0827
Tlr3		0	0	1	0	0	0	0	0	0	0	0.0178667	0.0469667	0.1	-0.0116	0.0369333
Tlr11		0	0	0	0	0	1	0	0	0	0	0.125733	0.124167	0.160333	0.1014	0.3508
Tlk2	YES	0	0	0	0	0	0	0	1	1	0	-0.318667	0.650467	0.274567	-0.4619	-0.519767
Tlk1		0	0	0	0	0	1	0	0	0	0	-0.782233	0.113967	-0.0361333	-0.8324	-0.8522
Tle3	YES	0	0	0	1	0	0	0	0	0	0	0.4337	-1.06327	-0.538267	1.47083	0.575967
Tle1		0	0	0	0	0	0	1	0	0	0	-0.0589667	0.841233	0.346867	-0.456333	0.164867
Tktl2	YES	0	0	0	0	0	0	1	0	0	0	0.381833	0.369267	0.495367	0.365067	0.293367
Tk2		0	1	0	0	0	0	1	0	0	0	0.480567	0.171233	-0.576567	0.390133	0.0358667
Tjp3	YES	0	0	0	1	0	0	1	1	0	0	-0.0640333	-0.444067	-0.843733	-0.470567	-0.642767
Tjp1	YES	0	0	0	0	0	0	1	1	1	0	-0.501633	-0.465233	0.5713	-0.6057	-0.483233
Tjap1		0	0	0	0	0	0	0	0	1	0	-0.0387667	-0.6842	-0.980833	0.2914	0.467167
Tipin		0	0	0	0	0	0	1	0	0	0	-1.259	-1.23583	-1.3078	-2.0864	-1.0398
Tiparp		0	1	1	1	0	0	1	0	1	0	-0.3201	0.178233	-0.0414333	-0.3014	-0.3527
Tinagl		0	0	1	0	0	0	0	0	1	0	-0.134733	-0.289333	-0.194733	-0.107433	-0.4482
Timp3		0	0	0	1	0	0	0	0	0	0	1.1176	2.04763	3.0338	1.57777	0.645467
Timm8b		0	0	1	0	0	0	0	0	0	0	0.0193667	0.303733	-0.243033	-0.6457	-0.325167
Timm8a	YES	0	0	0	0	0	0	0	1	0	0	-1.3834	-0.533433	-0.438233	-1.437	-0.964767
Timm22		0	0	0	0	0	1	0	0	0	0	0.3655	-0.1436	-0.3478	0.2246	-0.0572333
Timm13	YES	0	0	1	0	0	0	0	0	0	0	-0.0927667	-0.219167	-0.537667	-0.4658	-0.308067
Timm10	YES	0	1	0	0	0	0	0	0	0	0	-0.3593	-0.394367	-0.5668	-0.702733	-0.688933
Timd2		0	0	0	0	0	0	1	0	0	0	0.383533	0.3301	0.513	0.0547667	0.4396
Thy1	YES	0	0	0	0	0	0	0	0	1	0	0.315167	-0.251167	-0.2728	0.0532333	-1.127
Thsd4		0	0	1	0	0	0	0	0	0	0	-0.236267	0.202133	2.28517	1.58307	0.494933
Thrap6		0	0	0	1	0	0	1	0	1	0	-0.6081	-0.00126667	-0.529433	-1.34867	-0.669133
Thrap5	YES	0	1	0	0	0	0	0	1	0	0	0.583233	-0.451167	-1.16033	0.261667	0.100667
Thrap3		0	0	0	0	0	0	0	0	1	0	0.1999	-0.817333	-0.572267	0.0900333	-0.0593333
Thrap2	YES	0	0	0	0	0	0	0	1	0	0	0.213733	-0.337967	-0.831633	0.726533	0.117667
Thop1	YES	0	0	1	0	0	0	0	0	0	0	-0.0461333	-0.306167	-0.326167	0.0346333	-0.380867
Thoc1		1	0	0	0	1	0	0	0	0	0	-0.934133	0.0833333	0.169167	-0.6531	-1.2704
Thex1		0	0	0	0	0	0	1	0	0	0	-0.5651	-0.318733	-0.390533	-1.2113	-0.299567
Thedc1		0	1	0	0	0	0	0	0	0	0	-0.0698667	-0.0475333	0.0105333	-0.1676	0.170233
Tgoln2		0	1	0	0	0	0	0	0	0	0	-0.197533	-0.2079	0.5801	1.53207	-0.0349
Tgm5	YES	0	0	0	0	0	0	0	1	0	0	0.192133	0.0263	0.756067	0.465467	0.396433
Tgifx1		0	0	0	0	0	0	1	0	0	0	0.304	0.342267	0.4463	0.2523	0.474467
Tgif	YES	0	0	0	1	0	0	0	1	1	0	-0.5269	-0.9657	0.378967	1.26293	0.7204
Tgfa	YES	0	0	0	0	0	0	1	0	0	0	0.537833	0.553667	-0.486167	0.0047	-0.6763
Tfg		0	0	1	0	0	0	0	0	0	0	-0.3383	-0.128867	-0.0804667	-0.2447	-0.658467
Tff1		0	0	0	0	0	0	0	1	0	0	0.3574	0.216833	0.340733	0.3815	0.254167
Tfdp2	YES	0	0	0	0	0	0	1	0	0	0	-0.4644	-0.8303	-0.320967	0.0549667	-0.107733
Tfb1m		0	0	0	1	0	0	0	0	0	0	-0.0401667	-0.176533	-0.499367	-0.407467	-0.3175
Tfam		0	0	1	0	0	0	0	0	0	0	-0.278	-0.186367	0.0287	-0.4277	-0.560633
Tex9		0	0	0	0	1	0	0	0	0	0	-0.257467	-0.191833	0.240867	-0.4663	-0.0794333
Tessp3		0	0	0	0	0	1	0	0	0	0	-0.0225667	-0.0490667	0.0453	0.108033	0.1037
Tert		0	0	0	0	0	1	0	0	0	0	-0.2523	-0.548533	-0.701067	-0.127867	-0.611033
Terf2ip		0	1	0	0	0	0	0	1	0	0	-0.198567	0.401633	0.200633	0.164733	-0.358733
Terf1		0	0	0	0	0	0	0	0	1	0	-1.07873	-0.724967	-1.1234	-1.28113	-1.03327
Tera		0	0	0	0	0	0	0	0	1	0	-0.538867	-0.0540667	-0.447567	-1.4788	-0.494067
Tegt		0	0	1	0	0	0	0	0	0	0	0.5679	0.426067	0.657133	1.21803	0.958767
Tead1	YES	0	0	0	0	0	0	1	0	0	0	-0.4158	-0.983533	-0.569667	0.3772	-0.0465
Tdrd7		0	1	0	0	0	0	1	0	0	0	0.330167	0.0742333	0.0687667	0.518233	0.276433
Tdrd6		0	1	0	0	0	0	0	0	0	0	0.0199667	0.1873	-0.0722	0.0585	-0.0144
Tdrd3	YES	0	1	0	1	0	0	1	0	0	0	-0.5719	0.414233	-0.1658	-0.5034	-0.595267
Tdrd1	YES	0	0	0	0	0	1	0	0	0	1	0.0397	0.0652	0.0206667	0.0334	0.167167
Tdpoz5		0	0	0	0	0	1	0	0	0	0	0.559367	0.848033	1.41567	0.3568	1.2592
Tdpoz4		0	0	0	0	0	1	0	0	0	1	0.8964	0.932267	1.54477	0.697567	1.35933
Tdpoz3		0	0	0	0	0	1	0	0	0	0	0.6175	0.7129	1.10287	0.518033	1.15087
Tdpoz2		0	0	0	0	0	1	0	0	0	0	0.321033	0.209533	0.3816	0.147533	0.277033
Tdpoz1		0	0	0	0	1	1	0	0	0	0	0.295767	0.376867	0.844	0.1265	0.455233
Tdp1	YES	0	0	1	0	0	0	0	1	0	0	-0.4422	-0.442367	-0.6659	-0.5755	-0.443267
Tctex1d1		0	0	0	0	0	0	0	1	0	0	0.170433	0.1824	0.421867	0.1701	0.2815
Tcte2		0	0	0	0	0	0	1	0	0	0	-0.0304667	0.067	-0.1247	0.00726667	0.0145333
Tcp11l1		0	0	1	0	0	0	0	0	0	0	0.118067	0.0894667	0.0959	0.815567	-0.210333
Tcp10b		0	0	0	0	0	1	0	0	0	0	0.614467	0.4198	1.38827	0.387033	1.0583
Tcirg1	YES	0	0	0	0	0	0	0	1	0	0	-0.156667	-0.8288	-1.343	-0.0233	-0.490167
Tcfe2a	YES	0	0	0	1	0	0	0	1	1	0	-0.0069	-0.877067	-1.66403	-1.10247	-0.326667
Tcfap2d		0	1	0	0	0	1	0	1	0	0	-0.236267	-0.0786	-0.769433	-0.370067	-0.370733
Tcf7		0	0	0	1	0	0	0	1	1	0	-0.883167	-1.5741	-1.89243	-1.08883	-1.3369
Tcf4	YES	0	0	0	0	0	1	0	0	0	0	-0.486667	0.7864	0.235567	-0.795233	-0.2714
Tcf21	YES	0	0	1	0	0	1	0	0	0	0	0.2209	-0.0228667	0.0622667	0.0123	-0.0677333
Tcf2		0	0	0	0	0	0	0	1	0	0	0.3699	0.1826	0.467267	0.260933	0.388767
Tcf12	YES	0	1	0	0	0	0	0	0	0	0	-0.0253333	-0.256967	0.0853667	-0.152433	-0.6106
Tceal3		0	0	0	0	0	1	0	0	0	0	0.155133	0.418467	-0.4917	1.11147	-0.141867
Tbxa2r	YES	0	0	0	1	0	0	0	0	0	0	-0.1845	-0.111267	-0.316967	0.0982333	-0.213967
Tbx18	YES	0	0	0	1	0	0	1	1	1	0	-0.051	0.152967	-0.0480667	-0.328033	-0.0803
Tbx15	YES	0	1	0	0	0	0	0	0	0	0	0.0697	0.408433	0.186333	-0.0183667	0.176367
Tbx10		0	0	0	1	0	0	0	1	1	0	0.288233	-0.0927333	0.5136	0.234833	0.0998667
Tbl1xr1	YES	0	0	0	0	0	0	1	0	0	0	-0.4329	-0.5293	-0.246867	-0.486633	-0.9194
Tbk1		0	0	0	0	0	1	0	0	0	0	-0.5651	-0.0224333	-0.1096	-0.572633	-0.9346
Tbca	YES	0	0	0	0	1	0	0	0	0	0	-0.529167	0.8014	0.4755	-1.35597	-0.817533
Tbc1d7	YES	0	0	0	1	0	0	0	0	0	0	0.268433	-0.0475	-0.2593	-0.0750333	-0.2633
Tbc1d24		0	0	1	0	0	0	0	0	0	0	-0.279233	-0.466567	-0.8483	-0.2472	-0.730633
Tbc1d2	YES	0	0	0	0	0	0	0	0	1	0	0.303833	-0.0776667	-0.113967	0.0727333	-0.2273
Tbc1d1	YES	0	0	0	0	0	0	0	1	0	0	-1.15503	-2.44437	-2.02763	-1.72733	-1.79627
Tax1bp1	YES	1	1	0	0	0	0	0	0	0	0	-0.544833	0.669267	0.967167	0.320133	0.0534
Tatdn2	YES	0	0	0	0	0	0	1	1	1	0	-0.2031	-0.704133	-0.362067	-0.3024	-0.111767
Tat	YES	0	0	0	0	1	1	0	0	0	0	0.247667	0.181533	0.142767	0.0954	0.108233
Tas2r144		0	0	0	0	1	0	0	0	0	0	0.2874	0.483	0.651667	0.180167	0.456633
Tas2r143		1	0	0	0	0	1	0	0	0	0	0.4265	0.4339	0.303033	0.1945	0.357933
Tas2r139		0	0	0	0	0	1	1	0	0	0	0.3408	0.348967	0.468967	0.265333	0.453433
Tas2r137		0	0	0	0	0	0	0	0	0	1	0.115	0.353833	0.101367	0.0173	0.228967
Tas2r134	YES	0	1	0	0	0	1	0	0	0	0	0.358133	0.3138	0.685933	0.3409	0.757733
Tas2r131		0	1	0	0	0	1	0	0	0	0	0.198733	0.6134	0.937433	0.279667	0.899467
Tas2r130		0	1	0	0	0	0	0	0	0	0	0.116533	0.351133	0.494133	0.133	0.451333
Tas2r129		0	0	0	0	0	1	0	0	0	0	0.196333	0.0338667	0.192667	0.0851667	0.141567
Tas2r124		0	1	0	0	1	1	0	0	0	0	0.1166	0.2743	0.4034	0.1938	0.608067
Tas2r120		0	0	0	0	1	0	0	0	0	0	0.241733	0.434267	0.339567	0.129633	0.332233
Tas2r117		0	0	0	0	1	0	0	0	0	0	0.0979	0.250433	0.4161	0.208767	0.462433
Tas2r116		0	0	0	0	0	1	0	0	0	0	0.328233	0.7227	0.634933	0.2999	0.917033
Tas2r115		0	0	0	0	1	1	0	0	0	0	0.1655	0.279633	0.228267	-0.0699333	0.2619
Tas2r107		0	0	0	0	0	1	0	0	0	0	0.3383	0.6684	0.8739	0.3688	0.775
Tas2r104		0	1	0	0	0	0	0	0	0	0	0.1636	0.3694	0.312767	0.0244	0.2335
Tas2r102		0	1	0	0	0	0	0	0	0	0	0.189933	0.3785	0.447	0.0229667	0.714867
Tas1r2		0	0	0	1	0	0	0	1	0	0	0.178267	-0.0364	0.311133	-0.0378667	0.288467
Tarsl2	YES	0	0	1	0	0	0	0	0	0	0	-0.602067	-0.3823	-0.366667	-0.0542	-1.06933
Tarsl1	YES	0	0	0	0	0	1	0	0	0	0	-0.00526667	-0.725967	-1.26677	-0.4351	-0.4359
Tapbpl		0	0	0	0	0	0	0	1	0	0	-0.0606333	-0.502833	0.0354	1.1131	0.2228
Tap2		0	0	0	0	0	0	0	0	1	0	0.323167	-0.6195	1.22017	1.6703	0.9247
Tap1		0	0	1	0	0	0	0	0	0	0	-0.0648667	-0.8434	-0.1433	0.989233	-0.522967
Tank	YES	0	0	0	0	0	0	1	0	0	0	-0.537533	0.6516	0.6184	-0.4123	-0.3489
Tal2	YES	0	0	0	0	0	1	0	0	0	0	-0.168233	0.0857	0.0839333	-0.320633	0.1003
Tagln3		0	0	0	0	0	0	1	0	0	0	0.00526667	-0.0867	-1.0857	0.7916	1.48947
Tagln2		0	0	0	1	0	0	0	0	0	0	-2.04067	-3.32973	-3.523	-2.29543	-2.7201
Taf9		0	1	1	0	0	0	0	1	0	0	-0.480267	0.0414333	-0.140333	-0.839067	-0.481933
Taf7l	YES	1	0	0	0	0	1	0	0	0	0	0.111533	0.195733	0.0523	-0.215567	0.0576667
Taf7	YES	0	0	0	0	0	0	1	0	0	0	-0.683033	0.0940667	-0.105467	-0.7084	-0.471233
Taf3	YES	0	0	1	1	0	0	0	0	1	0	0.107	-0.498067	-0.4898	-0.156167	-0.1451
Tada2l		0	1	0	0	0	0	1	0	0	0	-0.163967	-0.0725333	-0.281367	-0.322067	-0.3873
Taar8b		0	0	0	0	0	1	0	0	0	0	0.309233	0.685167	0.8698	0.688833	0.9738
Taar8a		0	0	0	0	0	1	0	0	0	0	0.4843	0.708333	1.268	0.574833	1.64187
Taar7f		0	0	0	0	0	0	1	0	0	0	0.829967	0.679633	1.4603	0.7021	1.6438
Taar7e		0	0	0	0	0	1	1	0	0	0	0.7785	0.893533	1.58813	0.8418	1.96307
Taar7b		0	0	0	0	0	1	0	0	0	0	0.315367	0.4371	0.564933	0.354733	0.730367
Taar7a		0	0	0	0	0	1	0	0	0	0	0.533967	0.3489	0.298867	0.147267	0.3077
Taar5		0	0	0	0	0	0	0	0	1	0	0.140333	0.237433	0.353	0.156467	0.549833
Taar4		1	0	0	0	1	1	0	0	0	0	0.0868	0.225933	0.0965333	0.0146333	0.422833
Taar3		0	0	0	0	0	0	0	0	0	1	0.386733	0.469467	1.05617	0.442267	0.7674
Taar1		0	1	0	0	0	0	0	0	0	1	0.4206	0.548233	0.8541	0.4052	0.834567
Sytl3	YES	0	0	0	0	0	0	0	1	1	0	-0.0254333	-0.0640333	0.0436667	-0.00636667	0.290733
Sytl3	YES	0	0	0	0	0	1	0	0	0	0	0.113633	0.0211	0.149267	-0.119433	0.1767
Syt9	YES	0	0	0	0	0	1	0	0	0	0	-0.2757	-0.588667	-1.05047	-0.770233	-0.711267
Syt8		0	0	0	0	0	0	0	0	1	0	0.0638333	-0.168567	0.192233	-0.0426	0.0475333
Syt7	YES	0	0	0	0	0	0	1	0	0	0	0.2337	-1.4426	-2.05557	0.0984333	-1.7427
Syt6	YES	0	0	1	1	0	0	0	0	0	0	-1.10663	-0.803667	-1.76797	-1.1589	-1.43157
Syt4	YES	1	1	1	1	0	0	0	0	0	0	-0.7943	1.04667	-1.0197	-0.374	-2.26877
Syt3	YES	0	0	0	0	0	0	0	0	1	0	-0.168733	-0.2464	-1.2272	-0.136867	-0.7819
Syt16	YES	1	0	0	0	0	0	0	0	0	0	-0.324767	0.198167	-1.50833	-0.627733	-2.04593
Syt14	YES	0	1	0	1	0	0	0	0	0	0	-0.1567	0.0592	-0.137	0.318533	-0.4387
Sypl		0	0	1	0	0	0	0	0	0	0	-0.741367	0.0553667	0.671333	-0.0035	-0.587933
Syp	YES	0	0	0	1	0	0	0	0	0	0	0.428267	0.0732667	-1.497	0.3445	-1.18943
Synj2		0	0	0	1	0	0	0	1	0	0	-0.591867	-0.395833	-1.0005	-0.365533	-0.947367
Syngr2	YES	0	0	0	0	0	0	0	1	1	0	-0.384633	-1.2404	-0.0483	0.426333	-0.0133
Syncrip		0	1	0	1	0	0	0	1	1	0	-0.722233	-0.0408	-0.220067	-1.18223	-1.0785
Sync		0	0	0	1	0	0	0	1	1	0	-0.291	-0.3903	-0.3039	0.417733	-0.312467
Syn1	YES	0	0	1	0	0	0	0	1	0	0	0.76	0.766267	-0.7226	0.275467	-0.362733
Syk		0	0	0	0	0	1	0	0	0	0	-0.3196	-1.43573	-0.658733	-1.02113	-0.949333
Sycp3		0	0	0	0	0	1	0	0	0	0	-0.2653	0.223967	-0.0448	-0.1816	-0.244733
Syap1		0	0	0	0	0	0	0	1	0	0	-0.6585	0.470733	1.21977	0.998667	0.206833
Svs6	YES	0	0	0	0	1	0	0	0	0	0	0.391967	0.105467	0.381967	0.256167	0.375533
Svs3	YES	1	0	0	0	0	0	0	0	0	0	0.053	0.1072	0.199067	-0.178933	0.1058
Svp2	YES	0	0	0	0	0	1	0	0	0	0	0.1317	0.2047	0.1327	0.0109	0.1554
Svop	YES	0	0	0	1	0	0	0	0	0	0	0.298233	0.419667	-0.373	-0.257733	-0.330733
Svil	YES	0	0	0	0	1	0	0	0	0	0	-0.352667	-0.733333	-0.976433	-0.620367	-0.661333
Svep1		0	0	0	1	0	0	0	0	1	0	-0.3182	-0.542233	0.2414	-0.189167	0.567867
Sval2	YES	1	0	0	0	0	1	0	0	0	0	0.213233	0.354133	0.280067	0.0519333	0.3724
Sv2a	YES	0	1	0	0	0	0	0	0	0	0	0.0914667	-0.123833	0.272033	1.26467	-0.4723
Suv420h2		0	0	0	0	0	0	0	1	0	0	0.2098	-0.5668	-1.4802	-0.535	-0.676833
Suv39h2		0	0	1	1	0	0	0	1	0	0	-0.827567	-0.567233	-0.7704	-1.26987	-0.6019
Susd3		0	0	0	0	0	0	0	1	0	0	-0.0505333	-0.142633	-0.102433	0.169867	0.0536667
Supt16h		0	1	0	0	0	0	0	0	0	0	-0.961333	-0.5477	-0.778433	-1.1445	-0.72
Suox	YES	0	0	1	0	0	0	0	0	0	0	0.880133	0.0626	0.7136	1.9387	1.08807
Sumo3	YES	0	0	0	1	0	0	0	1	1	0	-0.1748	-0.928	-1.3159	-0.411767	-0.7201
Sumo2	YES	0	0	0	1	0	0	0	0	1	0	-0.7683	0.0365667	0.1176	-0.820667	-0.391767
Sumo1	YES	0	0	0	0	0	0	1	0	0	0	-0.914333	0.451967	0.101367	-1.24197	-0.6656
Sumf2	YES	0	1	1	0	0	0	0	1	1	0	0.349667	-0.171233	0.275933	0.812567	0.0692
Sult2b1	YES	1	0	0	0	0	1	0	0	0	0	-0.0053	-0.3118	-0.4039	-0.163767	-0.205633
Sult1e1		0	1	0	0	0	1	0	0	0	0	0.1782	0.146533	0.570533	0.1124	0.541767
Sulf1	YES	0	0	0	0	0	0	0	0	1	0	-0.464833	-0.736333	0.7305	1.175	-0.388767
Sucnr1		0	0	0	0	0	0	1	0	0	0	0.211233	0.258733	0.595533	1.32157	0.698567
Sucla2	YES	0	0	0	0	0	1	0	0	0	0	-1.29597	-0.0169	0.586167	-0.542433	-1.17203
Styx	YES	0	0	0	1	0	0	0	1	1	0	-1.51533	0.715533	0.446533	-1.44593	-1.56833
Styk1		0	0	0	0	0	0	1	0	0	0	-0.4098	-0.2011	-0.4324	-0.2894	-0.1348
Stxbp6	YES	0	0	0	1	0	0	0	0	1	0	-1.0349	0.0211333	0.8234	0.4284	-0.798333
Stxbp5l	YES	0	0	0	1	0	0	0	0	0	0	-0.309233	0.0819	-0.277	-0.1907	-0.0387667
Stxbp2		0	0	0	0	1	1	0	0	0	0	-0.127167	-0.1636	-0.438333	1.22743	0.359933
Stx8		0	0	0	0	0	1	0	0	0	1	0.0577667	-0.268633	-0.0449667	-0.0109333	-0.0423
Stx5a	YES	0	0	1	0	0	0	0	0	0	0	0.587567	0.310167	-0.2659	0.2959	0.3624
Stx4a		0	0	1	0	0	0	0	0	0	0	-0.851967	-1.01267	-0.4158	0.1923	-1.06153
Stx1a	YES	0	0	0	1	0	0	0	0	0	0	0.0449333	-0.223733	-2.1604	-0.107533	-1.42993
Stx18	YES	0	0	0	0	0	0	1	0	0	0	0.2625	-0.0536333	-0.0593667	0.5062	0.0975667
Stx16		0	1	0	0	0	0	0	0	0	0	-0.208667	0.1185	0.0456	0.198867	-0.162833
Stx12		0	0	1	1	0	0	0	0	1	0	-0.2956	0.3895	0.530833	-0.2533	-0.5893
Stub1	YES	0	0	0	1	0	0	0	0	1	0	0.0206667	-0.792233	-1.02987	-0.222867	-0.147833
Strn		0	0	0	1	0	0	0	1	1	0	-0.620633	-0.2549	0.637967	1.13927	-0.631767
Stno	YES	0	0	0	0	0	0	0	1	0	0	-0.0717333	-0.842167	1.09537	2.3256	1.1106
Stmn3	YES	0	0	1	1	0	0	0	0	0	0	0.7206	1.03697	-0.620667	-0.171933	-0.0813333
Stmn2	YES	0	1	0	1	0	0	0	0	1	0	-0.821967	0.965767	-3.07173	-0.6206	-3.36557
Stk40		0	0	1	0	0	0	0	1	1	0	0.0793333	-1.01853	-1.17577	0.321167	-0.571733
Stk39	YES	0	0	0	0	1	0	0	0	0	0	-0.479867	-0.5365	0.295367	-0.0371333	-1.79967
Stk38l	YES	0	1	0	0	0	0	1	0	0	0	-0.0865	0.944367	0.903833	0.232667	0.1052
Stk36	YES	0	0	1	0	0	0	0	0	0	0	0.503433	0.3169	0.0149333	0.5438	0.5471
Stk32a	YES	1	0	0	0	0	0	0	0	0	0	0.702167	0.980033	0.197333	0.7197	0.0792
Stk31	YES	0	1	0	0	0	0	0	0	0	0	-0.0291333	0.239	0.251	0.0341333	0.310767
Stk25		0	0	1	0	0	0	0	1	1	0	0.0119	-0.123567	-0.2726	0.1039	-0.0698667
Stk11ip	YES	0	0	0	0	0	0	0	1	0	0	0.519733	-0.634367	-0.5245	-0.0595667	0.522733
Stk11		0	1	0	1	0	0	0	1	1	0	0.143567	-0.595	-1.12627	-0.0255333	0.1565
Stfa1		0	0	0	0	0	1	0	0	0	0	0.143433	0.149933	0.1612	0.179067	0.2273
Steap4	YES	0	0	0	0	0	1	0	0	0	0	-0.0188667	0.307767	2.3527	2.62437	1.16473
Steap3	YES	0	0	1	1	0	0	0	0	0	0	-0.4772	-0.419467	-0.1371	0.518067	-0.142967
Stc2	YES	0	0	0	1	0	0	0	0	0	0	-0.324167	-0.4918	-1.2218	-0.682967	-2.09383
Stc1		0	0	0	0	1	1	0	1	0	0	-0.686133	-0.0864333	-0.533867	-1.04363	-0.628033
Stau2		0	1	0	0	0	1	0	0	0	0	-0.310267	0.371	-0.0894667	-0.716967	-0.802867
Stat3		0	0	1	1	0	0	0	1	1	0	0.411933	-0.5083	0.984767	1.3061	0.653167
Stard7	YES	0	0	0	0	0	0	0	0	1	0	-0.370533	-0.360033	-0.7252	-0.390567	-0.463333
Stard6		0	0	0	0	0	0	1	1	1	0	-0.2634	0.244433	0.0827	0.00936667	-0.0133333
Stard3nl		0	1	0	0	0	1	1	0	0	0	-0.0607333	0.246133	0.462633	-0.00636667	-0.2648
Stag1	YES	0	1	0	0	0	0	1	0	0	0	-0.969067	0.399467	0.2287	-1.29573	-0.340733
St8sia3	YES	0	0	0	0	0	0	0	0	1	0	-0.859333	0.249733	-1.36623	-0.7993	-1.00497
St8sia2		0	0	0	1	0	0	0	0	0	0	-0.0379667	0.7847	0.0144667	1.53583	0.4833
St7	YES	0	0	1	0	0	0	0	0	0	0	-0.0833	0.1034	-0.415733	-0.305033	-0.3392
St6galnac5	YES	1	0	0	0	0	0	0	0	0	0	-1.5027	-0.766467	-2.4756	-2.35103	-2.61433
St6galnac2	YES	0	0	0	1	0	0	0	0	0	0	-0.192867	-0.2463	-0.450467	-0.1807	-0.2302
St6gal2		0	0	0	0	1	1	0	0	0	0	-0.5184	0.0469333	-0.719233	-0.0623	-1.08143
St6gal1	YES	0	0	1	0	0	0	0	0	0	0	0.0636333	0.602867	0.1085	0.0532667	0.779433
St3gal2		0	0	1	0	0	0	0	0	0	0	0.319033	-0.676033	-1.1621	0.6524	-0.431133
St3gal2		0	0	0	0	0	0	0	0	1	0	0.234367	-0.423867	-0.8722	0.434267	-0.2905
Ssxb9		0	0	0	0	0	1	0	0	0	0	0.487933	0.396267	0.926367	0.373867	0.841
Ssxb5		0	0	0	0	0	1	0	0	0	0	0.220033	0.198133	0.2437	0.108233	0.185933
Ssxb3		0	0	0	0	0	1	0	0	0	0	0.0100667	-0.0148333	0.0954333	-0.1158	-0.1058
Ssxb2		1	0	0	0	0	1	0	0	0	0	1.38913	1.3801	2.84533	1.09723	2.17353
Ssxb10		0	0	0	0	1	1	0	0	0	0	0.880867	0.786067	1.6018	0.6663	1.32267
Ssxb1		1	1	0	0	1	1	0	0	0	1	0.3299	0.340967	0.720567	0.279	0.635167
Ssx9		1	0	0	0	0	1	0	0	0	0	0.9493	0.907233	1.86817	0.692033	1.76053
Ssty2		1	0	0	0	1	1	0	0	0	1	2.61847	3.27963	4.93933	2.5441	3.75267
Ssty1	YES	0	0	0	0	1	1	0	0	0	1	1.83683	2.47733	3.63123	1.51067	2.95817
Sstr3	YES	0	0	0	0	0	0	0	1	0	0	0.2861	-0.136533	0.179	0.104533	0.0815667
Sst	YES	0	0	0	1	0	0	0	0	0	0	-0.7104	-0.6079	-3.29613	-2.62843	-2.71377
Ssrp1	YES	0	0	1	0	0	0	0	0	0	0	-0.280833	-0.746833	-0.438367	-0.8104	-0.477367
Ssh2	YES	0	0	0	0	0	0	0	1	1	0	-0.108133	-0.582367	-1.23467	-0.5319	-0.773033
Ssfa2		0	1	0	0	1	0	1	0	0	0	-0.242233	-0.318967	0.736967	1.1168	0.753467
Ssbp2		0	0	0	0	1	1	0	1	0	0	0.3974	0.949067	-0.176967	0.595033	0.4394
Ssb		0	0	0	0	0	0	1	0	0	0	-1.23923	0.640433	0.3452	-1.52217	-1.28577
Srrm2		0	0	0	0	0	0	1	0	0	0	-0.124967	-0.611033	-0.7476	-0.6412	0.139267
Srrm1	YES	0	0	0	1	0	0	0	0	0	0	0.157133	-0.169067	-0.463833	-0.0122333	-0.1888
Srpr		0	0	0	0	0	0	0	1	0	0	0.0105	-0.600367	-0.0570333	0.662867	-0.343567
Srp9	YES	0	1	0	0	0	1	0	0	0	0	-0.5221	0.5275	0.653467	-0.0882	-0.386933
Srp19	YES	0	0	0	0	0	0	0	1	0	0	-0.563267	0.594633	0.353033	-0.6608	-0.601
Srp14		0	0	0	0	0	1	0	0	0	0	0.0411333	0.7897	0.640133	-0.00313333	0.133967
Sri	YES	0	0	0	0	1	0	0	0	0	0	0.335133	0.145067	0.651833	0.446267	0.882467
Srfbp1		0	0	0	0	0	1	0	0	0	0	-0.550767	-0.348367	-0.6965	-0.6807	-1.0065
Srebf2		0	0	1	0	0	0	0	0	0	0	0.204567	-0.286667	-0.839733	-0.1976	-0.000333333
Srebf1	YES	0	0	0	0	0	0	0	1	0	0	0.150733	-0.3422	0.276667	0.6152	1.26313
Srd5a2		1	0	0	1	0	1	0	1	0	0	0.0326333	0.0515667	0.0512	0.2565	0.445567
Src	YES	0	1	0	0	0	0	0	0	0	0	0.597033	-0.1337	-0.5893	-0.0493	0.132967
Sqrdl		0	0	0	0	0	0	1	0	0	0	0.364133	0.1219	0.776567	1.97497	0.7101
Spt2		0	0	0	0	1	1	0	0	0	1	0.294233	0.4594	0.6	0.241667	0.654933
Spsb3		0	0	0	0	0	0	0	1	0	0	0.2572	-0.5652	-0.922933	0.295833	-0.2312
Spry1		0	0	0	0	0	1	1	0	0	0	-1.16567	-2.7277	-2.92527	-3.0491	-3.23887
Sprr3		1	0	0	0	0	0	0	0	0	0	0.204667	0.192133	0.113933	0.356433	0.139767
Sprr2f		0	0	0	0	0	1	0	0	0	0	0.389967	0.587	0.698867	0.346167	1.05563
Sprr2d		0	0	0	0	0	1	0	0	0	0	0.539867	0.545667	1.01863	0.586967	1.21597
Sprr2a		0	0	0	0	0	1	0	0	0	0	0.551333	0.6981	1.40683	0.294	1.45557
Sprr1b		0	0	0	0	0	0	1	0	0	0	0.0472667	0.264367	0.298233	0.1294	0.3457
Sprr1a		0	0	0	0	0	1	0	0	0	0	0.380433	0.509133	0.7414	0.416767	0.497867
Spred1		0	0	0	0	0	0	0	0	1	0	-0.422433	0.154867	0.0568667	-0.6474	-1.6801
Spp1		0	0	0	0	0	1	0	0	0	0	0.156867	0.701233	1.10013	-0.112767	1.54047
Spon2		0	0	0	0	0	0	0	1	0	0	0.0204333	-0.0819667	0.0472667	0.0198	-0.165367
Spock3	YES	0	0	0	0	0	0	1	0	0	0	-0.834633	-0.00366667	-0.890467	-1.06623	-0.7821
Spock2		0	0	0	1	0	0	0	0	0	0	0.919367	-0.414667	-1.0268	0.7051	-1.44743
Spo11	YES	0	0	0	0	0	1	0	0	0	0	0.105467	0.0581333	0.230167	0.0704667	0.279667
Spnb2		0	0	0	0	0	0	1	0	0	0	0.470333	0.593033	0.880767	1.67723	0.6846
Spnb1		1	0	0	0	0	1	0	0	0	0	0.254867	-0.238833	-0.1169	0.342633	0.3472
Spint1	YES	0	0	0	1	0	0	0	0	1	0	-0.0518667	-0.0599667	-0.115667	0.1361	-0.135267
Spink3	YES	0	0	0	0	1	1	0	0	0	0	0.183133	0.446067	0.552267	0.330433	0.6218
Spink2		0	0	0	0	0	1	0	1	0	0	0.166267	0.124233	0.1455	0.0602667	0.294067
Spic	YES	0	0	0	0	0	1	0	0	0	0	0.190967	0.515233	0.577967	0.288833	0.3463
Spib	YES	0	0	0	0	0	0	0	1	0	0	0.157267	-0.159367	0.051	-0.0395	0.13
Sphk1	YES	0	0	0	0	0	0	0	1	0	0	-0.1575	-0.6289	-0.6513	-0.413767	-0.909267
Spg3a	YES	0	1	0	0	0	0	1	0	0	0	0.326	0.901967	-0.341167	0.399	-0.447967
Spg21		0	0	1	0	0	0	0	1	1	0	0.0887333	-0.104567	-0.264233	-0.2284	-0.174467
Spfh1		0	0	0	1	0	1	0	0	0	1	-0.6381	-0.4127	-0.483833	-0.7857	-1.2839
Speer4f	YES	0	0	0	0	0	1	0	0	0	1	0.286	0.257333	0.299267	0.173567	0.325933
Speer4d		0	0	0	0	0	1	0	0	0	0	1.0589	0.690133	1.22497	0.5791	1.09617
Speer4b	YES	0	0	0	0	0	1	0	0	0	1	2.1181	1.83363	3.95093	1.3401	2.61377
Speer4a	YES	0	0	0	0	0	1	0	0	0	1	1.69237	1.58897	4.0928	1.40827	2.71833
Speer3	YES	0	0	0	0	0	1	0	0	0	0	0.3125	0.234767	-0.113167	0.2553	0.146333
Speer2	YES	0	0	0	0	0	1	0	0	0	1	0.5734	0.167	0.664033	0.266567	0.5238
Spdef	YES	0	0	0	0	0	0	0	0	1	0	0.130633	-0.269433	-0.116333	-0.0206333	-0.093
Spcs2	YES	0	0	0	1	0	1	0	1	1	0	-0.0532667	0.6493	0.639367	0.0137333	0.279333
Spats2	YES	0	1	0	0	0	0	0	1	0	0	0.118	-0.413533	-0.5385	-0.0185667	-0.369767
Spata21		0	0	0	0	0	1	0	0	0	0	-0.0643	-0.3304	-0.4342	-0.0897	-0.1737
Spata19	YES	0	0	0	0	0	1	0	0	0	0	0.215667	0.135167	0.185967	-0.006	0.0838333
Sparc		0	0	0	0	0	0	0	1	1	0	0.905167	1.0552	2.5616	3.43007	1.6607
Spag6		0	0	0	0	0	0	1	0	0	0	-0.251667	0.222633	-0.4439	0.716367	-0.0759333
Spag5	YES	0	0	0	0	0	0	0	1	0	0	-0.758033	-1.33967	-1.8913	-1.84957	-1.01463
Spag4l		0	0	0	0	0	1	0	0	0	0	0.00416667	-0.0530333	0.121833	0.1046	0.250933
Spag11		0	0	0	0	1	1	0	0	0	1	0.0364333	0.0636667	-0.311233	-0.0687333	-0.088
Spaca1	YES	1	0	0	0	0	1	0	0	0	0	-0.0652333	-0.067	-0.1962	-0.1154	0.167267
Sp8		0	0	0	0	0	0	0	1	0	0	-0.7208	0.889567	-0.112767	-1.24917	0.733033
Sp7	YES	0	0	0	0	0	1	0	0	0	0	-0.00803333	-0.0655333	0.120133	0.693067	-0.0790333
Sp5		0	0	0	1	0	0	0	0	0	0	0.0546667	-0.145533	-0.362667	-0.183	0.0405667
Sp100		1	0	0	0	0	1	0	0	0	0	0.264767	0.2786	0.392867	0.089	0.242933
Sox8	YES	0	0	1	1	0	0	0	1	1	0	1.4488	0.328633	-1.16407	-0.736633	-0.360133
Sox4		0	0	1	0	0	0	0	1	0	0	0.821533	0.972667	0.180267	-0.0731	0.6644
Sox30		0	0	0	0	0	1	0	0	0	0	0.111033	0.0130333	0.0173333	0.0617667	0.3223
Sox3		0	0	0	1	0	0	0	0	0	0	0.401533	-0.756633	-1.44027	-0.763167	-0.9386
Sox2		0	0	1	0	0	0	0	0	1	0	0.3772	0.264833	0.391667	0.0629333	0.407867
Sox12		0	0	1	0	0	0	1	0	0	0	0.3599	0.133467	-0.4986	-0.2865	-0.0905667
Sox11	YES	0	0	1	1	0	0	0	1	1	0	-0.8806	0.991433	-0.740867	-2.01267	-0.406767
Sostdc1	YES	0	1	0	0	0	0	0	0	0	0	-0.5311	-0.261033	-0.1278	-0.166167	-0.00603333
Sos1		0	0	0	0	0	0	1	0	0	0	-0.636133	-0.567533	-0.4535	0.251533	-1.0456
Sorcs3	YES	0	0	1	1	0	0	0	0	1	0	0.167133	0.147333	-0.188833	-0.363133	-0.598333
Sorcs1	YES	0	0	0	1	0	0	0	0	1	0	-0.709	-1.46703	-0.0309	0.6387	-0.787867
Socs7		0	0	0	1	0	0	0	0	0	0	0.176033	-0.223333	-0.143067	0.360767	-0.0926
Socs4		0	0	0	1	0	1	0	0	0	0	-0.586067	-0.358633	-0.4617	0.0574	-0.8871
Socs1	YES	0	0	0	1	0	0	0	0	0	0	-0.0850667	-0.3626	-0.668367	-0.0917	-0.341467
Snx9		0	1	0	0	0	0	0	0	0	0	-0.411767	-1.1697	-0.883867	-0.4228	-0.615867
Snx4	YES	0	0	0	1	0	0	0	0	0	0	-0.0201	0.673167	0.846567	0.402633	-0.0541667
Snx17	YES	0	0	0	0	0	0	0	1	0	0	0.591433	-0.215667	-0.0771333	0.5592	0.2512
Snx16	YES	0	0	0	0	0	0	1	0	0	0	-0.804633	1.00787	0.1816	-0.8015	-0.8572
Snx14		0	0	1	0	0	0	0	0	0	0	-0.385367	0.7011	0.8417	-0.5388	-0.0475333
Sntg2		0	0	0	0	0	0	0	1	1	0	-0.1191	-0.25	0.139833	0.880267	0.642833
Sntg1	YES	0	1	0	1	0	0	0	0	0	0	-0.266967	0.332433	-0.430733	-0.413033	-0.216833
Sntb2		0	0	0	0	0	1	0	0	0	0	-0.384833	-0.346967	-0.318067	-0.472933	-0.4247
Snta1	YES	0	0	0	1	0	0	0	0	0	0	0.875767	0.8286	0.781633	2.3408	2.2564
Snrpn		0	1	0	0	0	1	1	0	0	0	0.237567	0.764267	-0.232833	0.2814	-0.341833
Snrpe		0	0	0	0	0	0	1	0	0	0	-0.425567	0.291667	0.2446	-1.90217	-0.380767
Snrpd1		0	0	0	0	1	1	1	0	0	0	-0.9603	0.1641	-0.312467	-2.06583	-1.0466
Snrpb2	YES	1	1	0	0	0	1	0	0	0	0	-0.265367	0.3961	0.813867	-0.0153667	-0.0120667
Snrp70		0	0	1	0	0	0	0	0	0	0	0.215767	-0.414033	-1.09017	-0.2478	-0.3297
Snf1lk2	YES	0	0	0	0	1	1	0	0	0	0	0.8921	-0.754767	-0.8054	1.2687	-0.191867
Snf1lk		0	0	0	1	0	0	0	0	1	0	-0.190433	-0.213133	-0.633033	-0.0593333	-0.418733
Sncaip		0	0	0	1	0	0	0	0	0	1	1.0978	1.39053	1.3858	0.799667	1.56243
Snapc4	YES	0	0	0	1	0	0	0	1	1	0	-0.6552	-0.5973	-1.4852	-1.17313	-1.04213
Snap25	YES	1	0	0	1	1	0	0	0	0	0	-0.500867	0.0291333	-0.5548	-0.2138	-0.363367
Snag1	YES	0	1	0	0	0	0	0	0	0	0	0.0814	0.961267	1.52257	0.194667	0.413233
Smyd3	YES	0	0	0	1	0	0	0	1	1	0	0.00593333	0.322567	-0.0824	0.289733	0.0987667
Smurf2		0	0	0	0	0	0	1	0	0	0	-0.1982	-0.0522333	0.0128333	0.0857333	-0.843767
Smurf1	YES	0	1	0	0	0	0	0	0	0	0	0.175367	-0.385067	-0.4177	0.804633	-0.347167
Smpd3	YES	0	0	0	1	0	0	0	0	0	0	0.137567	0.313233	-1.32273	-0.1318	-0.7931
Smox		0	0	0	0	0	0	1	0	0	0	1.64757	1.15317	1.03107	1.71797	1.2733
Smok3b		1	0	0	0	0	1	0	0	0	0	0.4165	0.3174	0.989867	0.323967	0.734733
Smo		0	0	0	1	0	0	0	0	0	0	-0.2082	-0.208033	-0.0822	-0.164833	0.346333
Smndc1	YES	0	0	0	1	0	0	0	1	1	0	-0.0925333	0.2889	0.194267	-0.279133	-0.160233
Smchd1		0	0	0	0	0	0	1	0	0	0	-1.0578	-0.285433	-0.307867	-0.990867	-1.1154
Smc6l1	YES	0	1	0	0	0	1	1	0	0	0	-1.5789	-0.0280333	-0.4225	-1.6123	-1.18157
Smc4l1		0	0	1	1	0	1	0	0	1	0	-2.4425	-1.1781	-1.10563	-2.66643	-2.03357
Smc1l1		0	0	1	0	0	0	0	1	1	0	-0.9416	-0.756133	-0.5138	-1.29233	-0.950967
Smarcd2	YES	0	0	1	1	0	0	0	0	1	0	-0.146667	-0.5057	-0.9554	-0.106733	-0.5923
Smarcc1		0	0	1	0	0	0	0	0	0	0	0.332767	-0.558567	-0.464833	-0.0845667	-0.150933
Smarcb1	YES	0	0	0	0	0	0	0	1	0	0	0.343967	-0.104333	-0.820567	-0.164967	0.0413667
Smarcal1		0	0	0	0	0	0	0	0	1	0	0.0489	-0.188233	-0.603767	-0.172167	-0.340033
Smarcad1	YES	0	0	0	0	0	0	1	0	0	0	-0.6371	0.771933	0.615333	-1.05937	-0.450167
Smarca3	YES	0	0	0	0	0	1	0	0	0	0	-0.839133	0.584467	-0.298367	-0.764267	-0.901367
Smarca2	YES	0	0	0	1	0	0	0	1	1	0	0.0550333	1.2856	0.8915	0.358233	-0.333567
Smarca1	YES	0	0	0	0	0	0	1	0	0	0	0.0967	1.06543	1.25483	0.1798	0.581767
Smap1l	YES	0	0	0	1	0	0	0	0	0	0	0.533033	-0.5458	-0.729767	0.6829	-0.149967
Smap1	YES	0	0	1	0	0	0	0	1	0	0	0.0312	0.3642	0.1322	0.0142	-0.369467
Smad7		0	0	0	1	0	0	0	0	0	0	-0.1258	0.338633	0.0782	0.428733	-0.251767
Smad5	YES	0	0	0	0	0	1	0	0	0	0	-0.279567	-0.0109	0.104367	-0.389533	0.231467
Smad4	YES	0	0	0	1	0	0	0	1	1	0	-0.138667	0.326033	-0.233933	-0.6679	0.0498
Smad2	YES	0	0	0	0	0	0	1	0	0	0	-0.2916	0.140867	-0.0549	-0.08	-0.420633
Sly	YES	1	0	0	0	0	1	0	0	0	0	0.7745	1.19247	1.40787	0.268233	1.60127
Sly	YES	1	0	0	0	0	1	0	0	0	0	0.7745	1.19247	1.40787	0.268233	1.60127
Slurp1	YES	0	0	0	0	0	0	0	1	0	0	-0.0307333	-0.3259	-0.3172	-0.0867	-0.138433
Sltm	YES	0	1	0	1	0	0	0	1	1	0	-1.0643	-0.175733	-0.571033	-0.7171	-0.995833
Sln		0	1	0	0	0	0	0	0	0	0	0.0938	0.0771	0.0121667	0.0163667	0.214467
Slk	YES	0	0	0	0	0	0	1	0	0	0	-0.920333	-0.5023	0.1545	0.210733	-0.878467
Slitrk5		0	1	0	0	0	0	0	0	0	0	0.00936667	0.685933	0.449667	-0.300167	-0.2809
Slitrk3		0	0	1	0	0	0	0	1	0	0	0.436067	0.2004	-0.0238	0.1362	-0.296967
Slitrk1	YES	0	1	1	1	0	0	0	0	0	0	0.505167	0.0273	-1.62687	-0.0277	-0.8489
Slit3	YES	0	0	0	0	0	1	0	0	0	0	-0.0404667	-0.125033	-0.775767	0.161567	-0.3169
Slfn8		0	0	0	0	1	0	0	0	0	1	-0.6758	-0.253233	-0.156733	-0.0888333	-0.0097
Slfn4		1	0	0	0	0	1	0	0	1	0	0.122033	0.0460333	0.0251667	-0.183567	0.135233
Slfn2		0	0	0	1	0	0	0	1	0	0	0.0138333	-0.0609	-0.2064	-0.0417667	-0.2666
Slco2b1	YES	0	0	0	0	0	0	0	1	0	0	0.0686333	-0.111267	0.249467	-0.148967	0.4108
Slco1a4		0	0	0	0	0	0	1	0	0	0	0.114367	0.431433	1.23463	3.7615	1.33913
Slc8a2	YES	0	0	0	1	0	0	0	1	1	0	0.359267	-1.06143	-0.644033	1.0824	-0.5308
Slc8a1	YES	0	0	0	0	0	0	1	0	0	0	-0.5397	0.0653667	0.0582667	0.2075	-0.0929667
Slc7a8		0	0	1	0	0	1	1	1	0	1	0.444367	0.156	0.144967	1.18213	0.00616667
Slc7a14	YES	0	0	0	0	0	0	0	1	0	0	-0.206333	0.176733	0.272333	0.740833	-0.2274
Slc7a11		0	0	0	0	0	0	1	0	0	0	-1.06577	0.806833	0.2501	-1.22603	-0.1144
Slc7a10		0	0	1	0	0	0	0	0	0	0	-0.195967	-0.432967	-0.7188	-0.4996	-0.632633
Slc6a5	YES	0	1	0	1	0	0	0	0	0	0	0.0595	0.152767	0.207333	-0.0208	0.2352
Slc6a4	YES	0	0	0	1	0	0	1	1	1	0	0.2292	0.2639	0.837533	0.299067	0.5829
Slc6a2		0	0	0	1	0	0	0	0	0	0	0.0942333	-0.117667	-0.0672667	0.118733	-0.0366333
Slc6a19	YES	0	0	0	0	0	0	0	1	0	0	0.426333	0.1742	0.2846	0.993867	0.249967
Slc6a17	YES	0	0	0	1	0	0	0	0	0	0	-0.00376667	-0.3376	-1.26923	-0.120167	-1.1835
Slc6a1	YES	0	0	0	1	0	0	0	0	1	0	-0.373733	-0.0632	-0.0786667	-1.15507	-0.788233
Slc5a4b	YES	0	0	0	0	0	1	0	0	0	0	0.155933	0.332333	0.0746333	0.108867	0.2299
Slc5a3		0	0	1	0	0	0	0	0	0	0	-0.597233	-1.09963	-0.0188333	1.72327	-0.530067
Slc5a2	YES	0	0	0	0	0	0	0	1	0	0	0.1165	-0.131867	-0.121933	0.0022	-0.0434333
Slc5a12		0	0	0	0	0	1	0	0	0	0	-0.0953667	0.186167	0.3788	-0.0062	0.920333
Slc5a11	YES	0	0	0	0	0	0	0	1	0	0	0.0737	-0.1182	-0.0513	-0.0116	0.005
Slc4a1ap		0	0	0	0	0	1	0	0	0	0	0.0655667	-0.0935667	-0.1528	0.344	-0.513267
Slc4a10		0	0	0	0	0	0	1	0	0	0	-0.520667	0.301267	-0.592967	-0.5081	-0.633833
Slc45a1	YES	0	0	1	0	0	0	0	0	0	0	0.246767	-0.1394	-1.3156	0.106467	-1.07213
Slc44a3	YES	0	0	0	1	0	0	0	0	0	0	-0.0912667	0.219633	1.56363	2.41963	0.9553
Slc3a2		0	0	0	0	0	0	0	1	0	0	0.0649667	-0.1073	0.2551	0.326533	0.116833
Slc3a1		0	0	0	0	0	1	0	0	0	0	-0.0471667	-0.188333	-0.457467	-0.0328333	-0.188133
Slc39a3	YES	0	0	0	0	0	0	0	0	1	0	0.505367	0.355933	-0.4783	0.1026	0.183933
Slc39a10		0	0	0	0	0	0	1	0	0	0	-0.385667	-0.1649	-0.205933	-0.383233	-0.954933
Slc38a4		0	0	0	0	0	1	0	0	0	0	0.0994	0.1479	0.423533	0.0957	0.429233
Slc38a2	YES	0	0	0	0	0	0	0	1	0	0	-0.2885	0.262	-0.5134	-0.9032	-0.5157
Slc37a1		1	0	0	0	0	1	0	1	1	0	0.0057	-0.226533	-0.169567	1.0666	0.828833
Slc36a3		0	0	0	0	0	1	0	0	0	0	0.163067	-0.0650667	0.240467	0.206067	0.203167
Slc35f4	YES	0	0	0	1	0	0	0	0	0	0	0.123533	0.304733	-0.278367	0.1264	-0.019
Slc35f1	YES	0	0	0	0	0	0	0	0	1	0	-0.728567	0.5753	0.226033	-0.606367	-1.09447
Slc35d1		0	0	1	0	0	0	0	1	1	0	0.1757	-0.175733	0.722167	1.48803	0.779533
Slc35a3	YES	0	0	0	0	0	1	0	0	0	0	-0.741633	-0.479	0.490833	-0.3072	-0.581733
Slc31a2	YES	0	1	0	0	0	0	0	0	0	0	-0.137467	0.203133	0.398033	0.690467	-0.0345
Slc30a9	YES	0	0	0	1	0	0	0	1	1	0	-0.3691	0.1408	-0.457533	-0.0261667	-0.436967
Slc30a5		0	0	0	1	0	0	0	1	0	0	-0.0882	0.1985	0.676267	0.0732	0.0263
Slc30a4		0	0	0	0	0	0	1	0	0	0	-0.681667	0.315867	0.788867	-0.0765333	-0.0489333
Slc30a3	YES	0	0	0	0	0	0	0	1	0	0	-0.0849	-0.2428	-0.6618	-0.0649	-0.423967
Slc30a1		0	0	1	0	0	0	0	0	0	0	-0.0908	1.2173	0.698867	0.093	-0.702433
Slc2a6		0	0	0	0	0	0	0	1	0	0	0.0457	-0.544833	-0.923233	-0.403333	-0.7763
Slc2a12		0	0	0	0	0	1	0	0	0	0	-0.134833	0.246	-0.163033	-0.0431	0.0284
Slc2a10	YES	0	0	0	0	0	0	0	1	0	0	-0.207333	-0.553733	-0.403967	-0.2366	-0.727667
Slc29a3	YES	0	0	0	1	0	0	0	0	1	0	0.920933	0.302733	1.2112	1.83757	0.682133
Slc29a2	YES	0	0	0	0	0	0	0	0	1	0	-0.356667	-0.6072	-0.9235	-0.548867	-0.780867
Slc26a9	YES	0	0	0	1	0	0	0	1	0	0	-0.0045	-0.113267	-0.117367	0.154333	-0.00193333
Slc26a11	YES	0	0	1	0	0	0	0	1	1	0	-0.296867	-0.207533	-0.164433	0.293367	-0.2301
Slc25a4		0	0	0	1	0	0	0	1	1	0	-0.5337	-0.185	-0.240467	0.126267	-0.505333
Slc25a36		0	1	0	0	0	0	0	0	0	0	-1.14657	0.370167	-0.493533	-1.2418	-1.59813
Slc25a3		0	0	0	0	0	0	1	0	0	0	-0.183867	-0.8113	-0.617467	-0.101467	-0.280867
Slc25a28		0	0	0	0	0	0	0	0	1	0	-0.267333	-0.912167	-1.48923	-0.309067	-0.522233
Slc25a20	YES	0	0	0	0	0	0	0	1	0	0	0.376333	-0.0256	0.238033	0.866733	0.343167
Slc25a17	YES	0	0	0	0	0	0	0	1	0	0	-0.0531	-0.0675667	-0.163467	0.0586667	-0.3334
Slc25a15		0	0	0	1	0	0	0	1	1	0	-0.3217	-1.12527	-0.846533	-0.149433	-0.807
Slc25a12		0	0	1	0	0	0	0	0	0	0	-0.2304	-0.0258	-0.0625667	0.144933	-0.566033
Slc24a6	YES	0	0	1	0	0	0	0	0	0	0	0.661333	0.0321	-0.324933	1.00897	1.21
Slc24a4	YES	0	0	0	1	0	0	0	0	1	0	1.60773	1.54913	2.0704	4.36163	2.60967
Slc23a2		0	1	0	0	1	1	0	0	0	0	0.2006	0.247467	0.0900667	0.262767	-0.320033
Slc22a6		0	0	0	0	0	1	0	0	0	0	0.167033	-0.0320333	0.236333	-0.0695	0.1977
Slc22a3	YES	0	0	0	1	0	0	0	0	0	0	0.0823667	0.0995	0.0677667	0.0710333	0.00253333
Slc22a20		0	0	0	1	0	0	0	1	1	0	-0.0328333	-0.113167	-0.151533	-0.0855	-0.0538
Slc22a18		0	0	0	0	0	1	0	0	0	0	0.132667	-0.107467	0.0153667	0.706867	-0.000433333
Slc22a1		0	0	0	0	0	1	0	0	0	0	0.263767	-0.0474	0.291	0.2635	0.327833
Slc20a2	YES	0	1	0	0	0	0	1	0	0	0	0.0956333	-0.102	0.864233	0.673967	0.9767
Slc1a7	YES	0	0	0	1	0	0	0	0	1	0	0.0266333	-0.149733	-0.126433	0.1593	0.0269333
Slc1a3		0	0	1	0	0	0	0	0	0	0	0.00483333	1.43103	2.23627	1.0456	0.4588
Slc19a2		0	0	1	0	0	0	0	0	0	0	-0.955167	-0.755933	-0.605633	-1.29867	-1.9013
Slc18a3	YES	0	0	0	1	0	0	0	1	1	0	-0.00216667	-0.105133	-0.548333	-0.0825	-0.196733
Slc18a2	YES	0	0	0	0	0	0	0	1	0	0	-0.949033	-0.0334667	-0.435833	-0.6695	-0.695567
Slc17a8		0	0	0	0	1	0	0	0	0	0	0.124833	0.165833	0.113	0.0293333	0.0644667
Slc17a7		0	0	1	0	0	0	0	0	0	0	-0.00536667	0.000366667	-1.6409	-0.3703	-1.26243
Slc17a6	YES	0	1	1	1	0	0	1	0	0	0	-0.678733	0.3202	-1.17513	-0.995233	-0.838567
Slc17a1	YES	1	0	0	0	0	1	0	0	0	0	0.166133	0.0654333	0.172667	-0.058	0.116467
Slc16a2		0	0	0	0	0	0	0	1	0	0	-0.186933	-0.701967	0.0792333	0.659767	0.399133
Slc16a13	YES	0	0	1	0	0	0	0	0	0	0	0.3768	-0.689133	-0.999967	-0.433233	-0.267033
Slc16a11	YES	0	0	0	1	0	0	0	1	0	0	0.0984	-0.322533	-0.3878	0.11	-0.161667
Slc16a1	YES	0	1	0	0	0	0	0	0	0	0	-0.312467	-0.122467	-0.0935	0.0960333	0.127167
Slc15a4	YES	0	0	0	0	0	1	0	0	0	0	-0.0449	-0.398533	-0.399967	-0.0970667	-0.164133
Slc15a3		0	0	0	0	0	0	0	1	0	0	0.0233	-0.0832	-0.3393	-0.0707333	-0.159067
Slc15a2		0	1	0	0	0	0	0	0	0	0	-0.0601667	1.13267	0.824067	-0.271467	0.115433
Slc14a2	YES	0	0	0	0	1	0	0	0	0	0	1.26203	0.867333	1.76957	1.7163	1.96883
Slc13a5	YES	0	0	0	1	0	0	0	0	0	0	0.0443333	-0.2518	-0.616533	-0.391	-0.566333
Slc13a3	YES	0	0	0	0	0	0	0	1	0	0	0.2372	0.474733	-0.290967	-0.4163	-1.20163
Slc12a6	YES	0	0	0	0	1	1	0	0	0	1	-0.118033	0.476567	0.146333	-0.143067	-0.206467
Slc12a5	YES	1	1	1	1	0	0	0	1	1	0	-0.5543	-0.0363667	-1.39217	-0.3531	-1.7488
Slc12a2		0	0	1	0	0	0	0	0	0	0	-0.789967	0.103467	1.4939	0.3706	-0.264567
Slc10a5		0	0	0	0	0	0	0	1	0	0	0.132867	0.0995333	0.103067	0.0943333	0.444567
Ski		0	0	0	0	0	0	0	1	0	0	-0.00316667	-0.627467	-0.813833	1.0822	0.257467
Six6os1	YES	0	0	0	1	0	0	0	1	1	0	0.0675667	-0.0920333	-0.1372	-0.2275	0.0544667
Six5	YES	0	0	1	0	0	0	0	0	0	0	0.177367	-0.0352667	-0.97	-0.503567	-0.0721
Siva	YES	0	0	1	0	0	0	0	1	1	0	-0.457633	-0.6184	-1.30877	-1.37033	-0.894067
Sit1		0	0	0	0	0	0	0	1	0	0	0.172	-0.193067	-0.157	-0.0513333	-0.0462
Sirt5		0	0	0	0	0	0	0	1	0	0	-0.243567	-0.0375667	-0.576133	-0.0469	-0.3466
Sirt2	YES	0	0	0	0	0	0	0	1	0	0	1.15137	1.29907	1.7861	2.30383	1.20227
Sirt1		0	0	1	1	0	0	0	1	1	0	-0.640233	0.4303	0.697233	-0.6686	-0.6327
Sin3b		0	0	0	0	0	0	0	1	1	0	-0.451433	-0.774267	-1.37043	-0.616733	-0.567067
Siglecg		0	0	0	1	0	0	0	0	1	0	0.160933	0.327367	0.4048	0.200733	0.5779
Siah2	YES	1	0	0	0	0	0	0	0	0	0	-0.155633	-0.3727	-0.229	-0.0657	-0.5435
Siah1b		0	0	0	1	0	0	0	1	1	0	-0.267	-0.0707	-0.278633	-0.293	0.0803667
Siah1a		0	1	0	0	0	0	0	0	0	0	-0.1618	0.7201	0.2107	-0.288167	0.188
Siae	YES	0	0	0	0	0	1	0	0	0	0	0.0828	-0.146333	0.5882	0.254467	0.5669
Shox2	YES	0	1	0	0	0	0	0	0	0	0	-0.221333	-0.184367	-0.713533	-0.1494	-0.6281
Shmt2		0	0	1	0	0	0	0	0	0	0	-0.101267	-0.9305	-1.4356	-0.836167	-1.0404
Shkbp1	YES	0	0	0	0	0	0	0	1	0	0	0.518567	-0.409367	-1.14773	0.0744	0.0510667
Shfm1		0	0	0	0	1	0	1	0	0	0	-0.645367	0.2778	-0.222633	-1.4299	-0.5183
Shcbp1		0	0	0	1	0	0	0	0	0	0	-1.72587	-1.62917	-2.11223	-2.9244	-1.97617
Shc3	YES	0	0	0	0	1	1	0	0	0	0	-0.0658333	-1.34807	-1.84203	-0.0469	-2.6922
Shc1		0	0	1	0	0	0	0	0	0	0	-0.0047	-0.3938	-0.347867	0.354133	0.286533
Shank3	YES	0	0	1	0	0	0	0	0	1	0	0.0857667	-0.3676	-0.855033	0.5284	-0.611667
Sh3md1	YES	0	0	1	0	0	0	0	0	0	0	-0.0849	-0.2901	-0.313533	-0.0599333	-0.0810667
Sh3glb2	YES	0	0	0	0	0	1	1	0	0	0	0.131167	-0.189767	-1.0067	0.521133	-0.1151
Sh3bp2	YES	0	0	0	1	0	0	0	1	1	0	-0.431233	-0.5311	-1.6839	-0.304367	-1.15377
Sh3bgrl3		0	0	0	1	0	0	0	0	1	0	0.458367	-0.0893	-0.270967	0.183567	0.0263667
Sh3bgrl		0	1	0	0	1	0	0	0	0	0	-1.825	0.724567	0.9181	-1.13727	-1.1275
Sh2d1c		0	0	0	0	1	0	0	0	0	0	0.199233	0.141833	0.209133	0.1249	0.410933
Sh2bp1		0	1	0	0	0	0	0	0	0	0	0.274533	-0.186667	-0.0316667	0.185133	-0.1055
Sgta	YES	0	0	1	0	0	0	0	0	0	0	0.355733	-0.5307	-0.9037	0.124433	-0.00566667
Sgpp1	YES	0	0	1	0	0	0	0	0	0	0	-0.6337	0.440667	0.8335	-0.450967	-0.660233
Sgpl1		0	0	0	1	0	0	0	1	1	0	0.3569	0.291033	0.594833	0.4702	0.8268
Sgol1		0	0	1	0	0	0	0	0	0	0	-1.26927	-1.90467	-1.9528	-2.2529	-1.4601
Sgk		0	0	0	1	0	0	0	0	0	0	0.661	1.42847	0.679833	0.3216	0.442833
Sgcg	YES	0	0	0	0	1	1	0	0	0	0	0.0942667	0.0903333	0.424867	0.8491	1.57257
Sfxn1	YES	1	0	0	0	0	1	0	0	0	0	-0.473467	-0.224233	-0.0102667	-0.896367	-0.822733
Sftpc	YES	0	0	0	0	0	0	0	1	0	0	0.3276	-0.157033	0.614067	0.4615	0.573667
Sftpa1		0	0	0	1	0	0	0	1	1	0	0.292733	0.253033	0.305833	0.325667	0.2235
Sfrs6	YES	0	0	0	0	0	0	1	0	0	0	-0.917067	0.139333	-0.1376	-1.4978	-0.501267
Sfrs14	YES	0	1	1	1	0	0	0	1	0	0	-0.0279667	-0.528967	-1.3097	-0.274533	-0.668267
Sfrs12		0	0	0	0	0	1	0	0	0	0	-1.1879	0.213833	0.0775667	-1.00407	-1.04113
Sfrs11		1	0	0	0	1	1	0	0	0	0	-0.6447	0.3438	0.1284	-0.927833	-0.504267
Sfrs1		0	1	0	0	0	0	0	0	0	0	-1.34163	0.0383667	-0.113367	-1.58447	-1.0566
Sfrp5	YES	0	0	0	0	0	0	0	0	1	0	0.0234333	-0.3818	-0.227667	1.10333	-0.0589667
Sfpq		0	0	0	0	0	0	1	0	0	0	-0.323733	-0.7364	-0.520067	-1.38257	-0.459633
Sfmbt1	YES	0	1	0	0	0	0	0	0	0	0	-0.145067	-0.554367	-0.955367	-0.104133	-0.562767
Sf4	YES	0	0	0	0	0	0	0	1	0	0	0.609533	-0.0915333	-0.370067	0.140733	0.205167
Sf3a2		0	0	1	0	0	0	0	1	0	0	1.38927	-1.18953	-1.45607	0.901633	-0.0437667
Sf1	YES	0	0	1	0	0	0	0	0	0	0	0.310533	-1.17777	-1.3273	-0.0195667	-0.4007
Sez6l2	YES	0	1	1	1	0	0	0	0	0	0	-0.0470333	-0.3665	-2.135	0.233533	-1.32293
Setmar		0	0	0	0	0	1	0	0	0	0	0.2545	0.1796	-0.1622	0.0259667	-0.0472
Setdb1		0	0	0	1	0	0	0	0	1	0	-0.2301	-0.4349	-0.6664	-0.807767	-0.150133
Sestd1		0	0	0	0	0	0	0	0	1	1	-0.1179	0.143533	-0.548167	-0.587867	-0.864867
Sesn3		0	1	0	0	0	0	0	0	0	0	1.10277	0.309667	0.599667	1.12387	0.820833
Sesn1		0	0	0	0	0	0	1	0	0	0	0.714267	1.13763	0.915433	1.33193	1.27937
Serpinf1		0	0	0	0	0	0	0	0	1	0	-0.209833	-0.128533	-0.276333	-0.124567	-0.0873
Serpine1	YES	0	0	1	0	0	0	0	1	1	0	0.0107	-0.00353333	-0.165	-0.00643333	-0.0836
Serpinb9f		0	0	0	0	0	1	0	0	0	0	0.464667	0.816667	1.0573	0.464233	1.17667
Serpinb9e		0	0	0	0	0	1	0	0	0	0	0.5554	0.635833	0.8289	0.259533	0.995067
Serpinb9d	YES	1	0	0	0	0	0	0	0	0	0	0.241033	0.1979	0.259133	-0.0182667	0.283267
Serpinb9		0	0	0	0	0	0	0	1	0	0	0.159667	0.310567	0.3664	0.0938667	0.106267
Serpinb7	YES	0	0	0	0	0	0	1	0	0	0	0.4256	0.864933	0.8508	0.310267	1.26713
Serpinb3b		0	0	0	0	0	1	0	0	0	0	0.321967	0.707567	1.02947	0.3937	0.958933
Serpinb3a		0	0	0	0	1	1	0	0	0	0	0.3942	0.515467	0.8622	0.378533	1.01063
Serpinb1c		0	0	1	0	0	0	0	0	0	0	0.0135333	-0.1079	-0.0816	-0.278133	-0.102867
Serpinb10	YES	0	0	0	0	0	1	0	0	0	0	0.2633	0.3712	0.471833	0.421967	0.678033
Serpina3h		0	0	0	0	0	0	1	0	0	0	0.0540667	-0.1951	3.7125	3.7978	1.6794
Serpina3c		0	0	0	0	0	0	0	1	0	0	0.274967	0.312367	0.9452	0.5043	0.467367
Serpina10	YES	0	0	1	0	0	0	0	0	0	0	0.0236333	0.0654333	0.0270667	-0.0281	0.0379333
Serinc3		0	0	0	0	0	0	0	1	0	0	-0.3832	0.676867	1.0169	0.330767	-0.300233
Serinc1		0	0	1	0	0	0	0	0	0	0	-0.117733	0.977933	1.30857	0.6938	-0.0688667
Serf2		0	0	1	0	0	0	0	0	0	0	0.5543	0.7458	0.927633	1.14733	0.956333
Serf1		0	0	0	0	0	1	1	0	0	0	0.254233	1.83773	0.6932	-0.8987	0.4614
Sepx1		0	0	1	0	0	0	0	0	0	0	0.465633	-0.121967	-0.2679	0.6859	0.482633
Sept7		0	0	0	0	0	0	1	0	0	0	-1.2606	0.806867	0.9494	-1.19137	-1.26117
Sept6	YES	0	0	0	0	0	0	0	1	1	0	0.0562	0.0604667	-1.0498	-0.9988	-1.4906
Sept5		0	0	0	0	0	0	0	1	0	0	1.1382	0.223633	-0.932367	1.01243	-0.189433
Sema6b	YES	0	0	0	1	0	0	0	1	1	0	0.839	0.2291	-0.701633	0.0368667	0.0724667
Sema4f		0	0	0	0	0	0	1	0	0	0	0.140833	0.0390667	-0.546833	0.547033	-0.3589
Sema4d	YES	0	0	0	1	0	0	0	1	1	0	-0.138133	-0.305667	0.175067	0.982	-0.194467
Sema4a	YES	0	0	0	0	0	0	0	1	0	0	0.688533	0.539033	-0.392767	0.578533	-0.0913667
Sema3g		0	0	0	1	0	0	0	0	1	0	0.296033	-0.163067	0.7588	0.3609	0.586067
Sema3b	YES	0	0	0	0	0	0	0	1	0	0	-0.0447333	-0.104967	-0.4122	1.20083	0.652433
Sema3a		0	0	0	0	0	0	1	0	0	0	-0.997167	-0.262167	-1.23667	-1.68907	-0.9971
Selp		0	0	0	0	0	1	0	0	0	1	0.2013	0.238167	0.543233	0.373367	0.394767
Sele		0	0	0	0	0	1	0	0	0	0	-0.1887	-0.0704667	0.1176	-0.1046	0.123933
Seh1l		0	0	0	0	0	0	1	0	0	0	-0.778667	-0.0429667	-0.129733	-1.26853	-0.896267
Sec63	YES	0	0	0	1	0	0	0	0	1	0	-0.452667	0.1008	0.8766	0.2299	-0.686233
Sec61b	YES	0	0	0	0	0	1	0	0	0	0	-0.0634667	0.535467	0.144467	-0.665367	0.182167
Sec24c		0	0	1	0	0	0	0	0	0	0	0.6381	-0.269333	-0.2625	0.442433	-0.213667
Sec24b		0	0	0	1	0	0	0	0	0	0	-0.137533	-0.212733	-0.406767	-0.3534	-0.234667
Sec23b		0	1	0	0	0	0	1	0	0	0	0.2803	-0.251933	0.1083	0.493	0.2013
Sec22l3		0	0	0	1	0	0	0	0	1	0	0.1824	-0.3555	-0.4225	0.2765	-0.652067
Sec22l2	YES	0	1	0	0	0	0	0	0	0	0	-0.162567	-0.0941	-0.503533	-0.1023	-0.186967
Sec14l1		0	0	0	0	0	0	0	1	0	0	0.350967	-0.69	-0.480067	1.0363	-0.0154
Sdsl	YES	0	0	0	1	0	0	0	0	1	0	-0.0659	-0.0557	-0.0621333	0.433667	0.232633
Sdpr		1	0	0	0	0	0	1	0	0	0	-0.0401	-0.114167	-0.2158	-0.165367	-0.197233
Sdf4	YES	0	1	1	1	0	0	0	0	0	0	0.672733	0.8997	1.04443	1.43127	1.2161
Sdccag8		0	0	1	0	0	0	0	1	0	0	-0.4507	0.560033	0.0524333	-0.489533	-0.4713
Sdcbp	YES	0	1	0	0	0	0	0	0	0	0	-0.603933	0.231433	0.740667	0.578967	0.129
Sdc4		0	0	0	0	0	1	0	0	0	0	0.39	0.742767	2.9477	3.75083	2.18157
Sdad1	YES	0	0	0	0	0	0	0	1	0	0	-0.7872	-0.140233	-0.433333	-1.24453	-0.7139
Scyl1bp1		0	0	0	0	0	0	1	0	0	0	-0.4049	0.127333	-0.3186	-0.3571	-0.871067
Scx		0	0	1	1	0	0	0	1	1	0	0.0197667	-0.274	-0.558167	0.0434	-0.4265
Scube3		0	0	0	1	0	0	0	0	0	0	0.1414	-0.257033	-0.443333	0.768167	-0.125867
Sctr	YES	0	0	1	0	0	0	0	0	1	0	0.227167	-0.0906	-0.120533	0.2668	0.142367
Scrt1		0	0	0	0	0	0	0	1	0	0	0.489167	0.361633	-1.6391	0.0678333	0.0276667
Scrn3		0	0	0	0	0	0	1	0	0	0	-0.359533	0.158433	0.240933	0.0307667	-0.622533
Scpep1		0	0	0	0	0	0	1	0	0	0	-0.0866667	-0.7604	-0.807433	-0.568167	-0.643667
Sco1		0	0	0	0	1	0	0	0	0	0	-0.510467	-0.306467	-0.427767	-0.562467	-0.5987
Scn8a	YES	0	0	0	0	0	0	0	1	0	0	-0.536867	0.231533	-1.0447	-0.176633	-0.879333
Scn7a		0	0	0	0	0	1	0	0	0	0	0.0350333	0.269333	0.666667	0.568833	0.802333
Scn3b	YES	0	0	1	1	0	0	0	1	0	0	-0.320033	0.327167	-1.31763	0.404967	-1.17297
Scn2b		0	0	0	0	0	1	0	0	0	0	-0.156967	-0.0866	-0.567533	-0.105967	-0.5657
Scn11a	YES	0	0	0	0	0	1	0	0	0	0	-0.0043	-0.234067	-0.1068	-0.138933	-0.0905667
Scmh1	YES	0	0	1	1	0	0	0	1	1	0	-0.00266667	-0.2191	-0.933667	-0.1298	-0.567933
Scin		1	0	0	0	0	1	0	0	0	0	-0.0385667	0.00923333	-0.139667	-0.1267	0.2467
Schip1		0	0	0	0	0	0	1	0	0	0	-0.3304	-0.245167	-0.179667	0.5497	0.015
Scgn	YES	0	1	1	1	0	1	0	0	0	0	-0.160267	0.318433	-0.437833	-0.568167	0.596333
Scg3	YES	1	1	1	1	0	0	0	0	0	0	0.714167	1.82837	2.84813	2.48833	1.18057
Scg2		0	1	1	1	0	0	0	0	1	0	0.1397	0.193433	-0.763433	0.843667	-1.82417
Scfd1		0	0	0	0	0	1	0	0	0	0	-0.421833	0.189433	0.5919	-0.0473667	-0.6467
Sccpdh		0	0	0	0	0	0	1	0	0	0	-0.0623667	0.647367	0.9977	0.1921	-0.168433
Scarf1		0	0	0	0	0	0	0	1	0	0	-0.111433	-0.1578	-0.224	-0.0424	-0.1055
Scarb1		0	0	1	1	0	0	0	1	1	0	-0.0743	-1.93743	-2.298	-1.36693	-1.98827
Scamp5	YES	0	0	0	1	0	0	0	0	0	0	0.883167	0.644467	0.191767	0.4907	0.256567
Scamp2	YES	0	0	1	0	0	0	0	0	0	0	0.835833	0.0701	0.364033	0.8303	0.626233
Sc4mol		0	0	0	0	0	0	1	0	0	0	-0.3217	0.5078	0.205033	-0.365733	-0.773733
Sbsn	YES	0	0	0	0	0	0	0	1	0	0	0.1012	-0.052	-0.0226667	0.188067	0.3444
Satb2	YES	0	0	1	0	0	0	1	1	0	0	-0.253733	-0.355733	-1.1401	-0.0365667	-0.771833
Satb1	YES	0	0	0	0	0	0	0	1	0	0	-0.1141	0.149933	-0.468967	-0.740333	0.00163333
Sass6		0	0	0	0	0	0	1	0	0	0	-0.9737	-0.767033	-1.2631	-0.978533	-1.58733
Sash1		0	0	0	1	0	0	0	0	1	0	0.389567	0.939267	1.40317	0.49	0.9737
Sart2		0	0	1	0	0	0	0	0	0	0	-0.399067	0.0622	-0.100033	0.3917	-0.455833
Sars		0	0	1	0	0	0	0	0	0	0	0.660933	-0.392567	-0.674033	0.7332	-0.3481
Saps1		0	0	1	0	0	0	0	1	0	0	0.318733	-0.302833	0.2234	0.604033	0.672533
Sap18		0	1	0	0	0	0	0	0	0	0	-0.6151	-0.5426	-0.327767	-0.824567	-0.577
Samsn1		0	0	0	0	0	0	1	0	0	0	0.143	0.2538	0.0751667	0.0689667	0.1282
Samd6		0	0	0	0	0	0	0	1	0	0	-0.0200667	-0.1887	-0.706467	-0.2937	-0.234667
Samd4		0	0	0	1	0	0	0	0	1	0	-0.442967	-0.677833	0.299333	2.44873	-0.251933
Samd10		0	0	1	0	0	0	0	0	1	0	0.1946	0.0112667	-1.219	-0.291333	-0.388133
Safb2		0	0	1	1	0	0	0	1	0	0	0.130367	-0.476433	-0.778433	0.203633	-0.105267
S69381		0	0	1	1	0	0	0	0	0	0	0.299467	-0.1045	0.1011	0.0155	0.384367
S100a6		0	0	0	0	0	0	0	1	1	0	0.0830667	0.1871	0.712467	2.23943	0.2719
S100a16		0	0	0	0	0	0	0	1	0	0	0.775733	1.22337	1.28	1.9991	0.898467
S100a15		0	1	0	0	0	0	0	0	0	0	0.0784667	0.0593	-0.0611667	0.0821667	0.0136
S100a14		0	0	0	0	0	0	0	1	0	0	0.319167	0.2051	0.155067	0.756267	0.0699667
S100a13		0	0	0	0	0	0	0	0	1	0	-0.0167333	-0.0903	0.7361	1.0996	0.0667667
S100a10		0	0	0	0	0	0	1	0	0	0	-0.3097	-1.203	0.526233	1.3324	-0.847767
Ryr2	YES	0	0	0	1	0	0	0	0	0	0	-0.9797	-0.419967	-1.07597	-0.6277	-0.826033
Rybp	YES	0	1	0	0	0	0	0	0	0	0	-0.7445	0.381033	0.354867	-0.623667	-0.675767
Rxrip110		0	0	0	0	0	0	1	0	0	0	-0.0256	0.152633	0.3623	-0.114833	0.259433
Rxrg		0	0	1	0	0	0	0	0	0	0	-0.428533	-0.553567	-1.66357	-0.8697	-1.1308
Rwdd4a		0	0	0	0	0	1	0	0	0	0	-0.5337	0.6721	0.589833	-0.941233	-0.366267
Rwdd3	YES	0	1	0	0	0	1	0	0	0	0	-0.349533	0.611967	0.0835667	-0.257367	0.267567
Runx3		0	0	0	1	0	0	0	0	0	0	-0.0869	-0.325	0.0672667	-0.104767	-0.0713333
Runx2		0	1	1	0	0	0	0	0	0	0	-0.113133	0.0415333	-0.0593333	-0.00706667	-0.0813667
Rtcd1	YES	0	0	1	1	0	0	0	0	1	0	-0.2384	-0.205167	-0.386733	-0.455	-0.4099
Rsu1	YES	0	0	0	0	0	1	0	0	0	0	0.343933	0.1398	0.5993	1.51233	0.625
Rshl2	YES	0	0	0	0	0	1	0	0	1	1	0.0615	-0.0001	-0.316133	-0.0104333	-0.156233
Rshl1		0	0	0	0	0	0	0	1	1	0	0.0892667	-0.186133	-0.425	0.1755	-0.113533
Rsad2	YES	0	1	0	0	0	0	0	0	0	0	-0.411767	-0.359733	-0.3422	-0.275067	-0.319733
Rrh	YES	1	0	0	0	0	0	0	0	0	0	0.1751	-0.0393	0.300033	0.143	0.135267
Rragb		0	0	0	0	0	1	1	0	0	0	-0.253833	0.114833	0.0136	-0.102033	-1.02097
Rqcd1		0	0	1	1	0	0	0	0	0	0	-0.224033	-0.9113	-0.984967	-0.767133	-0.613667
Rpusd4		0	0	0	0	0	1	0	0	0	0	-0.0895333	-0.387467	-1.0147	-0.245067	-0.653733
Rps7	YES	0	0	1	0	0	0	0	0	0	0	-0.0349333	0.5906	-0.571767	-1.49447	-0.447133
Rps6ka5	YES	0	0	1	1	0	0	0	1	0	0	-0.4883	0.0652333	-0.5822	-0.2587	-0.518733
Rps6ka2	YES	0	0	0	0	0	0	0	1	1	0	0.640133	0.201533	-0.205933	-0.187767	0.6098
Rps6		0	0	1	1	0	0	0	0	0	0	-0.0613	-0.184333	-0.7657	-1.2691	-0.8355
Rps5	YES	0	0	1	0	0	0	0	0	0	0	0.351967	-0.116633	-1.20657	-1.33567	-0.431267
Rps17		0	0	1	0	0	0	0	0	0	0	0.000966667	0.5143	-0.2958	-1.6706	-0.481267
Rps15	YES	0	0	1	0	0	0	0	0	0	0	0.445033	0.346033	-0.594367	-1.38133	-0.1599
Rps12	YES	0	0	1	0	0	1	0	0	0	0	-0.1912	0.448667	-0.663567	-2.04897	-0.528533
Rprml		0	0	0	1	0	0	0	0	0	0	0.0910667	0.00243333	-0.662967	0.0100667	-0.1747
Rprc1		0	0	1	0	0	0	0	1	0	0	0.108	-0.2863	0.1217	1.0021	0.407567
Rpp40	YES	0	0	0	0	0	0	0	0	1	0	-0.274467	0.0802333	-0.179833	-0.0581	-0.0211667
Rpp38		0	0	1	1	0	0	0	1	0	0	-0.631767	-0.116833	-0.181767	-0.736333	-0.423733
Rpp14		0	0	1	0	0	0	0	0	0	0	-0.104367	0.583	0.437367	-0.434467	-0.187133
Rpo1-4		0	0	0	1	0	0	0	0	1	0	-0.376767	-1.34713	-1.0945	-0.113867	-0.349933
Rpo1-3		0	0	0	0	0	0	0	1	0	0	0.2775	0.205967	-0.533367	-1.11123	-0.4573
Rpn1	YES	0	0	0	0	0	0	1	0	0	0	0.0253333	-0.0901667	0.199233	0.108433	0.188333
Rpl38	YES	0	1	0	0	0	0	0	0	0	0	0.0812	0.874433	0.1792	-1.39463	-0.1013
Rpl37	YES	0	0	0	0	0	1	0	0	0	0	-0.1182	0.4356	-0.238	-0.880533	0.0275333
Rpl35	YES	0	0	1	1	0	0	0	1	1	0	-0.0395667	0.718033	-0.183267	-1.7971	-0.447467
Rpl32		0	1	0	0	0	0	0	0	0	0	0.142633	0.2452	-0.590367	-2.0445	-0.6456
Rpl31		0	0	0	0	0	0	0	0	1	0	-0.144733	0.309333	-0.0059	-1.2847	-0.431267
Rpl28		0	0	1	0	0	0	0	0	0	0	0.237833	0.1916	-0.5493	-1.34203	-0.496433
Rpl26		0	1	0	0	0	1	0	0	0	0	0.264833	0.593267	-0.3932	-1.13937	-0.3598
Rpl22l1	YES	0	0	0	0	0	1	0	0	0	0	-0.415233	0.0675	-0.217967	-1.58167	-0.879633
Rpl22	YES	0	0	0	1	0	0	0	0	1	0	0.5026	0.636167	0.023	0.530133	-0.138667
Rpl17		0	0	1	0	0	0	0	0	1	0	-0.0699667	0.185433	-0.0197333	-1.09287	-0.625567
Rpl15		0	0	0	0	0	1	0	0	0	0	-0.0094	0.1244	-0.619833	-1.4899	-0.331267
Rph3a	YES	0	0	0	1	0	0	0	0	0	0	0.8688	-0.299833	-1.57687	-0.5064	-0.818733
Rpgr		0	1	0	0	0	0	0	0	0	0	-0.7699	0.6999	0.771	-0.0476333	-0.251367
Rp1h		0	1	0	0	0	1	0	0	0	0	0.305367	0.578033	0.409767	0.339167	0.530633
Ros1		0	0	1	0	0	0	0	0	0	0	0.221333	0.303533	0.468533	0.1787	0.602433
Rorc		0	0	0	0	0	0	0	0	1	0	0.0256667	-0.0125667	-0.0136667	0.0247333	-0.0726667
Ropn1l	YES	0	0	0	1	0	0	0	0	0	0	0.0238	-0.1809	-0.392967	-0.0647667	-0.326467
Ropn1	YES	0	0	0	0	0	0	0	0	1	0	0.111367	0.0322333	0.100633	0.00916667	-0.0419667
Rod1	YES	0	1	0	0	0	0	1	0	0	0	-0.528933	-0.506267	-0.602633	-0.708467	-0.572233
Rock2		0	1	0	0	0	0	0	0	0	0	-1.5667	-0.306933	0.0708667	-0.449733	-1.60873
Rock1		0	0	1	0	0	0	0	0	0	0	-1.53603	0.3601	0.486933	-0.744033	-1.60963
Robo1		0	0	0	1	0	0	0	0	0	0	-0.3663	0.8791	-0.2801	-1.44373	-1.28083
Rnps1	YES	0	0	1	0	0	0	0	1	0	0	-0.1247	-0.671	-1.1915	-0.680667	-0.7589
Rnpepl1		0	0	1	1	0	0	0	0	1	0	0.569833	-0.4572	-0.7501	0.201867	0.1793
Rnpep		0	0	0	0	0	0	1	0	0	0	0.5923	-0.494367	-0.302667	1.0456	0.440333
Rnpc1	YES	0	0	0	0	0	0	0	1	0	0	0.309133	-0.989633	-1.63643	-0.432833	-0.195367
Rnmt		0	0	0	0	0	1	0	0	0	0	-0.485967	0.182433	-0.307967	-0.4519	-0.951633
Rnf8		0	0	0	1	0	0	0	1	1	0	0.274667	-0.1681	-0.6128	-0.117667	-0.301767
Rnf6		0	0	0	0	0	0	0	1	0	0	-0.8571	0.5623	0.459167	-0.286533	-0.193067
Rnf40		0	0	0	1	0	0	0	0	1	0	0.605033	-0.4477	-0.790833	0.416533	0.163267
Rnf4		0	0	0	0	0	0	1	0	0	0	-0.204633	-0.6105	-0.618533	-0.1944	-0.480567
Rnf36	YES	0	0	1	0	0	0	0	0	1	0	0.0842333	-0.0772	0.0760667	-0.0338667	0.0007
Rnf31	YES	0	0	0	1	0	0	0	0	1	0	0.502633	-0.3664	-0.739333	0.442867	0.0555333
Rnf19		0	1	0	0	0	1	1	0	0	0	-0.183167	0.2083	-0.139167	0.0004	-0.599033
Rnf182		0	0	0	0	0	0	1	0	0	0	0.0187333	0.0737	-0.4746	0.343533	0.761133
Rnf170	YES	0	1	1	1	0	0	0	1	1	0	-0.602767	0.332067	0.0756	0.1251	-0.6431
Rnf152		0	0	0	1	0	0	0	0	1	0	-0.921367	-0.142833	-0.775333	-0.364733	-1.1351
Rnf150		0	1	0	0	0	0	0	0	0	0	-0.193533	0.169267	-0.304967	-0.221533	-0.495667
Rnf149		0	0	0	0	0	0	1	0	0	0	-0.2029	0.297633	0.3936	-0.2413	-0.5569
Rnf146	YES	0	0	0	0	1	1	0	0	0	1	-0.3167	0.4378	0.478667	-0.0912	-0.215767
Rnf14	YES	0	0	0	0	1	0	0	0	0	0	-0.0167	0.315	-0.0132333	0.2875	-0.649867
Rnf128		0	0	0	0	0	0	1	0	0	0	-0.236233	-0.0861667	-0.1306	-0.3436	-0.332533
Rnf125	YES	0	0	0	1	0	0	0	0	1	0	-0.0734	0.164967	0.204467	-0.152033	0.2465
Rnf121		0	0	0	0	0	0	0	1	0	0	-0.0981667	-0.1529	-0.138333	-0.00796667	-0.159433
Rnd3		0	0	0	1	0	0	0	0	1	0	0.173933	1.4608	0.707933	1.01633	1.1589
Rnd1		0	0	1	1	0	0	0	0	1	0	0.270133	0.2168	0.542833	0.0933667	0.340267
Rnase6		0	0	0	0	0	0	0	1	1	0	0.212333	0.332333	0.7162	0.205667	0.616067
Rit2		0	1	0	0	0	1	0	0	0	0	-0.432467	0.785833	-0.764633	-0.2592	-0.738333
Ripk2		0	0	0	1	0	0	1	1	1	0	-0.451233	-0.0505	-0.1538	-0.3718	-0.556567
Riok1		0	0	0	0	0	0	0	1	0	0	-0.256033	0.1953	-0.0887	-0.390467	-0.6585
Rin1	YES	0	0	0	0	0	0	0	0	1	0	-0.264667	-0.481633	-0.482233	-0.181567	-0.466733
Rims1	YES	0	0	0	0	0	0	0	1	0	0	-0.815933	-0.3359	-1.68473	-0.2695	-1.64113
Ric3	YES	0	0	0	0	0	1	0	0	0	0	0.154967	0.741433	0.797633	0.248233	-0.0037
Rhpn1		0	0	0	0	0	0	0	1	0	0	0.118267	-0.164767	-0.6421	0.2674	0.134867
Rhox9		0	0	0	0	0	0	0	1	0	0	0.0101333	-0.0713	0.120567	-0.0926667	0.0401667
Rhox4h		1	0	0	0	1	1	0	0	0	0	1.0781	1.08697	2.20407	1.08027	2.25507
Rhox4d		0	0	0	0	0	1	0	0	0	0	1.09517	1.00897	2.20027	1.16027	2.2915
Rhox4c		1	0	0	0	0	0	0	0	0	0	1.2312	1.11153	2.14773	1.03873	2.36127
Rhox4a		0	0	0	0	0	1	0	0	0	0	1.19243	0.9893	2.15683	1.2387	2.25897
Rhox3		1	0	0	0	0	1	0	0	0	0	0.9346	0.692233	1.5182	1.1021	1.89477
Rhox2		0	0	0	0	0	1	0	0	0	0	0.789633	0.822633	1.2883	0.7376	1.5285
Rhou		0	1	0	0	0	0	0	1	1	0	0.0075	0.631633	1.06673	0.927867	1.1151
Rhob	YES	0	0	0	1	0	0	0	1	0	0	0.559533	0.7376	1.0868	1.6889	0.953233
Rhoa		0	0	1	0	0	0	1	0	0	0	0.412767	0.0444667	0.358767	0.4813	0.192533
Rho		0	0	0	0	0	0	0	0	1	0	-0.111533	-0.1231	0.0613	-0.224133	-0.0642667
Rheb	YES	0	0	0	0	0	0	0	0	1	0	0.201167	0.367833	0.6895	0.140467	0.721867
Rhag		0	1	0	0	0	1	0	0	0	0	0.3328	0.533267	0.483133	0.0072	0.593433
Rgs7	YES	0	0	0	0	0	0	0	0	1	0	-0.730767	-0.622833	-0.6177	-1.41817	-2.00103
Rgs6	YES	0	0	0	0	1	0	0	0	0	0	0.2195	0.0118	0.328733	1.30903	1.20577
Rgs2		0	0	0	0	0	0	1	0	0	0	-0.101433	0.5303	0.5938	0.8808	1.3096
Rgs18		0	0	0	0	0	1	0	0	0	0	0.116133	0.1681	0.109733	-0.0953	0.187833
Rgs17	YES	0	0	0	0	0	1	0	0	0	0	-0.4617	0.400067	-0.313167	-0.1152	-1.52143
Rgs16		0	0	1	0	0	0	0	1	1	0	-0.281333	-1.10373	-0.716967	-0.930767	-1.01493
Rgs13		0	0	0	0	1	0	0	0	0	0	-0.171133	-0.0572667	-0.181133	-0.1997	-0.0310333
Rgs1		1	0	0	0	0	0	0	0	0	0	0.244867	0.584033	0.532433	0.171	0.8066
Rgnef	YES	0	0	0	1	0	0	0	0	0	0	-0.2127	-0.0644333	0.0414333	0.259467	-0.201133
Rgl2	YES	0	0	1	0	0	0	0	0	1	0	-0.186767	-0.909667	-1.66747	-0.873667	-0.6419
Rgag4		0	0	1	1	0	0	0	0	1	0	0.1147	-0.0366333	-0.7532	-0.437567	-0.6847
Rfxdc1		0	0	0	0	0	1	0	0	0	0	0.2248	0.1278	0.347567	0.0500333	0.4095
Rfx2	YES	0	0	0	1	0	0	0	1	1	0	-0.160633	-0.401833	-0.6612	0.6881	0.7794
Rfwd2		0	0	0	0	0	0	1	0	0	0	-0.758267	0.7627	0.853533	-0.327567	-0.499833
Rffl		0	0	0	0	1	0	0	0	0	0	0.0986667	0.111367	0.5879	1.40913	-0.228533
Rexo2	YES	0	0	1	0	0	0	0	1	0	0	-0.221267	-0.3463	0.287133	0.285867	0.0831
Rex2		0	0	0	0	1	1	0	0	0	1	1.18243	2.1094	3.0939	0.930667	2.80373
Rev3l	YES	0	0	0	0	0	0	0	1	0	0	-1.04017	0.224667	0.0848667	-1.49873	-1.4527
Rev1l		0	0	0	0	0	0	0	1	0	0	-0.5195	-0.156267	-0.473667	-0.844433	-0.960533
Retnlg		0	0	0	0	1	0	0	0	0	0	0.139967	0.383733	0.285533	0.0653	0.330733
Retnlb		0	0	0	0	1	0	0	0	0	0	0.0983667	0.0032	-0.233367	-0.0527	-0.143367
Retnla		0	0	0	0	0	1	0	0	0	1	0.2473	0.306	0.201	-0.0381	0.443567
Retn		0	0	0	0	0	0	0	1	0	0	0.113167	0.0335	0.193633	0.178	0.0821333
Rer1	YES	0	0	0	1	0	0	0	0	0	0	-0.0854333	0.0821	0.153467	-0.2639	-0.00933333
Rent1		0	0	1	1	0	0	0	0	0	0	0.8815	-0.7407	-0.351533	0.7469	0.0511
Ren2		0	0	0	0	0	0	0	1	0	0	0.0944333	-0.1656	0.110967	0.216467	0.00186667
Relb		0	0	1	0	0	0	0	0	0	0	0.4371	-0.506133	0.0471	1.07463	0.682633
Rel		0	0	0	0	0	0	0	0	1	0	-0.321433	-0.485067	-0.271933	0.3856	-0.0880333
Rdx	YES	0	0	0	0	0	0	1	0	0	0	-0.920633	0.1273	0.747267	-0.512133	-0.3826
Rdm1	YES	0	0	1	0	0	0	0	0	0	0	-0.230767	-0.593167	-1.52493	-1.09417	-0.7781
Rdh14	YES	0	0	0	0	1	0	0	0	0	0	-0.1937	0.547833	0.4172	0.306767	0.1608
Rcn3	YES	0	0	1	0	0	0	0	0	0	0	-0.182567	-0.845133	-1.46787	-0.465	-1.9922
Rcl1		0	0	0	1	0	0	0	0	0	0	-0.179	-1.11153	-1.1582	-0.512733	-0.753067
Rchy1	YES	1	0	1	0	0	1	0	0	0	0	-0.0427333	0.109667	-0.0144667	-0.309633	-0.5248
Rccd1		0	0	0	1	0	0	0	0	1	0	-0.390133	-0.227867	-0.905267	-0.436667	-0.860067
Rbpms2		0	0	0	1	0	0	0	1	1	0	-0.533	-1.43557	-1.10103	-0.1604	-0.450067
Rbp4	YES	0	1	0	0	0	0	0	0	0	0	-0.00123333	-0.220167	-0.1854	-0.200033	-0.0996333
Rbp1	YES	0	0	0	0	0	0	0	1	0	0	0.140867	0.0608667	0.124333	0.0737	0.268
Rbmy1a1		0	1	0	0	0	1	1	0	0	0	0.231767	0.461867	0.1782	0.0121333	0.430633
Rbms1	YES	0	0	0	0	0	0	0	1	0	0	-0.8411	0.162867	1.14783	1.36437	0.346867
Rbm6	YES	0	1	0	0	0	0	0	0	0	0	-0.6269	0.6152	-0.0896	-0.843967	-0.4118
Rbm4	YES	1	0	0	0	0	1	0	0	0	0	-0.190267	0.105033	-0.386533	-0.335	-0.339767
Rbm34		0	0	1	0	0	0	0	0	0	0	-0.353567	0.0651667	-0.0530333	-0.233533	-0.552833
Rbm28	YES	0	0	0	0	0	1	0	0	0	0	-0.2106	-0.943633	-0.407267	0.369033	-0.4055
Rbm13		0	0	0	0	0	0	1	0	0	0	-0.646067	-0.303133	-0.4456	-1.08813	-1.2275
Rbm11		1	0	0	0	0	1	0	0	0	0	-0.0616667	0.2139	-0.3043	0.0884667	-0.1847
Rbl1	YES	0	0	0	1	0	0	0	0	1	0	-1.01723	-1.0908	-1.53127	-1.74963	-1.1491
Rbbp7		0	0	0	1	0	0	0	0	0	0	-0.7644	-0.35	-0.4637	-0.722433	-0.5886
Rbbp6	YES	0	1	0	0	0	1	0	0	0	0	-0.810833	0.0191	-0.358133	-1.03383	-0.889733
Rbbp6	YES	0	0	0	1	0	0	0	0	1	0	-0.0314333	1.40937	1.11027	-0.0494667	0.157967
Rb1cc1		0	0	0	0	0	1	0	0	0	0	-0.684167	0.9237	0.733167	-0.330667	-0.320633
Rb1		0	1	0	0	0	0	0	0	0	0	-0.579233	0.847533	1.1	-0.136733	-0.323967
Rassf2	YES	0	0	0	1	0	0	0	1	1	0	0.2715	0.388033	0.732833	0.316367	0.182533
Rasip1		0	0	0	0	0	0	0	1	0	0	-0.4591	-0.367	-1.14783	-0.191633	-0.945667
Rasgrp2		0	0	0	1	0	0	0	1	0	0	-0.4411	-0.2585	-1.05923	0.0942667	-0.5963
Rasgrf2		0	0	0	0	0	0	0	0	0	1	0.0955667	0.288267	-0.0716667	0.0582667	-0.0911
Rasd1	YES	0	0	0	1	0	0	0	1	1	0	-0.169867	-0.3124	-0.1982	-0.0441667	-0.262567
Rasa4		0	0	0	1	0	0	0	1	1	0	-0.00276667	-0.177833	-0.4875	0.0332333	-0.211533
Rarsl	YES	0	0	1	0	0	0	0	0	0	0	-0.718433	-0.0943333	-0.178933	-0.391567	-0.455767
Rarres2	YES	0	0	0	1	0	0	1	1	1	0	0.508533	0.1535	0.216767	1.4121	0.305267
Rarg	YES	0	0	1	1	0	0	0	1	1	0	0.1751	-0.2522	-0.769967	1.58213	-0.463567
Rarb	YES	0	0	1	0	0	0	0	0	0	0	-0.963467	0.0829667	-1.0771	-0.459267	-0.425067
Rap2ip	YES	0	0	0	1	0	0	0	0	0	0	0.676767	0.258967	-0.7733	0.0399	0.161067
Rap2b	YES	0	0	0	0	0	0	1	0	0	0	-0.437733	-0.260033	0.0892333	-0.4164	-1.1453
Rap2a		0	0	1	0	0	0	0	0	0	0	0.128033	0.537333	0.593767	0.215133	-0.0609667
Rap1b		0	0	0	0	0	0	0	1	0	0	-1.08367	0.0372667	0.483167	-0.4776	-0.740967
Ranbp9		0	1	0	0	1	0	1	0	0	0	0.085	0.576167	1.06043	0.110867	-0.0298667
Ranbp5		0	0	0	0	0	0	0	1	0	0	-0.683133	-0.906467	-0.867967	-1.4286	-0.939467
Ranbp3	YES	0	0	1	0	0	0	0	0	0	0	0.182067	-0.815567	-1.5145	-0.103667	-0.0979333
Ranbp17	YES	0	0	1	0	0	0	0	0	1	0	-0.4767	-0.4416	-0.6135	-0.377667	-0.606967
Ramp1	YES	0	0	0	0	0	0	0	1	1	0	-0.2601	-0.6533	-1.3098	-1.22453	-1.0388
Ralgps2		0	0	0	0	1	0	0	0	0	0	-0.2276	-0.609067	-1.11137	0.223933	-0.960067
Ralbp1	YES	0	0	0	1	0	0	0	0	0	0	-0.0025	-0.0798667	-0.1007	0.6769	0.2786
Rala	YES	0	1	0	0	0	0	0	0	0	0	-0.5471	0.612667	0.403833	-0.0745	-0.3372
Rai2		0	0	0	0	0	0	1	0	0	0	-0.239533	-0.5947	-0.911033	0.6065	0.4111
Rai14		0	0	0	1	0	0	0	0	0	0	-0.8772	-0.3139	-1.09353	-1.01487	-1.14503
Rai1	YES	0	0	0	0	0	0	0	0	1	0	0.28	-0.0665	-0.431567	0.135733	0.396967
Rag1ap1		0	0	0	1	0	0	0	1	1	0	-0.189067	-0.3597	-0.309533	-0.0500667	-0.195233
Rag1		0	0	0	0	0	0	1	0	0	0	0.0217333	0.197533	-0.111533	-0.0290333	0.0694333
Raet1e		0	0	0	0	0	1	0	0	0	0	0.170267	-0.311567	0.113667	-0.296167	0.166567
Raet1b		0	0	0	0	0	1	0	0	0	0	-0.803467	-0.8781	-0.650033	-1.35573	-0.387433
Rae1	YES	0	0	0	1	0	0	0	1	0	0	-0.017	-0.264667	-0.8116	-0.311167	-0.3775
Rad54l		0	0	0	0	0	1	0	0	0	0	-1.26603	-2.17323	-2.559	-2.15203	-1.16147
Rad51l1	YES	0	0	0	0	0	0	0	0	1	0	0.00976667	-0.127533	0.178333	-0.461267	-0.112667
Rad23b		0	0	1	0	1	0	1	1	0	0	-0.151133	-0.352733	-0.1292	-0.0685	-0.512033
Rad23a	YES	0	1	1	1	0	0	0	1	0	0	-0.164633	-0.861967	-1.1486	-0.391433	-0.709467
Rad21	YES	0	1	1	0	0	0	0	0	0	0	-0.720167	-0.8871	-0.7304	-1.1539	-0.481767
Racgap1	YES	0	0	0	0	0	0	0	1	0	0	-0.9425	-2.7578	-3.12827	-2.6862	-1.1879
Rac3		0	0	0	1	0	0	0	0	0	0	0.128133	0.270167	-0.970767	0.2399	-0.838967
Rac2	YES	0	1	0	0	0	0	1	0	0	0	-0.0063	-0.1548	0.199233	-0.239733	0.00583333
Rac1		0	1	0	0	0	0	0	0	0	0	0.1452	0.128667	0.5132	0.4758	0.2123
Rabl3		0	0	0	0	0	0	1	0	0	0	0.243233	-0.0154667	-0.0770333	-0.2517	-0.417033
Rabl2a		0	0	0	0	0	0	0	0	1	0	-0.0394667	0.0376667	0.0728	0.176033	0.4352
Rabif		0	0	0	1	0	0	0	0	1	0	0.0862667	0.0494333	-0.2818	-0.0413	-0.282667
Rabggtb		0	0	0	0	0	0	0	0	0	1	-0.648533	-0.128733	-0.149567	-0.5815	-0.9224
Rabgap1	YES	0	0	0	0	0	1	0	0	0	0	-0.0995333	0.5394	0.399533	0.0844333	-0.1202
Rabep1		0	0	1	0	0	0	0	0	0	0	-0.6982	0.283633	0.2251	-0.348767	-1.0394
Rab8b		0	0	1	0	0	0	0	0	0	0	-0.949333	0.1479	0.343333	-1.36	-1.28793
Rab8a		0	0	1	0	0	0	0	0	0	0	0.163533	-0.173933	-0.610067	0.0599333	-0.324833
Rab6		0	0	1	1	0	0	0	1	1	0	-0.2336	1.17963	1.50637	-0.0853333	-0.497833
Rab5c	YES	0	0	1	0	0	0	0	0	0	0	-0.211233	-0.241767	0.411567	-0.3851	-0.0641667
Rab40c	YES	0	0	1	0	0	0	0	0	0	0	0.295033	-0.308233	-0.910933	0.0565333	-0.146733
Rab3ip	YES	0	1	0	0	0	0	0	0	0	0	0.1417	0.259167	-0.415967	-0.7908	-0.2261
Rab3gap1		0	0	0	0	0	0	0	1	1	0	0.101967	0.3212	0.563667	0.216133	0.254967
Rab3c		0	0	0	1	0	0	0	0	0	0	-0.993933	-0.0334333	-1.3408	-0.736733	-1.707
Rab39		0	0	0	1	0	0	0	0	0	0	-0.241033	0.0732667	-0.4096	-0.662733	-0.342267
Rab35	YES	0	1	0	0	0	0	0	0	0	0	0.0292	-0.85	-0.818133	0.069	-0.0129333
Rab28	YES	0	0	0	1	0	0	0	0	0	0	-0.2499	0.0249667	0.0721667	-0.224267	-0.3869
Rab25		0	0	0	0	0	0	0	1	1	0	-0.0859	-0.0690667	-0.173067	0.0583333	-0.1056
Rab23		0	0	1	0	0	0	0	0	0	0	-0.2799	-0.134	-0.328333	0.0138333	-0.250167
Rab22a	YES	0	0	1	0	0	0	0	0	0	0	-0.3201	-0.0280333	0.2523	0.0867	-0.109867
Rab21		0	0	0	0	0	0	1	0	0	0	0.00406667	0.261067	1.01137	0.7759	0.0973667
Rab20	YES	0	0	0	1	0	0	0	0	1	0	-0.476367	-0.459	-0.798367	-0.656867	-0.433367
Rab1b	YES	0	0	1	0	0	0	0	0	0	0	0.4737	-0.625967	-1.09257	0.358633	0.3008
Rab18		0	0	1	0	0	0	0	0	0	0	-0.366433	0.5931	0.902433	0.1097	-0.407533
Rab14	YES	0	1	0	0	0	0	0	0	0	0	-0.261367	0.785367	1.18833	0.2457	-0.175133
Rab11fip4	YES	0	0	1	0	0	0	0	0	0	0	1.13623	-0.435333	-0.854733	2.5179	-0.5877
Rab11fip2		0	0	0	0	0	0	0	0	1	0	-0.5948	0.6997	0.6032	-0.0769	-0.673767
Qtrtd1		0	0	0	0	0	1	0	0	0	0	-0.3798	-0.303033	-0.462033	-0.0491667	-0.267533
Qk		0	1	0	0	0	0	1	0	0	0	-0.453367	1.0572	1.72707	-0.488033	-0.2769
Pycrl		0	0	1	0	0	0	0	0	0	0	0.0595333	-0.25	-0.8828	-0.248333	-0.2706
Pycr2		0	1	0	0	0	0	0	0	0	0	-0.165167	-0.6213	-0.7064	-0.0882	-0.5823
Pxmp3		0	0	0	0	0	0	1	0	0	0	-0.295933	0.584567	0.689533	-0.2402	0.0211667
Pxdn		0	0	0	1	0	0	0	0	0	0	0.0662333	-0.316	-0.9337	-0.0101	-0.0355
Pwwp2	YES	0	1	0	0	0	0	0	1	0	0	0.107033	-0.364033	-0.519567	0.017	-0.186933
Pwp2h	YES	0	0	1	1	0	0	0	1	1	0	-0.1156	-0.731633	-1.24347	-0.526033	-0.6868
Pvrl3		0	0	0	0	0	0	0	0	1	0	-0.342667	-0.244133	0.208	1.1054	0.107767
Pvrl1	YES	0	0	0	0	0	0	0	1	0	0	0.3552	-0.519633	-0.523533	0.320933	-0.410267
Pvr	YES	0	0	0	0	0	1	0	0	0	0	-0.236	-0.541133	-0.305933	0.3677	-1.14903
Pus7		0	0	0	0	0	0	1	0	0	0	-0.290967	-0.5131	-0.1803	-0.335533	-0.439
Pus3	YES	0	0	1	1	0	0	0	0	0	0	-0.541133	0.665867	0.484633	-0.422	-0.1072
Purg		0	0	1	1	0	0	0	1	1	0	-0.1305	0.203233	-0.0204667	0.2573	0.2269
Purb		0	0	0	1	0	0	0	1	1	0	-0.581467	-0.832767	-0.804167	0.369767	0.0885667
Pum1		0	0	0	1	0	0	0	0	0	0	0.178933	0.189933	0.0873333	-0.383467	-0.0166
Ptx3	YES	0	0	0	0	0	0	0	1	0	0	-1.04967	-0.605833	-1.11753	-0.0896	-0.4
Ptprn2	YES	0	0	0	1	0	0	0	0	0	0	-0.504667	-0.342633	-0.821533	-0.00156667	-0.5108
Ptprn	YES	0	0	0	1	0	0	0	0	0	0	-0.103267	-0.364567	-0.9104	-0.217667	-1.0504
Ptprm	YES	0	0	0	0	0	0	0	1	0	0	-0.507	-0.571933	-0.5327	0.738067	-0.5973
Ptprg	YES	0	0	0	1	0	0	0	0	0	0	-0.231333	-0.503033	-1.23263	-0.858033	-1.7376
Ptprf	YES	0	0	1	0	0	0	0	0	0	0	0.303367	-0.239467	0.0655	1.79733	0.724667
Ptprd	YES	0	0	1	0	0	1	0	0	0	0	-0.948267	0.6883	0.266067	0.414333	-1.12423
Ptprcap	YES	0	0	0	0	0	0	0	1	1	0	-0.0615667	-0.259067	-0.349767	0.0253333	-0.139533
Ptprc	YES	0	0	0	0	1	1	0	0	0	1	0.1511	0.185233	0.381533	0.218533	0.380767
Ptpra	YES	0	0	0	0	0	1	0	0	0	0	0.0897	0.59	0.722367	0.285867	0.5849
Ptpns1	YES	0	0	0	1	0	0	0	0	0	0	0.241167	-0.422567	-0.3888	1.25047	0.664567
Ptpn9	YES	0	0	0	1	0	0	0	0	1	0	-0.0574333	-0.221667	-0.140767	-0.0166667	-0.592267
Ptpn4		0	0	0	0	0	0	1	0	0	0	-1.22737	-0.641167	-0.703867	-0.332	-1.3613
Ptpn13	YES	0	0	0	0	1	1	0	0	0	0	-0.115	0.0141667	0.326933	0.816567	1.2297
Ptpmt1	YES	0	1	0	0	0	0	0	0	0	0	-0.106133	0.174733	0.245933	0.436	0.0460667
Ptp4a3	YES	0	0	1	0	0	0	0	0	0	0	-0.0437	-0.2871	-0.0795	0.0469	-0.258533
Ptp4a2		1	0	0	0	1	1	0	0	0	0	-0.582333	0.2897	0.185167	-0.334033	-0.487867
Ptk9	YES	0	1	0	0	0	0	0	0	0	0	-0.3544	0.610067	0.779233	-0.211067	0.108033
Ptk2		0	0	0	0	0	0	0	0	1	0	-0.164333	0.6089	0.395633	-1.02733	0.0370667
Pthr1	YES	0	0	0	0	0	0	1	0	0	0	-0.720833	-0.296867	-0.305433	-0.0736333	-0.8729
Pthlh		0	0	0	0	0	1	0	0	0	0	-0.0061	-0.1075	-0.715467	-0.0316	-0.177267
Ptgs2		0	0	0	0	0	0	0	0	0	1	0.3534	1.0523	0.3647	0.126933	0.0439667
Ptgs1	YES	0	0	0	1	0	0	0	0	0	0	-0.0949	-0.1366	-0.132267	0.3456	-0.0999
Ptgis		0	0	0	0	0	0	0	0	1	0	-0.320567	-0.525933	-0.679533	-0.5401	-0.470167
Ptgfrn	YES	0	1	0	1	0	0	0	1	1	0	-0.358167	-0.609033	-0.551833	-0.6802	-0.913167
Ptgfr		0	0	0	0	0	1	0	0	1	0	-0.0542333	-0.1195	0.0446333	-0.2758	-0.0692333
Ptgds		0	0	0	1	0	0	0	1	1	0	0.0595333	-0.0652667	2.0218	1.7154	1.112
Ptdss1		0	0	0	0	0	0	0	1	0	0	0.269433	0.2742	0.374167	0.439267	0.147
Ptch1		0	0	1	0	0	0	0	0	0	0	1.27137	0.115567	0.5429	1.31217	0.151567
Ptbp2		0	0	0	1	0	1	0	0	0	0	-0.454933	0.3917	0.0618333	-1.26053	-0.3614
Pstk		0	0	0	0	0	0	1	0	0	0	-0.534367	-0.3791	-1.2811	-0.8194	-1.46167
Psrc2	YES	0	0	0	0	1	0	0	0	0	0	-0.875133	0.936433	0.762367	-0.675333	-0.176
Psmf1	YES	0	0	0	0	0	0	0	0	0	1	-0.0092	0.499433	0.0565667	0.136867	-0.0294667
Psme3		0	0	0	0	0	1	0	0	0	0	0.2665	-0.344267	-0.600767	-0.245967	-0.1372
Psme1	YES	0	0	1	0	0	0	0	0	0	0	0.279733	0.192367	0.172133	0.2118	0.349933
Psmd5		0	0	0	0	0	0	0	1	0	0	-0.116633	-0.435033	0.077	0.5804	0.4283
Psmd14	YES	0	0	0	0	0	0	1	0	0	0	-0.678333	-0.197533	-0.204933	-0.596167	-0.757767
Psmd13	YES	0	0	1	0	0	0	0	0	1	0	0.1055	-0.196833	-0.257	-0.2258	0.157133
Psmc4	YES	0	0	1	0	0	0	0	0	0	0	0.162267	-0.199833	-0.2641	-0.2839	0.239867
Psmb8		0	0	0	0	0	0	0	1	0	0	-0.432667	-0.510733	0.1203	0.7493	0.0406333
Psma2		0	1	1	1	0	0	0	1	0	0	-0.1565	0.366533	0.284067	-0.441467	-0.189767
Psip1		0	1	0	0	0	0	0	0	0	0	-1.2027	0.253733	0.0273333	-1.41593	-0.876633
Psg29	YES	0	0	0	0	0	0	0	1	1	0	0.515733	0.760267	1.20917	0.465733	1.0771
Psen2	YES	0	0	0	1	0	0	0	0	0	0	0.521733	0.4227	1.03697	0.7541	0.784567
Psen1		0	0	0	0	0	1	0	0	0	0	0.6784	-0.1416	0.0432667	0.709933	0.1568
Psd3		0	0	0	0	0	1	0	0	0	0	-0.637933	-0.303167	-0.345333	1.1047	-1.0772
Pscdbp		0	0	0	0	0	1	0	0	0	0	0.0278333	0.105733	0.0498667	-0.223467	0.0219667
Pscd3		0	0	0	0	1	0	0	0	0	0	0.175233	-0.297	-0.262833	0.7105	0.0307333
Pscd1	YES	0	0	0	1	0	0	0	1	0	0	0.180633	0.291733	-0.0451	0.645167	-0.0201
Psca	YES	0	0	0	1	0	0	0	0	0	0	-0.0316	-0.230567	0.4133	-0.148067	-0.0973
Psarl		0	0	0	0	0	1	0	0	0	0	0.0091	-0.416667	-0.217433	-0.1339	-0.150233
Psap		0	0	1	0	0	0	0	0	0	0	0.751467	0.0069	0.744633	1.39993	0.777033
Prx		0	0	0	0	0	0	0	0	1	0	-0.416	-0.3455	-0.618033	-0.179467	-0.273267
Prss7	YES	0	0	0	0	0	0	1	0	0	0	0.0340333	0.0361	0.0258	0.0071	0.173567
Prss22	YES	0	0	0	0	0	0	0	0	1	0	-0.0171	0.0401	-0.2772	-0.064	0.165833
Prss2		0	0	0	0	1	0	0	0	0	0	0.2737	0.228033	0.163167	0.0144	0.299233
Prrx1		0	0	0	0	1	0	0	0	0	0	-0.923033	0.284533	0.2065	-0.465467	-0.650367
Prpf31		0	0	0	0	0	0	0	1	0	0	0.0842667	-0.117133	-0.3527	0.0586333	-0.0148
Prpf3		0	0	0	1	0	0	0	1	0	0	-0.510467	-0.526367	-0.427567	-1.04583	-0.662633
Prp2		0	0	0	0	1	1	0	0	0	0	0.0836667	-0.0796333	-0.2745	0.0917	-0.00173333
Proz	YES	0	0	1	1	0	0	0	0	1	0	-0.216167	-0.425467	-0.9196	-0.3563	-0.4586
Prom2	YES	0	0	1	1	0	0	0	0	1	0	-0.310533	0.0111667	-0.194667	-0.376867	-0.188267
Prom1		0	0	0	1	0	1	0	1	1	0	-1.01723	-0.896233	-0.251667	0.194367	-0.338933
Proc		0	0	1	0	0	0	0	0	0	0	0.202433	-0.0233667	-0.0424333	-0.0302333	0.0159667
Prmt8		0	0	0	1	0	0	0	0	0	0	0.0005	0.361167	-0.855067	0.4764	-1.17737
Prmt2		0	0	1	1	0	0	0	1	0	0	1.0369	0.195	-0.247233	1.3145	0.2849
Prlr		0	0	0	0	0	0	0	1	0	1	-0.0331	0.0784667	-0.2473	-0.110633	0.0038
Prlpo		1	0	0	0	0	1	0	0	0	1	0.470933	0.779367	0.993	0.2891	1.2016
Prlpc2		0	0	0	0	0	0	1	0	0	0	0.144767	0.2177	0.176533	0.0152667	0.1946
Prlpc1	YES	0	1	0	0	1	1	0	0	0	0	0.0736667	0.0881333	0.0874667	0.0930667	0.2301
Prlpa		0	0	0	0	1	0	0	0	0	0	0.0695667	0.2733	0.3098	0.0825	0.444033
Prlhr	YES	0	1	0	1	0	0	0	1	0	0	0.191067	-0.139333	-0.161033	0.105733	0.0797667
Prl		1	0	0	0	0	1	0	0	0	0	0.151567	0.1747	0.0951	0.198467	0.112133
Prkx	YES	0	1	1	1	0	0	0	1	1	0	0.0752667	0.704433	0.519733	0.171833	-0.3498
Prkrir	YES	0	0	1	0	0	0	0	0	0	0	-0.453167	0.271033	0.2728	-0.788433	-0.3919
Prkra	YES	0	0	0	0	0	0	1	0	0	0	-0.0926	0.195767	-0.348633	-0.473133	-0.7484
Prkg1	YES	0	0	0	0	1	0	1	0	0	0	-0.372967	-0.0642333	0.378533	0.897233	0.0242333
Prkdc		0	0	0	0	0	0	1	0	0	0	-0.793267	-0.140467	-0.175	-0.3687	-0.3309
Prkci		0	0	0	0	0	0	0	0	1	0	-0.390467	0.0414333	-0.0885333	-0.613667	-0.534067
Prkch	YES	0	0	0	0	0	0	0	1	1	0	-0.0962667	-0.387767	-0.803	-0.346733	-0.405033
Prkca	YES	0	0	0	1	0	0	0	0	0	0	0.0845	0.5574	1.494	0.8836	0.7812
Prkar2b	YES	0	0	0	0	0	0	1	0	0	0	-0.6919	0.574633	-0.8051	-1.03827	-1.459
Prkag1		0	0	1	0	0	1	0	1	1	0	0.121967	-0.715533	-0.7034	0.455667	0.00703333
Prkacb	YES	0	0	0	0	0	0	0	1	0	0	-0.1293	0.508533	0.313167	-0.2077	-0.3115
Prkab1		0	0	0	0	0	0	0	1	0	0	-0.5009	-0.873133	-1.2674	-0.5342	-0.263767
Prkaa1	YES	0	1	0	0	0	0	1	0	0	0	-0.5554	0.190267	0.6504	-0.116067	-0.236233
Prh1		0	0	0	0	0	1	0	0	0	0	0.0887	-0.152233	-0.399433	0.198233	-0.0597333
Prepl		0	0	1	1	0	0	0	0	1	0	-0.0736333	-0.368233	-0.4926	0.690333	-0.366
Prei4		0	1	0	0	0	0	0	0	0	0	-0.250967	1.0319	0.8415	-0.587933	-0.5981
Prdx4	YES	0	0	0	0	1	0	0	0	0	0	-0.723367	-0.827967	-0.895033	-1.55023	-0.745167
Prdm4	YES	0	0	0	1	0	0	0	0	0	0	-0.2606	-0.109	-0.421167	-0.5101	-0.483467
Prb1		0	1	0	0	1	0	0	0	0	0	0.6013	0.721233	0.7509	0.191933	0.7112
Pramel5	YES	0	0	0	0	0	1	0	0	0	0	0.756767	0.826933	1.155	0.397967	1.25853
Pramel4	YES	1	0	0	0	0	1	0	0	0	0	0.6757	0.6438	1.1218	0.7038	1.0435
Pramel3		0	0	0	0	0	1	0	0	0	0	0.164533	0.804533	1.60543	0.1536	1.89533
Ppyr1		0	0	1	1	0	0	0	1	1	0	0.0715667	0.0901333	0.206167	-0.0485667	0.0157667
Ppy		0	0	0	1	0	0	0	1	1	0	0.0943	-0.262167	0.367667	0.101567	0.1633
Pps	YES	0	0	0	0	0	1	0	0	0	0	0.668533	0.4935	0.134967	1.25497	1.07113
Ppp6c		0	0	0	0	0	0	1	0	0	0	-0.5479	0.2064	0.217267	-0.333567	-0.546533
Ppp3cc	YES	0	0	0	0	0	0	1	0	0	0	0.108233	0.163833	0.692567	0.862933	-0.0688333
Ppp3cb		1	0	0	0	0	1	0	0	0	0	-0.6574	0.535233	-0.3086	-0.921433	-0.856767
Ppp2r5a	YES	0	0	0	0	0	0	1	0	0	0	-0.00426667	0.621833	0.988133	0.619967	0.587167
Ppp2r2c	YES	0	0	0	0	0	0	0	0	1	0	0.2359	0.622167	0.0734333	1.36423	-1.9257
Ppp1r8		0	0	1	0	0	0	0	0	0	0	-0.0317333	-0.844133	-1.22133	-0.176633	-0.3866
Ppp1r1b	YES	0	0	0	0	0	0	0	0	1	0	-0.225833	-0.618267	-1.2295	1.01073	0.7258
Ppp1r1a		0	0	1	0	0	0	0	0	0	0	0.418433	0.307333	0.0358	0.983433	0.4971
Ppp1r15b		0	0	0	1	0	0	0	0	1	0	-0.113633	-0.846667	-0.400967	0.273067	-0.174833
Ppp1r14b		0	0	0	0	0	0	0	0	1	0	0.1966	-0.642567	-1.546	-1.61537	-0.3309
Ppp1r10	YES	0	0	1	1	0	0	0	0	0	0	0.4618	-0.2247	-0.492233	0.0813667	0.4016
Ppp1cc		0	0	0	0	0	0	0	1	0	0	-0.429733	-0.1926	-0.5312	-1.49083	-0.3921
Ppm2c		0	0	1	0	0	1	0	0	0	0	0.067	0.867367	1.02637	3.09207	1.3985
Ppm1h	YES	0	0	0	1	0	0	1	0	1	0	-0.0696	-0.283933	-0.0573	-0.0408333	-0.0203667
Ppm1d		0	0	0	0	0	0	1	0	0	0	-0.168133	0.484767	0.00226667	-1.00353	-0.3994
Ppil4	YES	0	0	1	1	0	0	0	0	0	0	-0.296	0.4407	0.0470333	-0.476533	-0.253533
Ppil2	YES	0	0	0	0	0	0	0	0	1	0	0.4759	-0.041	-0.628167	0.4718	0.401433
Ppic		0	0	0	0	0	1	0	0	0	0	-0.529733	0.252367	0.6305	-1.60527	-0.624433
Pphln1		0	1	0	0	0	1	0	0	0	0	-0.535933	-0.975233	-0.841033	-0.700233	-0.892433
Ppgb		0	0	0	1	0	0	0	0	1	0	0.772633	0.350233	1.22767	1.8278	0.756067
Ppargc1a		0	0	0	0	0	0	1	0	0	0	-1.30663	-0.818133	-0.890467	-0.606833	-0.916167
Pparbp		0	0	0	1	0	0	1	0	0	0	-0.111033	-0.683533	-0.806	-0.553767	-0.909567
Ppara	YES	0	0	0	0	0	0	0	0	1	0	0.279567	-0.0377333	-0.330267	0.363867	-0.4151
Ppapdc2		0	1	0	0	0	0	0	0	0	0	0.3335	0.7572	0.787767	0.945267	0.4991
Ppap2a		0	0	0	0	0	0	1	0	0	0	-0.1485	0.0121	1.0586	1.65417	0.664233
Ppan	YES	0	0	0	1	0	0	0	0	0	0	-0.730433	-1.0086	-1.96227	-1.46367	-1.3503
Pou4f2	YES	0	1	1	1	0	0	0	1	0	0	0.217067	0.367033	0.702733	0.1407	0.7645
Pou3f4		0	0	0	1	0	0	0	0	1	0	0.1083	-0.586833	-1.40433	-0.3423	0.1373
Pou3f2		0	0	0	0	0	0	0	1	1	0	-0.174833	-0.362	-0.919833	0.2975	-0.525
Pou2f2		0	0	0	1	0	0	0	1	0	0	-0.0697333	-0.143467	-0.6506	-0.1296	-0.0662
Pou2f1		0	0	0	0	1	1	0	0	0	0	-0.0697	0.259567	-0.625833	-0.0805	-0.104033
Pou2f1		0	0	1	1	0	0	0	0	0	0	-0.263533	0.4344	-0.811133	-0.3635	-0.315533
Postn	YES	0	0	0	0	0	1	0	1	0	1	0.0166667	0.3702	0.366367	0.974533	-0.133433
Porcn	YES	0	1	0	0	0	0	1	0	0	0	0.7544	0.3709	0.487133	1.14883	0.381767
Popdc3		0	0	0	0	0	1	0	0	0	0	0.193533	0.301967	0.582933	0.327533	0.4157
Pop7		0	0	1	0	0	0	0	1	0	0	-0.400833	-0.666467	-1.32347	-0.837833	-0.678767
Pop4		0	1	0	0	0	0	0	0	0	0	-0.422067	-0.209567	-0.812867	-0.408767	-0.5387
Pop1		0	1	0	0	0	1	0	0	0	0	-0.0734333	-1.11387	-1.06507	-0.351633	-0.692467
Pomt1		0	0	1	1	0	0	0	1	0	0	0.0268667	-0.949533	-1.0069	-0.0834667	-0.423333
Pols	YES	0	1	0	1	0	0	0	0	1	0	-0.0449667	-0.0811667	-0.675767	-0.756167	-0.427933
Polrmt	YES	0	0	0	0	0	0	0	0	0	1	0.13	-0.631033	-1.16097	-0.410133	-0.3855
Polr3f		0	0	0	0	0	0	0	1	0	0	-0.784233	0.203433	0.0804	-0.670833	-0.3869
Polr3e		0	0	0	0	0	0	1	0	0	0	-0.332667	-0.0302667	-0.358067	-0.694767	-0.710833
Polr2j		0	0	1	1	0	0	0	0	0	0	0.149333	0.2658	-0.317233	-0.617767	0.127433
Polr2b	YES	0	0	1	1	0	0	0	0	0	0	-0.2152	-0.272967	-0.0316333	-0.277867	-0.328033
Polm		0	0	0	0	0	0	1	0	0	0	0.235967	-0.5945	-0.848	0.4667	-0.255533
Pole	YES	0	0	1	0	0	0	0	0	0	0	-1.0124	-1.96893	-2.2767	-2.00357	-1.1377
Pold4	YES	0	0	0	0	0	0	0	1	1	0	0.726067	0.4253	0.192633	0.491633	-0.00493333
Pold2		0	0	1	0	0	0	0	0	0	0	-0.310533	-2.55227	-2.3733	-0.344433	-0.821567
Pold1	YES	0	0	1	0	0	0	0	0	0	0	-0.825467	-2.37243	-3.09763	-2.29863	-1.44963
Pola2		0	0	1	1	0	0	0	0	0	0	-0.4462	-2.13717	-2.23667	-1.36407	-0.627033
Pogk		0	1	0	0	0	0	0	0	0	0	0.1957	0.0713	-0.0196667	0.432367	-0.405667
Podn		0	0	1	1	0	0	0	0	1	0	-0.322967	-0.749667	0.8116	2.56103	0.887867
Pnrc2	YES	0	0	0	0	0	0	0	0	1	0	-0.2444	0.913933	1.1468	-0.2403	-0.0641
Pnn		0	0	1	0	0	0	1	0	0	0	-1.4851	-0.120633	-0.177633	-1.7699	-0.9775
Pnma1		0	0	0	0	0	0	0	1	1	0	-0.2142	-0.311033	-0.724067	-0.0373333	-0.384867
Pmpca	YES	0	1	0	0	0	0	1	0	0	0	-0.294067	-0.7741	-0.262667	-0.251033	-0.3121
Pmm2		0	0	0	0	0	0	0	0	1	0	0.1381	-0.203067	-0.513967	-0.231867	-0.419667
Pmf1	YES	0	0	0	1	0	0	0	0	0	0	-0.880167	-2.0146	-2.91363	-2.8091	-1.58763
Pmch		0	0	0	0	1	0	0	0	0	0	-1.22763	-1.75097	-1.57287	-2.2158	-1.19333
Plxna3		0	1	0	0	0	0	0	0	0	0	0.335033	0.226767	-0.472133	0.508933	0.211767
Plxna2	YES	0	0	0	0	0	1	0	0	0	0	-0.381367	-0.567033	-1.7199	-0.755333	-1.08143
Plxna1		0	0	0	0	1	0	0	0	0	0	0.769167	-0.8986	-1.0744	1.585	-0.185433
Plxdc1	YES	0	0	0	0	0	0	0	1	0	0	-0.0409	-0.0377	0.0874333	0.214167	-0.1035
Plscr3		0	0	0	0	0	0	0	1	0	0	-0.0862667	-0.364933	-0.452933	-0.181933	-0.433167
Pls3	YES	0	0	0	0	0	0	0	0	1	0	-1.0009	-0.1678	0.7197	0.163433	0.0608
Plpi		0	0	0	0	0	1	0	0	0	0	0.194867	0.4336	0.8691	0.392433	1.0503
Plpcd		0	0	0	0	1	1	0	0	0	0	-0.0154	0.331133	0.356633	0.2393	0.170833
Plod3	YES	0	0	0	1	0	0	0	0	0	0	0.5638	-0.797133	-0.126433	1.45757	0.150833
Plf		1	0	0	0	0	1	0	0	0	0	0.753733	1.43053	2.13647	0.661733	2.29153
Plekhf2		0	0	1	0	0	0	0	1	1	0	0.132567	0.615533	0.4089	-0.276233	-0.2562
Plekha7	YES	0	0	0	0	0	0	0	0	1	0	-0.304067	-0.857067	-0.786033	0.457167	-0.8691
Plek2	YES	0	0	0	0	0	0	0	1	0	0	-0.3131	-0.383467	-0.2956	-0.386533	-0.2657
Plcl3	YES	0	0	0	0	0	1	0	0	0	0	-0.7317	-0.638933	-0.470133	-0.120733	-0.4999
Plcl2		0	0	0	1	0	0	0	0	0	0	-0.4242	-0.190767	-0.697733	-0.916567	-0.457567
Plcb1		0	0	0	0	0	0	0	0	1	0	-0.6124	0.3965	-0.581333	0.0946667	-1.23423
Plagl1	YES	0	0	0	1	0	0	0	1	0	0	-0.904667	-0.967267	0.315067	1.55717	0.359367
Plac8		0	0	0	0	0	0	0	0	1	0	0.2497	0.240533	0.678	0.375233	0.644933
Pla2g7		0	0	0	0	0	0	0	0	0	1	1.96603	2.69207	4.00943	2.91037	3.26993
Pla2g4e		0	0	0	1	0	0	0	0	0	0	-0.245867	-0.0198667	-0.699933	-0.185733	-0.2773
Pla2g4d		0	0	0	0	0	0	0	0	1	0	0.173667	-0.0948667	0.196933	-0.0338	0.00976667
Pla2g4a	YES	1	0	0	0	0	0	0	0	0	0	0.3392	1.17887	0.683267	0.2945	-0.243967
Pkp3		0	0	0	0	0	0	0	0	1	0	0.104667	-0.1077	-0.137267	0.0127667	-0.0908
Pkp2		0	1	0	0	0	0	0	0	0	0	-0.292733	-0.446167	0.333667	1.24127	0.2951
Pkp1	YES	0	0	0	0	0	0	0	1	1	0	0.0776667	-0.184867	0.582933	0.238167	0.1706
Pknox2		0	0	0	0	0	0	1	0	0	0	0.843567	-0.263133	-0.716967	-0.00636667	-0.590267
Pknox1		0	0	0	0	0	0	0	1	0	0	-0.1343	-0.160833	-0.350633	-0.646367	-0.1573
Pkib		0	0	0	0	0	1	0	0	0	0	0.0638	0.0745333	0.101133	-0.135633	0.255267
Pkia		0	0	0	0	0	1	0	0	0	0	-0.5595	1.22437	0.0489333	-0.5566	-1.3988
Pkhd1		0	0	0	0	1	0	0	0	0	0	0.191767	0.0463333	0.132833	0.0511333	0.248433
Pkdrej		0	0	0	0	0	0	1	0	0	0	0.138333	-0.151833	0.284133	-0.109067	0.177967
Pkd2l2		0	0	1	0	0	0	0	0	0	0	-0.130833	0.0213333	-0.0375333	-0.0513333	0.0561
Pkd2	YES	0	0	0	0	0	1	0	0	0	0	-0.5914	0.9376	0.950733	-0.399433	0.0410333
Pkd1	YES	0	0	0	0	0	0	1	0	0	0	-0.415133	-0.543267	-1.1517	-0.803433	-0.101033
Pja2	YES	0	0	0	1	0	0	0	0	0	0	-0.341233	0.998833	1.1077	-0.380333	-0.4565
Pja1		0	0	0	0	0	1	0	0	0	0	0.0173333	-0.183867	-1.23367	-0.512033	-0.658733
Pitx3		0	0	0	1	0	0	0	0	1	0	0.216367	-0.0765	-0.207133	0.387433	0.1186
Pitpnm1	YES	0	0	0	0	0	0	0	1	0	0	-0.0373333	-0.439767	-1.7113	0.1885	-0.927767
Pitpnb		0	0	0	1	0	0	0	0	1	0	-0.137	-0.3244	-0.3962	0.00853333	-0.200667
Pitpna	YES	0	0	1	0	0	0	0	1	0	0	-0.0798333	0.5671	0.349933	0.1909	0.3897
Pira6		0	0	0	0	0	1	0	0	0	0	0.419867	0.174167	0.920633	0.529767	0.8104
Pira4		0	0	0	0	0	1	0	0	0	0	0.4282	0.1481	1.20327	0.611733	0.9887
Pira2		0	0	0	0	1	0	0	0	0	0	0.642	0.8982	1.51653	0.623467	1.67767
Pira1	YES	0	0	0	0	0	1	0	0	0	0	0.673933	0.845967	1.3887	0.501667	1.14947
Pir		0	0	1	0	0	1	0	0	0	0	-0.802767	-0.4886	-1.00323	-0.5845	-0.785133
Pipox	YES	0	1	0	0	0	0	0	0	0	0	-0.6221	-0.687833	-0.921933	-0.48	-0.919467
Pip5k2a	YES	1	0	1	0	0	0	0	0	0	0	-0.1528	0.335533	0.429	0.338933	-0.101067
Pim3	YES	0	1	0	0	0	0	1	0	1	0	0.4152	0.0055	-0.2807	0.8619	0.0851333
Pim1		0	0	1	0	0	0	0	0	1	0	-0.3532	-0.879267	-1.2454	-0.0354	-0.450667
Pik3r3		0	0	0	0	0	0	0	0	1	0	-0.131033	0.6825	1.103	0.199367	-0.102867
Pik3cb	YES	0	0	0	1	0	0	0	0	0	0	-0.0883667	0.1405	-0.478433	-0.235733	-0.501433
Pik3c3	YES	0	0	0	0	0	1	0	0	0	0	0.402833	-0.0653667	-0.0963	0.6808	0.199667
Pik3c2g		0	0	0	0	0	0	0	0	0	1	0.00893333	0.1589	0.1164	0.185833	0.1262
Pik3c2a		0	0	0	0	0	0	1	0	0	0	-0.922167	-0.1019	0.5026	0.3295	-0.8141
Pigw		0	0	1	0	0	0	0	1	1	0	-0.691067	-0.2874	-0.445767	-0.361867	-0.320567
Pigp	YES	0	1	0	0	0	0	1	0	0	0	-0.655267	0.887	0.426	-1.22193	-0.0998667
Pigm		0	0	0	0	1	0	0	0	0	0	-0.397767	-0.252867	-0.329333	-0.430433	-0.361667
Pigc		0	0	0	0	0	1	0	0	0	0	-0.2933	0.1653	0.2378	-0.360667	0.0687667
Pigb	YES	0	0	0	0	0	1	0	0	1	0	0.105833	0.119833	0.3299	0.738667	0.446167
Pias2		0	0	0	0	0	1	0	0	0	0	-0.638867	0.4321	0.1876	-0.6613	-0.421233
Pi4k2b	YES	0	0	0	1	0	0	1	0	1	0	-0.766067	-0.3611	-0.565867	-0.239333	-1.06537
Pi4k2a	YES	0	0	0	1	0	0	1	0	0	0	-0.1096	-0.2034	-0.3953	-0.0753333	-0.1552
Pi16	YES	0	0	0	1	0	0	0	0	1	0	0.00196667	-0.157167	-0.201633	-0.240067	0.1229
Pi15		0	0	0	0	0	1	0	0	0	0	-0.0657	0.0356333	0.2027	0.8069	0.581
Phyhipl	YES	0	0	0	1	0	0	0	0	0	0	0.218267	1.15893	1.61063	0.291867	0.824667
Phxr4	YES	0	0	0	0	0	1	0	0	0	0	-0.940533	-0.405067	-0.595067	-1.42977	-0.354
Phtf2		0	0	0	0	0	0	0	0	0	1	-1.00003	-0.0511667	-0.670467	-1.2817	-1.09913
Phldb2	YES	1	0	0	0	0	0	0	0	0	0	-0.4907	0.549267	-0.282467	-0.931267	-0.411767
Phkb	YES	0	0	0	0	0	0	1	0	0	0	-0.342	0.0992333	1.0305	0.619133	0.1723
Phgdhl1		0	1	0	0	0	0	0	0	0	0	0.554133	0.0937333	-0.0452	-0.0292	0.1045
Phf22		0	0	0	0	0	1	0	0	0	0	-0.348067	0.325167	-0.161733	-0.3667	-0.566733
Phf15		0	0	0	0	0	0	0	1	0	0	-0.3319	-0.206733	0.314667	0.769667	0.315867
Phf12	YES	0	1	0	0	0	0	0	1	0	0	0.0951333	0.225233	-0.305067	-0.5454	0.0161667
Phca	YES	0	0	0	0	0	0	1	0	0	0	-0.291933	0.423033	0.142733	-0.2955	-0.364667
Phc2	YES	0	0	0	0	0	0	0	0	1	0	0.450867	-0.127567	-0.8627	-0.5707	0.157733
Phb		0	0	0	0	0	0	0	1	0	0	0.0471	-0.448367	-0.819133	-0.454833	0.1746
Pgrmc1	YES	0	0	0	0	0	0	1	0	0	0	-0.154233	0.4613	0.281633	0.3634	-0.248667
Pgr	YES	0	0	0	0	0	1	0	0	0	0	-0.348767	0.1359	-0.308167	-0.241	0.0925
Pgk1		0	0	0	0	0	0	0	1	0	1	-0.3165	-1.16787	-0.359767	-0.0702	-1.07733
Pgea1		0	0	1	0	0	0	0	0	0	0	-0.1277	-0.4518	-1.21877	-0.4785	-0.842233
Pgcp		0	0	0	0	0	1	0	0	0	0	0.0250333	0.135533	1.18507	1.0002	-0.589367
Pgbd5	YES	0	1	1	1	0	0	0	0	0	0	0.2333	-0.186433	-1.42017	0.244133	-0.6491
Pgam2		0	0	0	1	0	0	0	0	1	0	0.394067	-0.0593333	-0.698567	0.594633	-0.0304333
Pga5		0	0	0	0	0	1	0	0	0	0	0.2337	-0.181633	0.224267	0.214167	0.19
Pfn4		0	1	0	0	0	1	0	0	0	0	0.594133	1.33547	1.23943	1.32843	1.03593
Pfn1		0	0	1	0	0	0	0	0	0	0	-0.1475	-1.12233	-1.3097	-0.5223	-0.483667
Pfdn4		0	0	0	0	0	1	0	0	0	0	-0.667633	0.101633	-0.151167	-1.0122	-0.847333
Pfc	YES	1	0	0	0	0	0	0	0	0	0	-0.564233	-0.220333	-0.818233	-0.536033	-0.479767
Pex14	YES	0	1	0	0	0	0	0	0	0	0	0.451033	0.0121	-0.620233	-0.135433	0.0456333
Pex12		0	1	0	0	0	0	0	0	0	0	-0.1632	-0.120933	-0.260267	-0.323567	-0.240467
Pet2		0	0	0	0	0	0	1	0	0	0	0.136367	0.0333333	-0.0182	-0.222067	0.175567
Perld1	YES	0	0	0	0	0	0	0	0	1	0	0.727767	-0.295867	-0.569833	0.1342	0.4448
Peli2	YES	0	1	0	0	0	0	0	0	0	0	0.882467	0.174033	0.0854333	1.31313	0.720467
Peli1	YES	0	0	0	0	0	1	0	0	0	0	-0.394833	0.897433	1.04073	-1.10923	-0.722367
Peg10		0	1	0	0	0	0	0	0	0	0	-0.544567	0.574	2.20017	0.204767	0.789633
Pef1		0	0	1	0	0	0	0	0	1	0	0.541967	-0.2315	-0.512867	0.794833	0.3949
Pdxp		0	1	0	0	0	0	0	0	0	0	0.2818	-0.240933	-1.5402	-0.800567	-0.844333
Pdrg1	YES	0	0	0	0	1	0	0	0	0	0	0.0156667	0.459133	-0.146233	0.00463333	0.160667
Pdlim7		0	0	0	0	0	0	0	1	0	0	0.541833	-0.197433	-0.0298	1.77397	1.01087
Pdlim5		0	0	0	0	0	0	1	1	0	0	-0.321133	-0.434	0.219967	0.864067	-0.222467
Pdlim5		1	0	0	0	0	1	0	0	0	0	-0.329733	-0.3558	0.473233	0.759	-0.253
Pdk4		0	0	0	1	0	0	0	0	1	0	0.2153	0.5756	0.2873	0.528933	0.146167
Pdk3		0	0	0	0	0	0	1	0	0	0	-0.1194	-0.7298	-0.582467	-0.4523	-0.850533
Pdk1		0	1	0	0	0	0	0	0	0	0	-0.4659	-0.0311	-0.7539	0.416267	-1.46777
Pdik1l		0	0	0	0	0	0	0	1	1	0	-0.8505	0.361167	0.224867	-0.7902	-0.914933
Pdha2		0	0	0	0	1	0	0	0	0	1	0.2635	0.1707	0.371433	0.143767	0.441767
Pdgfrl	YES	0	1	0	0	0	0	1	0	0	0	0.0557	0.4383	0.9041	2.03403	1.36627
Pdgfrb	YES	0	0	0	1	0	0	0	0	0	0	1.6753	1.99883	0.516233	1.91447	1.1414
Pdgfc	YES	1	0	0	0	0	1	0	0	0	1	-0.298567	-0.213367	-0.339833	0.185567	-0.379433
Pdgfb	YES	0	0	0	0	0	0	0	1	1	0	-0.1183	-0.232967	-0.3273	0.3032	-0.235833
Pde5a		0	0	0	0	0	1	0	0	0	0	-0.0559667	-0.389967	-0.390267	-0.1286	-0.258633
Pde3b	YES	0	1	0	0	1	0	1	0	0	0	-0.830233	-0.462267	-0.503467	-1.35513	-1.5748
Pde2a	YES	0	0	0	1	0	0	0	0	0	0	0.511633	-0.7257	-0.7879	-0.890067	-1.82173
Pde1b		0	1	0	0	0	0	0	0	0	0	0.9952	0.566867	-0.2702	0.4084	0.011
Pde1a		0	0	0	0	1	1	0	0	0	1	-1.1209	-0.424867	-1.16367	-1.02747	-1.06063
Pde10a	YES	0	0	0	0	0	0	1	0	0	0	-0.0597333	0.2226	-0.733867	-0.2829	-1.0049
Pddc1		0	0	1	0	0	0	0	0	0	0	1.037	0.499933	0.1442	0.275567	0.5723
Pdcd8		0	0	0	0	0	0	0	1	0	0	-0.750867	-0.674867	-0.191233	-0.327833	-0.635533
Pdcd7		0	0	0	1	0	0	0	1	0	0	0.287333	-0.0220667	-0.6094	-0.2198	-0.483667
Pdcd1lg2	YES	0	0	0	0	0	1	0	0	0	0	0.2086	0.0209667	0.179233	0.02	-0.0081
Pdcd11	YES	0	1	0	0	0	0	0	0	0	0	-0.0218667	-0.519533	-0.855433	-0.513433	-0.3444
Pcyox1		0	0	1	0	0	0	0	0	0	0	0.175533	0.121033	0.729867	0.501433	0.0188333
Pctk2	YES	0	0	0	0	0	0	1	0	0	0	-0.4205	-0.265467	-0.469067	0.0911	-0.0635667
Pcsk1n		0	0	0	1	0	0	0	1	1	0	0.1464	0.174833	-0.515967	0.1029	-0.1056
Pcsk1	YES	0	1	0	1	1	0	0	0	0	0	-0.052	0.0547667	-0.424733	-0.225467	-0.1985
Pcp2		0	0	0	0	0	1	0	0	0	0	-0.0537333	-0.0957333	-0.4901	-0.0842667	-0.141433
Pcolce2		0	0	0	0	1	1	1	0	0	0	-0.6147	-1.5881	-1.28707	-1.291	0.757967
Pcnp		0	0	0	0	0	0	0	0	0	1	-0.512567	0.410567	0.5728	-0.5471	-0.519167
Pcna		0	0	0	0	0	0	1	0	0	0	-1.50483	-2.55307	-2.6867	-1.94797	-0.668133
Pcmtd2	YES	0	0	1	0	0	0	0	1	0	0	-0.278767	1.31557	0.862467	-0.545033	-0.102767
Pclo	YES	0	1	0	0	0	0	1	0	0	0	-0.605933	0.660433	-0.414367	-0.360667	-0.846433
Pcgf5	YES	0	0	0	0	0	1	0	0	0	0	-0.21	-0.365567	-0.0451333	-0.342067	-0.339167
Pcgf4		0	1	0	0	0	0	1	0	0	0	-0.417233	1.15497	0.688067	-0.7062	-0.3036
Pcgf3	YES	0	0	1	0	0	0	0	0	0	0	-0.3386	0.0140667	-0.213733	-0.7716	-0.896533
Pcgf2	YES	0	0	0	0	0	0	0	1	0	0	0.9136	0.381833	-0.191	1.50473	0.675367
Pcdhgb1	YES	0	0	0	0	1	0	1	0	0	0	0.6943	0.1687	0.308267	0.486867	0.520033
Pcdhb7		0	0	0	0	0	1	0	0	0	0	-0.0995333	0.817967	0.8172	0.473033	-0.2164
Pcdhb3		0	0	0	0	1	0	0	0	0	0	0.226233	1.18597	0.889833	0.269867	0.167467
Pcdhb2		0	0	0	0	0	1	0	0	0	0	0.5885	0.237067	0.301033	0.681867	0.00793333
Pcdhb19	YES	0	1	0	0	0	0	0	0	0	0	-0.171233	0.4251	0.0377	0.0638333	-0.203533
Pcdhb13	YES	0	0	0	0	1	1	0	0	0	1	0.3634	0.285967	0.520833	0.932633	0.1745
Pcdhb10	YES	0	1	0	0	0	0	0	0	0	0	0.689033	0.660033	0.6331	0.519767	0.426
Pcdhb1	YES	0	1	0	0	0	0	0	1	0	0	0.118267	0.0212333	0.140567	-0.046	0.3632
Pcdhac1	YES	0	0	1	0	0	0	0	0	0	0	-0.1476	1.0144	0.686067	0.0113333	-0.637867
Pcdh8	YES	0	0	0	1	0	0	0	0	0	0	0.880667	0.941833	0.1923	1.37663	0.825467
Pcdh7		0	0	1	0	0	0	0	0	0	0	-0.9516	-0.675867	-0.190633	-0.748133	-0.9403
Pcdh21	YES	0	0	1	1	0	0	0	1	0	0	-0.2921	0.215767	-0.508667	-0.3821	-0.2725
Pcdh18		0	0	0	0	0	1	0	0	0	0	-1.01013	-0.452933	-0.979333	-1.36413	-1.4401
Pcdh15	YES	0	0	0	0	0	1	0	0	0	0	0.286233	0.836367	0.2518	0.154733	0.166567
Pcdh1	YES	0	0	0	0	0	0	0	1	0	0	0.3128	-0.330867	-0.977733	0.7402	-0.6817
Pcbp1	YES	0	0	0	0	0	0	1	0	0	0	0.1795	-0.381867	-0.819233	-0.727833	-0.416067
Pcbd2	YES	0	0	0	0	0	0	1	0	0	0	0.0197333	0.0791667	0.472033	-0.190367	0.286933
Pbx4	YES	0	0	0	1	0	0	0	1	1	0	-0.2378	-0.1874	-0.6148	-0.1583	-0.3567
Pax7	YES	0	0	0	1	0	0	0	0	0	0	0.0521	-0.0208333	0.168467	-0.0888333	0.107667
Pax5	YES	0	0	0	0	0	1	0	0	0	1	0.2918	-0.0729	0.1573	0.0422	0.164667
Pax1	YES	0	0	0	0	0	0	0	1	0	0	0.00486667	0.0929667	-0.100233	-0.0250667	0.1124
Pawr		0	0	1	1	1	1	0	1	1	0	-0.542367	-0.3719	1.84923	2.4604	1.6121
Parvg		0	0	0	0	0	0	0	1	0	0	0.310933	-0.116333	0.475867	0.417733	0.553033
Parvb		0	0	0	0	0	0	0	0	1	0	0.9362	0.446067	2.26333	1.9256	1.8699
Parp9		0	0	0	0	0	0	0	0	1	0	-0.522167	-0.448233	0.447367	0.821333	0.162667
Parp2	YES	0	0	1	0	0	0	0	0	0	0	-0.8598	-0.4089	-0.8665	-1.00367	-0.973633
Parp16		0	0	0	1	0	0	0	1	1	0	-0.1262	-0.432367	-0.779467	-0.0327	-0.8014
Parn	YES	0	1	1	0	0	0	0	0	0	0	0.151733	-0.0061	-0.0861	0.5133	-0.142533
Park2	YES	0	0	0	0	0	0	1	0	0	0	1.00773	1.0363	0.523633	1.66567	0.960433
Pard6b	YES	0	0	0	1	0	0	0	0	0	0	3.33333e-05	-0.252033	0.0671333	2.45787	0.000533333
Pard6a	YES	0	0	1	0	0	0	0	0	0	0	0.476167	-0.167267	-0.875	0.2922	0.0541333
Pard3	YES	1	1	0	0	0	1	0	0	0	0	-0.1	-0.1115	-0.204167	-0.232933	-0.787733
Pard3	YES	0	1	0	0	0	0	0	0	0	0	0.7769	-0.0801333	-0.278067	0.579733	-0.133733
Paqr9		0	0	0	1	0	0	0	1	1	0	0.0935667	0.190933	-0.115833	-0.4492	-0.0601667
Paqr4		0	0	1	1	0	0	0	0	0	0	0.741333	-0.4895	0.8027	1.59773	1.54663
Paqr3	YES	0	0	1	1	0	0	0	0	0	0	-0.118433	0.3263	-0.4119	-0.0829333	-0.164467
Papss1	YES	0	0	0	0	0	0	0	1	0	0	0.4138	-0.0056	-0.0858	0.264633	-0.1505
Papolb		1	0	0	0	0	0	0	0	0	0	-0.1986	-0.0855667	-0.0861	-0.469933	0.159833
Pap		0	0	0	0	0	0	0	0	1	0	0.2446	0.2745	0.173933	0.255167	0.374867
Paox		0	0	0	0	1	0	0	0	0	0	0.311867	-0.2508	0.0702667	0.524533	0.155967
Panx3	YES	0	0	0	0	0	1	0	0	0	0	0.158833	0.1714	0.2893	-0.0707667	0.242933
Panx1	YES	0	0	0	0	0	0	1	0	0	0	0.433633	0.0446333	0.125	-0.820367	-0.493567
Pank1		0	0	0	0	0	1	0	0	0	0	0.204933	0.907367	0.169967	-0.178	-0.814767
Palmd	YES	0	0	0	0	0	0	0	0	1	0	-0.3174	-0.002	-0.2081	-0.246633	-0.0642667
Palm2		0	1	0	0	0	0	0	0	0	0	-0.4433	0.2489	-0.1663	0.378933	-0.0094
Pak1ip1		0	0	0	1	0	0	0	1	1	0	-0.419	-0.446333	-0.2451	-0.0885667	-0.0735333
Pak1		0	0	1	0	0	0	0	1	0	0	-0.000866667	0.291067	-0.382267	1.45157	-0.471867
Paip1		0	0	1	1	0	0	0	1	0	0	-0.310467	-0.07	-0.885667	-0.224767	-0.566267
Pafah1b1	YES	0	0	0	0	0	0	1	0	0	0	-1.0153	-0.104567	0.4452	0.0686333	-0.532267
Padi3		0	0	0	1	0	0	0	0	0	0	0.0928	-0.186933	-0.0990333	-0.0871667	-0.2077
Padi2		0	0	0	1	0	0	0	1	1	0	1.58027	1.68417	2.93023	4.18113	4.72003
Pacsin1	YES	0	0	0	0	0	0	0	0	1	0	-0.368967	-0.137267	-1.13487	-0.4029	-0.6853
Pabpc2		0	0	0	0	0	0	1	0	0	0	0.0786333	0.0420333	-0.0891	-0.154333	-0.0101333
Pabpc1		0	0	1	0	0	0	0	0	1	0	-0.0546667	0.134733	-0.483333	-0.8435	-0.9059
P4hb		0	0	1	0	0	0	0	0	0	0	0.304033	-0.333333	0.130067	-0.0124	-0.344233
P2ry13	YES	0	1	0	0	0	0	0	0	0	0	-0.196367	0.123167	0.155467	-0.0127667	0.1085
P2ry10		1	1	0	0	0	1	0	0	0	1	0.0934667	0.0202667	0.0934333	-0.134133	0.0168
P140	YES	0	0	0	1	0	0	0	0	1	0	0.600867	0.0273333	-0.465667	1.8468	0.1315
p	YES	0	0	1	0	0	0	0	0	0	0	0.00813333	0.2065	-0.154967	0.5231	0.180033
Oxnad1		0	0	1	0	0	1	0	0	0	0	-0.485967	-0.5891	-0.726833	-0.150833	-0.6096
Oxgr1		0	0	0	0	0	1	0	0	0	0	0.0923667	-0.0303	-0.0428667	-0.0716667	0.0848667
Oxct2a	YES	0	0	0	1	0	0	0	1	1	0	0.00196667	-0.242233	-0.1269	0.0506667	-0.0499667
Oxct1	YES	0	0	0	1	0	0	0	1	1	0	-0.637133	0.0508333	0.724767	-0.443067	-1.0165
Oxa1l	YES	0	0	1	0	0	0	0	0	0	0	0.439933	0.2464	-0.0639667	-0.532	-0.0340667
Ovol2	YES	0	0	1	0	1	1	0	0	0	0	0.0987	-0.0378333	-0.0304	0.0402667	0.1551
Otx1	YES	0	0	0	1	0	0	0	1	0	0	0.207233	-0.4456	-0.778367	-0.277867	-0.0389
Otud7	YES	0	1	0	0	0	1	0	0	0	0	-0.115867	-0.200067	-0.767533	-0.2648	-0.3408
Otud6b		0	0	0	0	0	0	1	0	0	0	-0.731667	0.0139	0.329733	-0.2946	-1.05353
Otud5	YES	0	0	0	1	0	0	0	0	0	0	0.556967	-0.0831	-0.6044	0.135633	0.113967
Ott		0	0	0	0	1	1	0	0	0	1	0.785667	1.18987	2.02113	0.6291	2.042
Otor	YES	0	1	0	0	0	1	0	0	0	0	0.052	0.576033	0.364367	0.0299	0.448267
Otof	YES	0	0	0	0	0	0	0	1	0	0	-0.0066	-0.229533	-0.300933	0.0224667	-0.0355667
Ostn	YES	0	0	0	0	1	0	0	0	0	0	0.0623333	0.163967	0.159333	-0.0362	0.0197667
Osmr	YES	0	0	0	0	0	1	0	0	0	0	0.2574	0.751033	3.6284	4.3303	2.97547
Osm		0	0	0	0	0	0	0	1	0	0	0.2526	0.0151	0.2811	0.246967	0.3317
Osbpl5	YES	0	0	0	1	0	0	0	0	1	0	0.777767	0.901167	1.52727	2.14467	2.34797
Ormdl3		0	0	0	0	0	0	0	1	0	0	0.5302	0.324633	0.446467	0.915967	0.4339
ORF61		0	0	1	0	0	0	0	0	0	0	0.673767	-0.376767	-0.458433	1.0245	0.3191
ORF34	YES	0	0	1	0	0	0	0	0	1	0	-0.698067	-0.315933	-0.577233	-0.2083	-0.4312
ORF21		0	0	1	1	0	0	0	0	1	0	-0.171667	-0.229133	-0.8996	-0.397033	-0.5946
Orc6l		0	0	0	0	0	0	1	0	0	0	-0.673767	-0.410767	-0.8805	-0.3975	-0.4331
Orc4l		0	0	0	0	0	0	1	0	1	0	-0.958733	0.185033	0.1841	-0.561933	-0.832367
Orc2l		0	1	0	0	0	0	0	0	0	0	-0.786567	-0.4767	-0.0615333	-0.736433	-1.0896
Orc1l		0	0	0	0	0	1	0	0	0	0	-1.31143	-1.99057	-2.02133	-1.95247	-1.32757
Optc		0	0	0	0	0	0	0	1	1	0	0.2064	-0.436133	-0.2124	0.0188333	-0.322233
Oprm1	YES	0	0	1	1	0	0	0	0	0	0	0.0414667	-0.0334	-0.155567	-0.1242	0.2132
Oprl1	YES	0	0	1	0	0	1	0	0	0	1	0.212033	0.666267	-0.221533	0.484	-0.747667
Opa1		0	1	1	0	1	0	0	0	0	0	-0.3612	0.0772667	0.171567	0.533967	-0.799467
Oosp1		0	0	0	0	0	0	0	0	0	1	0.2269	0.4104	0.382933	0.1018	0.405
Oog2		1	0	0	0	0	1	0	0	0	1	0.662767	0.7105	1.14267	0.314033	1.2233
Oog1		1	0	0	0	0	1	0	0	0	0	0.5121	0.556667	0.996733	0.7624	0.8026
Omd	YES	0	0	0	0	0	0	1	0	0	0	-0.8225	-0.526467	0.6057	1.08233	0.4033
Olig2	YES	0	0	0	0	0	0	0	1	0	0	0.335133	-0.393267	-1.03017	-1.74913	-0.678133
Olfr998		0	0	0	0	0	0	1	0	0	0	0.2918	0.6841	0.709667	0.449067	0.969767
Olfr995	YES	0	0	0	0	0	0	1	0	0	0	0.227333	0.241633	0.171133	0.0290333	0.426567
Olfr993		0	0	0	0	0	1	0	0	0	0	0.209967	0.450233	0.542267	0.1041	0.675533
Olfr988		0	0	0	0	1	0	0	0	0	0	0.5104	1.0039	1.19633	0.348467	1.4596
Olfr987		0	0	0	0	0	1	0	0	0	0	0.481567	0.787167	0.768633	0.372033	1.20123
Olfr986		0	0	0	0	0	1	0	0	0	0	0.140967	0.166867	0.123633	0.105667	0.304133
Olfr984	YES	0	0	0	0	0	0	1	0	0	0	0.2397	0.1465	0.294133	0.0837	0.467733
Olfr981		0	0	0	0	0	1	0	0	0	0	0.5513	0.840667	1.02677	0.671533	1.3059
Olfr976		0	1	0	0	0	0	0	0	0	0	0.320267	0.3004	0.561167	0.314567	0.770867
Olfr975		0	0	0	0	0	1	0	0	0	1	0.0796	0.0703667	0.1253	-0.0704	0.0526667
Olfr974		0	0	0	0	0	1	0	0	0	0	0.256267	0.342833	0.386	0.107933	0.479533
Olfr973		0	0	0	0	0	0	0	0	0	1	0.4978	0.5865	1.07207	0.292533	1.30067
Olfr972		0	0	0	0	0	0	0	0	0	1	0.3798	0.410667	0.810833	0.2816	0.809533
Olfr968		0	1	0	0	0	0	0	0	0	0	0.437767	0.498867	0.774767	0.374567	1.0154
Olfr965		0	0	0	0	0	0	1	0	0	0	0.298633	0.558567	0.677033	0.1474	0.8723
Olfr961		0	1	0	0	0	1	0	0	0	0	0.322867	0.416733	0.633467	0.458167	1.0748
Olfr960		1	1	0	0	1	1	0	0	0	0	0.430767	0.555167	0.951033	0.545433	0.9023
Olfr96		1	0	0	0	0	1	0	0	0	0	0.2954	0.532933	0.640833	0.3857	1.19843
Olfr959		0	0	0	0	1	0	0	0	0	0	0.3701	0.581767	0.6625	0.321633	0.9031
Olfr958		0	0	0	0	0	1	0	0	0	1	0.729867	1.0271	1.5117	0.6569	1.80367
Olfr955		0	0	0	0	0	0	1	0	0	0	0.249833	0.490933	0.475667	0.156433	0.916867
Olfr954		0	0	0	0	0	1	0	0	0	0	0.341967	0.2558	0.620967	0.293	0.7326
Olfr952		0	1	0	0	0	0	0	0	0	0	0.269333	0.268	0.3309	0.192767	0.6691
Olfr951		0	1	0	0	0	1	0	0	0	1	0.302933	0.476533	0.663133	0.243567	0.646067
Olfr945		0	0	0	0	0	0	1	0	0	0	0.0457667	0.185867	0.3624	0.118267	0.3512
Olfr944		0	0	0	0	0	1	0	0	0	0	0.5941	0.963367	1.25243	0.408233	1.63847
Olfr94		0	0	0	0	1	0	0	0	0	0	0.0566333	-0.0245667	-0.348067	-0.00216667	0.107633
Olfr937		0	1	0	0	0	0	0	0	0	0	0.0969667	0.2749	-0.038	0.153967	0.374
Olfr933		0	0	0	0	1	0	0	0	0	0	0.174633	0.461367	0.4078	0.3142	0.7919
Olfr923		0	0	0	0	1	1	0	0	0	0	0.493067	0.645233	0.7425	0.354067	0.639433
Olfr921		0	0	0	0	0	1	0	0	0	0	0.209167	0.4136	0.215167	0.217633	0.270333
Olfr919		0	0	0	0	1	1	0	0	0	0	0.521867	0.703967	0.886133	0.3136	0.918767
Olfr918		0	0	0	0	1	0	0	0	0	1	0.134467	0.350633	0.587067	0.2099	0.768767
Olfr917		0	0	0	0	1	1	0	0	0	0	0.243233	0.5336	0.584633	0.320967	0.925933
Olfr915		1	0	0	0	1	1	0	0	0	0	0.348233	0.569167	0.762767	0.289867	0.791133
Olfr914		0	1	0	0	0	0	0	0	0	0	0.3449	0.7462	0.886433	0.4775	1.27253
Olfr912		0	1	0	0	1	1	0	0	0	0	0.355333	0.422933	0.668133	0.284567	0.870033
Olfr910		1	1	0	0	1	1	1	0	0	1	0.343033	0.914067	1.01823	0.358	1.36643
Olfr91	YES	0	0	0	0	0	0	1	0	0	0	0.0652333	0.00806667	-0.00596667	0.0315333	0.201967
Olfr907		0	0	0	0	0	1	0	0	0	0	0.4922	0.7069	1.26823	0.172167	1.24967
Olfr901	YES	0	1	0	0	0	1	1	0	0	0	0.2049	0.0784	-0.0306333	-0.0491	0.188967
Olfr899	YES	0	1	0	0	0	0	0	0	0	0	0.3294	0.5176	0.480333	0.3595	0.733167
Olfr898		0	0	0	0	0	1	0	0	0	0	0.830067	0.996	1.93157	0.8952	1.98013
Olfr893		1	0	0	0	0	0	0	0	0	0	0.453867	0.8872	1.05847	0.618767	1.65107
Olfr888		0	0	0	0	1	0	0	0	0	0	0.349133	0.2374	0.3894	0.126867	0.1835
Olfr887		0	0	0	0	1	1	0	0	0	0	0.234	0.525733	0.513	0.259033	0.746267
Olfr884		0	0	0	0	1	1	0	0	0	0	0.4377	0.4059	0.360733	0.197767	0.581867
Olfr881		0	1	0	0	1	1	0	0	0	0	0.3985	0.534733	0.3057	0.244567	0.564767
Olfr878		1	0	0	0	0	0	0	0	0	0	0.376433	0.8228	1.03857	0.4118	1.1047
Olfr877		0	1	0	0	0	1	0	0	0	0	0.320567	0.649933	1.00833	0.301333	0.874533
Olfr873		0	1	0	0	0	0	0	0	0	0	0.353367	0.638733	0.8312	0.387033	1.0221
Olfr871		0	1	0	0	0	0	0	0	0	0	0.438933	0.766333	0.995967	0.160867	1.23983
Olfr870		0	0	0	0	0	1	0	0	0	0	0.5753	0.7817	0.819467	0.316	1.1465
Olfr868		0	0	0	0	0	0	1	0	0	0	0.295733	0.345467	0.5528	0.234033	0.7604
Olfr867		0	1	0	0	0	1	0	0	0	0	0.3313	0.2712	0.363867	0.0910333	0.329267
Olfr862	YES	0	1	0	0	0	1	0	0	0	0	0.383267	0.615767	1.08377	0.423667	1.18887
Olfr860	YES	0	0	0	0	0	1	0	0	0	0	0.1593	0.5421	0.546633	0.212033	0.742133
Olfr859		0	0	0	0	0	1	0	0	0	0	0.575633	0.996667	1.2353	0.610733	1.37637
Olfr857		0	0	0	0	0	1	0	0	0	0	0.4548	0.7911	1.0869	0.3834	1.20717
Olfr855		0	0	0	0	0	0	1	0	0	0	0.150667	0.411367	0.4903	0.177267	0.5359
Olfr854		0	0	0	0	0	0	0	0	0	1	0.2124	0.233333	0.376733	0.0794667	0.578667
Olfr853		0	0	0	0	0	0	1	0	0	0	0.210033	0.504233	0.248667	0.0275667	0.548033
Olfr850		0	0	0	0	0	0	1	0	0	0	0.349567	0.914633	0.992733	0.4385	1.4488
Olfr849		0	0	0	0	0	1	0	0	0	0	0.367533	0.839633	1.0358	0.4649	1.56697
Olfr847		0	1	0	0	0	1	0	0	0	0	0.230967	0.425067	0.5499	0.0771	0.5792
Olfr846		0	1	0	0	1	1	1	0	0	0	0.315367	0.720567	0.647833	0.262633	0.971367
Olfr836		0	0	0	0	0	1	0	0	0	0	0.195967	0.634	0.559767	0.143467	0.570967
Olfr834		0	0	0	0	0	0	1	0	0	0	0.2393	0.530833	0.872	0.2394	0.973867
Olfr829		0	0	0	0	0	1	0	0	0	0	0.407133	0.511667	0.601667	0.2323	0.6117
Olfr828		0	0	0	0	0	1	0	0	0	0	0.316133	0.593933	0.507167	0.306533	0.5751
Olfr824	YES	0	1	0	0	0	1	1	0	0	0	0.0827667	0.353467	0.6951	0.175867	0.7062
Olfr823		1	0	0	0	1	1	1	0	0	1	0.1429	0.4109	0.5674	0.0995667	0.7921
Olfr821		0	0	0	0	0	0	1	0	0	0	0.192467	0.566167	0.7808	0.427133	1.00477
Olfr818		0	0	0	0	0	0	1	0	0	0	0.355	0.661133	1.10173	0.268333	1.17927
Olfr816		0	0	0	0	0	1	0	0	0	0	0.1629	0.218833	0.934333	0.276333	0.5132
Olfr815		0	1	0	0	1	1	0	0	0	1	0.280967	0.904	1.2689	0.335533	1.4366
Olfr814		0	0	0	0	0	1	1	0	0	0	0.354133	1.0146	1.48503	0.259367	1.7351
Olfr813	YES	0	0	0	0	0	1	0	0	0	0	0.2612	0.212833	0.258533	0.176533	0.505733
Olfr811	YES	1	0	0	0	0	1	0	0	0	0	0.0703	0.365233	0.502633	0.205033	0.626433
Olfr804	YES	0	0	0	0	1	1	0	0	0	0	0.4389	0.671067	1.1362	0.561667	1.26517
Olfr802		0	0	0	0	1	1	0	0	0	0	0.1416	0.384133	0.821567	0.326433	0.856
Olfr800		0	1	0	0	0	1	0	0	0	0	0.416833	1.0784	1.2012	0.457267	1.6191
Olfr796		0	0	0	0	0	1	0	0	0	1	0.255633	0.4126	0.534833	0.4073	0.834467
Olfr794		0	1	0	0	0	1	0	0	0	0	0.119967	0.273533	0.353767	0.1828	0.503067
Olfr792		0	0	0	0	1	1	0	0	0	0	0.290833	0.498467	0.5493	0.410567	0.819833
Olfr784		0	0	0	0	1	1	0	0	0	0	0.636667	0.843467	1.54313	0.527467	1.82933
Olfr782		0	0	0	0	1	1	0	0	0	1	0.718267	1.13193	1.91397	0.781167	1.96367
Olfr781		0	0	0	0	0	0	1	0	0	0	0.236133	0.496233	0.548967	0.192533	0.5603
Olfr780		0	1	0	0	0	1	0	0	0	0	0.280467	0.608333	0.816	0.378033	0.987833
Olfr776		0	0	0	0	0	1	1	0	0	0	0.3265	0.955533	1.55723	0.361467	1.6186
Olfr774		0	0	0	0	0	1	0	0	0	0	0.440667	0.733967	1.27557	0.347767	1.2953
Olfr773-ps1		0	1	0	0	0	0	0	0	0	0	0.838933	1.29753	2.01697	0.823667	2.18317
Olfr771		0	0	0	0	0	1	0	0	0	0	0.2728	0.5669	0.574033	0.1215	0.8108
Olfr767		0	0	0	0	1	1	0	0	0	0	0.348667	0.682833	1.0082	0.623267	1.56573
Olfr761		0	0	0	0	0	1	0	0	0	0	1.2848	1.90353	2.50483	0.849333	2.74683
Olfr750		0	0	0	0	1	0	0	0	0	1	-0.094	-0.00803333	-0.100933	-0.0614	0.130633
Olfr749	YES	0	0	0	0	1	0	0	0	0	1	0.398833	0.715133	0.9268	0.235467	1.0648
Olfr748	YES	0	1	0	0	1	0	1	0	0	0	0.4223	0.5308	0.805167	0.234267	0.869033
Olfr747	YES	1	0	0	0	1	0	0	0	0	0	0.3619	0.676667	0.7514	0.190433	0.998533
Olfr746		0	1	0	0	0	0	0	0	0	0	0.583067	0.9821	1.2861	0.586933	1.36883
Olfr745		0	0	0	0	0	0	1	0	0	0	0.5098	0.776667	1.0839	0.3848	1.0308
Olfr744		0	0	0	0	0	1	0	0	0	0	0.640067	0.86	1.23367	0.486233	1.14343
Olfr742		0	0	0	0	0	1	0	0	0	0	0.764367	0.977633	1.34223	0.709767	2.08793
Olfr741		1	0	0	0	1	1	0	0	0	0	0.5995	0.4736	1.20897	0.4056	1.6609
Olfr740		0	0	0	0	0	1	0	0	0	0	0.3105	0.613767	0.916667	0.431933	0.8327
Olfr739		0	0	0	0	0	1	0	0	0	0	0.600033	0.7942	1.37547	0.501367	1.1792
Olfr738		0	0	0	0	0	0	1	0	0	0	0.4144	0.5556	0.7459	0.410867	0.851333
Olfr736		1	0	0	0	1	0	1	0	0	0	0.308867	0.407133	0.560867	0.257767	0.780867
Olfr735		0	0	0	0	0	0	1	0	0	0	0.589767	0.661033	0.896167	0.711033	1.33437
Olfr734		0	1	0	0	0	1	0	0	0	0	0.397833	0.4418	0.6803	0.256567	0.7467
Olfr733		0	1	0	0	0	1	0	0	0	0	0.6737	1.10227	1.54473	0.7849	2.08887
Olfr730		0	0	0	0	0	1	1	0	0	1	0.3057	0.836733	1.1283	0.413033	1.3517
Olfr729		0	0	0	0	0	0	1	0	0	0	0.131767	0.257033	0.548767	-0.0618333	0.517567
Olfr728		0	0	0	0	0	0	1	0	0	0	0.280567	0.9298	1.10703	0.352833	1.54793
Olfr727		0	1	0	0	0	0	0	0	0	0	0.0557	0.252933	0.436367	0.1058	0.279533
Olfr726		0	0	0	0	0	1	0	0	0	0	0.408133	0.4896	0.8708	0.5107	1.39347
Olfr722		0	0	0	0	0	0	1	0	0	0	0.585333	0.712833	0.984933	0.422333	1.56257
Olfr720		0	1	0	0	0	1	0	0	0	0	0.1666	0.3716	0.3647	0.254867	0.305433
Olfr715		0	1	0	0	0	0	0	0	0	0	0.6395	1.026	1.2191	0.710967	1.3544
Olfr713		0	1	0	0	0	0	0	0	0	0	0.3169	0.307733	0.336333	0.2375	0.335933
Olfr71		0	0	0	1	0	0	0	1	1	0	0.174167	-0.1774	0.131367	0.0151667	0.105667
Olfr708		0	0	0	0	0	1	1	0	0	0	0.317433	0.5044	0.6107	0.261833	0.8258
Olfr707		0	0	0	0	0	0	1	0	0	0	0.295933	0.384767	0.542567	0.2621	0.570567
Olfr706		0	0	0	0	0	0	1	0	0	0	0.5432	0.654167	0.898867	0.477933	0.964933
Olfr702		0	1	0	0	0	0	0	0	0	0	0.212467	0.3133	0.240133	0.249167	0.4914
Olfr700		0	1	0	0	0	0	0	0	0	0	0.5097	0.581733	0.909633	0.470067	1.42653
Olfr691		0	0	0	0	1	1	0	0	0	0	0.0459	0.302433	0.2095	0.190333	0.2141
Olfr688		0	0	0	0	0	0	1	0	0	0	0.230267	0.643833	0.8046	0.394367	1.1136
Olfr686		0	0	0	0	0	1	0	0	0	0	0.196167	0.173967	0.2425	0.155633	0.5774
Olfr685		0	0	0	0	0	0	1	0	0	0	0.616267	0.441933	0.7931	0.479933	0.807333
Olfr684		0	0	0	0	0	1	0	0	0	0	0.333967	0.239167	0.287667	0.3754	0.382733
Olfr681		0	0	0	0	0	1	0	0	0	0	0.635067	1.08353	1.75017	0.791833	2.1722
Olfr68	YES	0	0	0	0	1	0	0	0	0	0	0.604967	0.662433	0.774067	0.3696	1.03447
Olfr679		0	0	0	0	1	1	0	0	0	0	0.729833	1.1009	1.55587	0.912833	2.07357
Olfr678		0	1	0	0	1	1	0	0	0	0	0.277767	0.2583	0.3933	0.279867	0.586233
Olfr677		0	0	0	0	0	1	0	0	0	0	0.4089	0.780967	0.667667	0.493967	1.0674
Olfr671		0	0	0	0	1	0	0	0	0	0	0.438733	0.619267	0.605067	0.456767	1.03403
Olfr67	YES	0	0	0	0	0	0	1	0	0	0	0.197033	0.167533	0.243533	0.0984333	0.308367
Olfr665		0	0	0	0	0	1	0	0	0	0	0.413267	0.722233	0.6775	0.4364	1.09243
Olfr66		0	1	0	0	0	0	0	0	0	0	0.303633	0.377133	0.371267	0.1362	0.402533
Olfr649	YES	0	0	0	0	0	1	0	0	0	0	0.6164	0.848367	1.26383	0.598733	1.6122
Olfr644		0	1	0	0	1	1	0	0	0	1	0.408667	0.9681	0.7971	0.3187	1.52337
Olfr642		0	0	0	0	1	1	0	0	0	0	0.280567	0.439567	0.415933	0.2237	0.5494
Olfr640		0	0	0	0	0	1	0	0	0	0	0.4076	0.682367	0.614867	0.326	0.878367
Olfr639		0	1	0	0	0	0	0	0	0	0	0.439833	0.685767	0.8408	0.306633	0.970333
Olfr632		0	0	0	0	1	1	0	0	0	1	0.316767	0.314933	0.4433	0.517133	0.5625
Olfr63		0	0	0	0	0	1	0	0	0	0	0.5038	0.356367	0.867133	0.3266	0.990633
Olfr629		0	0	0	0	0	0	1	0	0	0	0.3944	0.4627	0.634833	0.4885	0.644567
Olfr623	YES	0	0	0	0	1	0	0	0	0	0	0.752667	1.44163	1.9746	0.7358	2.38367
Olfr619	YES	0	0	0	0	0	1	0	0	0	0	0.616133	0.8084	0.9775	0.302367	1.27187
Olfr61	YES	1	1	0	0	0	0	0	0	0	0	0.401967	0.6185	0.9629	0.508233	0.831933
Olfr608	YES	0	0	0	0	0	0	1	0	0	0	0.277167	0.374133	0.221833	0.210367	0.759733
Olfr606	YES	0	0	0	0	1	0	0	0	0	1	0.385333	0.5861	0.924967	0.610367	1.24563
Olfr604	YES	0	1	0	0	1	0	0	0	0	0	0.4006	0.573967	0.778167	0.261667	0.820267
Olfr600	YES	0	1	0	0	0	0	1	0	0	0	0.232433	0.352133	0.330333	0.113667	0.635867
Olfr6		0	1	0	0	1	1	0	0	0	1	0.430233	0.655933	0.7101	0.43	1.21843
Olfr592		0	0	0	0	1	1	0	0	0	0	0.5572	0.659633	0.977633	0.518333	1.17013
Olfr589		0	0	0	0	0	1	0	0	0	0	0.248567	0.369433	0.231067	0.2865	0.430933
Olfr585		0	0	0	0	0	1	0	0	0	0	0.3974	0.677233	0.861333	0.381133	1.0291
Olfr582		0	0	0	0	0	0	1	0	0	0	0.876267	0.999367	1.7349	0.731233	1.71907
Olfr58		0	0	0	0	1	1	0	0	0	0	0.472633	0.976533	1.12857	0.4283	1.16503
Olfr576		0	0	0	0	0	0	1	0	0	0	0.333867	0.610967	0.945067	0.4268	0.8752
Olfr574		0	1	0	0	0	1	0	0	0	0	0.316167	0.351767	0.685733	0.3014	0.987833
Olfr572		0	0	0	0	0	0	1	0	0	0	0.235633	-0.033	0.0737	0.206167	0.230733
Olfr571		0	0	0	0	0	0	1	0	0	0	0.360067	0.361867	0.385867	0.296267	0.481767
Olfr57		1	0	0	0	0	1	0	0	0	0	0.293433	0.468633	0.7694	0.257167	0.7251
Olfr569		0	0	0	0	1	1	0	0	0	0	0.6784	0.765033	1.20923	0.723	1.68563
Olfr568		0	1	0	0	0	0	0	0	0	0	0.402533	0.672333	0.871533	0.427067	1.24357
Olfr561	YES	0	0	0	0	1	0	0	0	0	0	0.0650333	0.186	0.325467	0.0208	0.2935
Olfr56	YES	0	0	0	0	0	1	0	0	0	0	0.167167	0.0595	0.191333	0.194167	0.162633
Olfr559		0	0	0	0	0	0	1	0	0	0	0.3322	0.589967	0.6272	0.404967	0.977067
Olfr558		1	0	0	0	0	1	0	1	0	0	0.698167	0.4513	0.6548	0.369267	0.4775
Olfr545		0	0	0	0	0	0	1	0	0	0	0.2716	0.2348	0.189533	0.2003	0.256533
Olfr541	YES	1	0	0	0	0	1	0	0	0	0	0.656333	0.2993	0.993133	0.545467	1.0625
Olfr538		0	0	0	0	0	1	0	0	0	0	0.822667	0.708	1.6437	0.906467	1.33497
Olfr531		0	0	0	0	0	1	0	0	0	0	0.434867	0.304967	0.601733	0.237	0.474733
Olfr527		0	0	0	0	0	1	0	0	0	0	0.387933	0.3944	0.907933	0.584733	0.863733
Olfr520		0	0	0	0	0	1	0	0	0	0	0.110067	0.1663	0.555433	0.151333	0.1937
Olfr52		0	0	0	0	0	1	0	0	0	0	0.441767	0.5235	0.704633	0.4784	0.936933
Olfr519		0	0	0	0	0	1	0	0	0	0	0.434867	0.529667	0.8445	0.388767	0.819933
Olfr518		0	0	0	0	0	0	1	0	0	0	0.3102	0.378267	0.418033	0.319733	0.555733
Olfr517		0	0	0	0	1	1	0	0	0	0	0.449067	0.408467	0.5565	0.231733	0.815133
Olfr516	YES	0	0	0	0	0	1	0	0	0	0	0.637233	0.5747	1.0382	0.397333	1.18097
Olfr514	YES	0	0	0	0	0	0	0	0	1	0	0.487267	0.622533	1.1067	0.522567	1.46543
Olfr510		0	0	0	0	1	0	0	0	0	0	0.481867	0.562033	0.791267	0.4645	1.12333
Olfr509		0	0	0	0	0	1	0	0	0	0	0.298833	0.466833	0.638367	0.286333	0.574067
Olfr508		0	0	0	0	0	0	1	0	0	0	0.369367	0.267667	0.3733	0.0739667	0.5908
Olfr504		0	0	0	0	1	1	0	0	0	0	0.300967	0.612333	0.5756	0.316367	1.01023
Olfr503		0	0	0	0	0	0	1	0	0	0	0.428667	0.520733	0.4765	0.176	0.643067
Olfr498		0	0	0	0	0	1	0	0	0	0	0.885633	0.869767	1.4602	0.656033	1.63173
Olfr497		0	0	0	0	0	0	1	0	0	0	0.767567	1.04247	1.53543	0.5036	1.403
Olfr494		0	0	0	0	0	1	0	0	0	0	0.448333	0.8195	0.899167	0.5581	0.949267
Olfr49	YES	0	0	0	0	0	0	1	0	0	0	0.3391	0.3813	0.606167	0.1837	0.7246
Olfr480		0	0	0	0	0	0	1	0	0	0	0.3482	0.638233	0.871067	0.3316	0.959133
Olfr479	YES	0	1	0	0	0	1	0	0	0	0	0.273067	0.6038	0.666967	0.4632	0.868967
Olfr476	YES	0	0	0	0	0	0	1	0	0	0	0.387567	0.678333	0.823933	0.456767	0.9624
Olfr474		0	0	0	0	1	0	0	0	0	0	0.5556	0.644433	0.883833	0.2798	1.09277
Olfr472	YES	0	1	0	0	1	1	0	0	0	0	0.5787	0.550167	0.792767	0.462667	0.9462
Olfr469		0	0	0	0	0	0	1	0	0	0	0.743033	1.06597	1.467	0.738233	1.6607
Olfr467		0	0	0	0	1	0	0	0	0	0	0.1763	0.486567	0.606433	0.308533	0.585633
Olfr462	YES	0	0	0	0	0	0	0	1	0	0	0.281367	0.0753667	0.630533	0.0400667	0.536867
Olfr461		0	0	0	0	0	1	0	0	0	0	0.2385	0.317033	0.0628333	0.2238	0.255367
Olfr460		0	1	0	0	0	1	0	0	0	0	0.304467	0.5105	0.4788	0.0911667	0.5183
Olfr46		0	0	0	0	0	1	0	0	0	0	0.6628	0.3194	1.28383	0.454667	1.05943
Olfr459		0	0	0	0	0	1	0	0	0	0	0.429033	0.5105	0.5264	0.2784	0.755033
Olfr457		0	1	0	0	0	0	0	0	0	0	0.0479	0.156167	-0.1124	0.0802667	0.1667
Olfr449		0	0	0	0	0	1	0	0	0	0	0.4237	0.596333	0.8475	0.661367	1.05017
Olfr447		0	0	0	0	1	0	0	0	0	0	0.143433	0.1816	0.272267	0.0861333	0.532067
Olfr438		0	0	0	0	0	0	1	0	0	0	0.590633	0.3095	0.947133	0.327	1.1846
Olfr435		1	0	0	0	0	0	0	0	0	0	0.3408	0.352267	0.554933	0.1129	0.6644
Olfr432		0	0	0	0	0	1	0	0	0	1	0.233267	0.0896333	0.239333	0.1821	0.5001
Olfr430		0	0	0	0	0	1	1	0	0	1	0.0975	0.166533	0.253333	0.0801	0.559767
Olfr43		0	0	0	0	1	1	0	0	0	1	0.493967	0.556067	1.01247	0.463933	1.04773
[truncated: 3,592 more rows]

## Sheet: Solen OL genes
x	Oligo?	ID	Category	RefSeq	Gene	OldRE1?	NewRE1?	RE1	notes…	Description	NSC REST	NOP REST	RG REST	CN REST	GABA REST	GLUT REST	MSN REST	NG2 REST	O4 REST	O1 REST	MBP REST	AS REST	REST	NSC COREST	NOP COREST	RG COREST	CN COREST	GABA COREST	GLUT COREST	MSN COREST	NG2 COREST	O4 COREST	O1 COREST	MBP COREST	AS COREST	CR1	NOP	RG	CN	GABA	GLUT	MSN	NG2	O4	O1	MBP	AS	NOP	RG
	4	7837	IGF	NM_010517	Igfbp4				dorsal	insulin-like growth factor binding protein 4	0	0	0	0	0	0	0	0	0	1	1	0	2	0	0	0	0	0	0	0	0	0	1	1	0	2	-0.807267	-0.743167	-2.26403	-1.90207	-2.6768	-2.78737	-1.95257	-2.67773	-2.7206	-3.2134	-3.027	neg	neg
x	4	14843	transcription factor	NM_009234	Sox11		Sox11	YES		SRY-box 11	0	0	0	0	0	0	0	0	0	1	1	0	2	0	0	0	0	0	0	0	0	0	1	1	0	2	-0.176833	-0.939633	0.871433	-1.4489	-0.394567	0.319333	-0.8806	0.991433	-0.740867	-2.01267	-0.406767	-	neg
x	4	14848	transcription factor	NM_011447	Sox8		Sox8	YES	SoxE gene	SRY-box containing gene 8	0	0	0	0	0	0	0	0	0	1	1	0	2	0	0	0	0	0	0	0	0	0	1	1	0	2	-0.5362	0.2915	-0.5897	-0.771833	-1.12207	-0.2383	1.4488	0.328633	-1.16407	-0.736633	-0.360133	neg	-
	3	4283	FGF	NM_008003	Fgf15		Fgf15	YES		fibroblast growth factor 15	0	0	0	0	0	0	0	0	0	1	1	0	2	0	0	0	0	0	0	0	0	0	0	1	0	1	-0.597	-1.31287	-1.48797	-1.36883	-1.43453	-0.771133	-0.84	-1.2488	-1.782	-1.3642	-1.77153	neg	neg
x	3	8061	Notch	NM_013822	Jag1					jagged 1	0	0	0	1	0	1	1	0	0	1	1	0	5	0	0	0	0	1	0	0	0	0	0	1	0	2	0.0611667	-1.32673	-0.336533	-1.02327	-1.42683	-1.289	-0.7004	-0.0544667	-0.599567	-2.03847	-1.39283	-	neg
	3	15569	T cell	x	Tcf7					transcription factor 7 T-cell specific	0	0	0	0	0	0	0	0	0	0	1	0	1	0	0	0	0	0	0	0	0	0	1	1	0	2	1.10927	-0.456367	-0.279167	-1.749	-1.58893	-1.20013	-0.883167	-1.5741	-1.89243	-1.08883	-1.3369	pos	-
x	3	15572	transcription factor	NM_153154	Tcfap2d					transcription factor AP-2 delta	0	0	0	0	0	0	0	0	1	0	0	0	1	0	0	0	0	0	1	0	1	0	1	0	0	3	-0.313433	0.102767	-0.379133	0.227067	0.09	0.307067	-0.236267	-0.0786	-0.769433	-0.370067	-0.370733	-	-
	3	15580	transcription factor	NM_011548	Tcfe2a		Tcfe2a	YES		Transcription factor E2-alpha (Immunoglobulin enhancer-binding factor E12/E47) (Transcription factor 3) (TCF-3) (Transcription factor A1).	0	0	0	0	0	0	0	0	0	0	1	0	1	1	0	0	0	0	0	0	0	0	1	1	0	3	0.846967	-0.1121	-0.1085	-2.6403	-0.7499	-0.8949	-0.0069	-0.877067	-1.66403	-1.10247	-0.326667	pos	-
	3	15807		NM_027212	Thrap6					TRAP/Mediator complex component TRAP25	0	0	0	0	0	0	0	0	0	0	1	0	1	0	0	0	1	0	0	0	0	1	0	1	0	3	0.0247	-0.186733	0.0717	-1.35753	-0.999767	-1.24967	-0.6081	-0.00126667	-0.529433	-1.34867	-0.669133	-	-
	2	3037	cell cycle	NM_009871	Cdk5r1		Cdk5r1	YES		cyclin-dependent kinase 5 regulatory subunit	0	0	0	0	0	0	0	0	0	0	1	0	1	0	0	0	0	0	0	0	0	0	0	1	0	1	-0.6158	0.0005	0.941467	0.2333	0.896467	1.8405	0.3484	1.3766	0.0107667	-0.3968	0.001	neg	-
	2	3047	cell cycle	NM_007671	Cdkn2c					cyclin-dependent kinase inhibitor 2C (p18	0	0	0	0	0	0	0	0	0	1	0	0	1	1	0	0	0	0	0	0	0	0	0	1	0	2	1.17707	-0.884867	0.201033	-2.52987	-2.33983	-1.7241	-0.675933	-1.72267	-1.82307	-2.1686	-0.694767	pos	neg
	2	4299	FGF	NM_020013	Fgf21					fibroblast growth factor 21	0	0	0	0	0	0	0	0	0	0	0	0	0	0	0	0	0	0	0	0	0	0	1	1	0	2	0.190767	-0.110267	-0.346833	-0.118433	0.00866667	-0.115067	0.0038	-0.161167	-0.234933	-0.1652	-0.191733	-	-
	2	4267	FGF	NM_026218	Fgfr1op2					FGFR1 oncogene partner 2	1	0	0	0	0	0	0	0	0	1	1	0	3	1	0	1	0	0	0	0	0	0	0	0	0	2	0.381533	-1.33527	0.2307	-0.789367	-0.8015	-1.02917	-0.609067	0.7268	0.418667	-0.917367	-0.675733	-	neg
x	2	4295	FGF	NM_008011	Fgfr4					fibroblast growth factor receptor 4	0	0	0	0	0	0	0	0	0	0	1	0	1	0	0	0	0	0	0	0	0	0	0	1	0	1	0.221933	0.1405	-0.182033	0.0815333	-3.33333e-05	0.0032	-0.0732333	-0.313833	-0.3722	0.0884333	-0.1771	-	-
x	2	7781		NM_031166	Id4					inhibitor of DNA binding 4	0	0	0	0	0	0	0	0	0	0	1	0	1	1	0	0	0	0	0	0	1	0	0	0	0	2	-0.660167	-0.2569	1.19093	0.383467	1.6922	1.62887	0.696333	1.95307	1.09043	1.65723	2.73057	neg	-
x	2	7842	IGF	NM_010513	Igf1r		Igf1r	YES		insulin-like growth factor I receptor	0	0	0	0	1	0	0	0	0	0	1	0	2	0	0	0	0	0	0	0	0	1	0	0	0	1	-2.38437	-0.470733	-1.7784	-0.3653	-0.258833	0.1101	0.312367	0.586567	0.303267	-0.593733	0.0357667	neg	-
	2	7831	IGF	NM_023670	Igf2bp3		Igf2bp3	YES		insulin-like growth factor 2 binding protein 3	0	0	0	0	0	0	0	0	1	0	0	0	1	1	0	0	0	0	0	0	0	1	0	0	0	2	0.529233	-1.2767	-0.4372	-3.6766	-2.13847	-1.9165	-0.651367	-0.2822	-0.487267	-1.8138	-2.07727	pos	neg
	2	7838	IGF	NM_010518	Igfbp5		Igfbp5	YES		insulin-like growth factor binding protein 5	0	0	0	0	0	0	0	0	0	0	0	0	0	1	0	0	0	0	0	0	0	0	1	1	0	3	-2.95953	0.0235667	-1.63087	0.2607	2.61463	3.09583	0.310067	0.0848	2.63657	4.4772	1.38627	neg	-
	2	5356	transcription factor	NM_144955	Nkx6-1		Nkx6-1	YES		homeodomain transcription factor Nkx6.1	0	0	0	0	0	0	0	0	0	0	1	0	1	0	0	0	0	0	0	0	0	0	1	0	0	1	0.0215	0.195967	-0.1689	1.3488	0.1547	0.0265	0.0382667	-0.104567	-0.2384	0.1504	0.155233	-	-
	2	12370	PDGF	NM_026840	Pdgfrl		Pdgfrl	YES		platelet-derived growth factor receptor-like	0	0	0	0	0	0	0	0	1	0	0	0	1	0	0	0	0	0	0	0	0	1	0	0	0	1	-0.3631	-0.0883667	-0.437533	-0.153967	0.808733	-0.0109	0.0557	0.4383	0.9041	2.03403	1.36627	-	-
x	2	14846	transcription factor	NM_011438	Sox12					SRY-box containing gene 12	0	0	0	0	0	0	0	0	0	1	0	0	1	0	1	0	0	0	0	0	0	1	0	0	0	2	0.0911	-0.643033	0.101167	-0.481067	-0.3425	0.793967	0.3599	0.133467	-0.4986	-0.2865	-0.0905667	-	neg
x	2	1046	transcription factor	NM_011443	Sox2				Sry related HMG box transcription factor, "maintains stemness"	Adult retina cDNA RIKEN full-length enriched library clone:A930101E03 product:SRY-box containing gene 2 full insert sequence. (Fragment).	0	0	0	0	0	0	0	0	0	1	0	0	1	0	0	0	0	0	0	0	0	0	0	1	0	1	-0.629867	-1.02737	-0.577533	-1.90517	-0.0327667	-0.301333	0.3772	0.264833	0.391667	0.0629333	0.407867	neg	neg
x	2	14841	transcription factor	NM_009238	Sox4					SRY (sex determining region Y)-box 4	0	0	0	1	0	0	0	0	0	1	0	0	2	1	0	0	0	0	0	0	0	0	1	0	0	2	-0.170233	-0.327633	0.309333	-0.6245	0.384033	0.429433	0.821533	0.972667	0.180267	-0.0731	0.6644	-	-
	2	15565	transcription factor	NM_011545	Tcf21		Tcf21	YES		transcription factor 21	0	0	0	0	0	0	0	0	0	1	0	0	1	0	0	0	0	0	0	0	1	0	0	0	0	1	0.00963333	0.344933	-0.0850333	0.500967	0.1795	-0.0632333	0.2209	-0.0228667	0.0622667	0.0123	-0.0677333	-	-
	2	1043	receptor other	NM_198107	Thrap5		Thrap5	YES		Adult retina cDNA RIKEN full-length enriched library clone:A930033B11 product:thyroid hormone receptor associated protein 5 full insert sequence.	0	0	0	0	0	0	0	0	1	0	0	0	1	1	0	0	0	0	0	0	0	0	1	0	0	2	1.00157	0.2405	0.632967	-1.9492	-0.609833	0.4208	0.583233	-0.451167	-1.16033	0.261667	0.100667	pos	-
	1	760		NM_011789	Apc2		Apc2	YES		adenomatosis polyposis coli 2	0	0	0	0	0	0	0	0	0	0	0	0	0	0	0	0	0	0	0	0	0	0	1	0	0	1	0.475967	-0.909233	0.668333	-0.9861	-0.662467	0.665867	0.393967	-0.310733	-1.24933	-0.0682667	-0.438133	-	neg
x	1	1894	BMP	NM_009758	Bmpr1a					bone morphogenetic protein receptor type 1A	0	0	0	0	0	0	0	0	0	0	0	0	0	0	0	0	0	0	0	0	1	0	0	0	0	1	0.0293333	-1.84273	-0.0691	-3.24077	-0.7401	-0.969067	-0.748867	0.512733	1.11957	-0.0982333	0.191267	-	neg
x	1	1896	BMP	NM_007561	Bmpr2		Bmpr2	YES		bone morphogenic protein receptor type II	0	0	0	0	0	0	0	0	0	1	0	0	1	0	0	0	0	0	0	0	0	0	0	0	0	0	0.231567	-2.36033	0.0746333	-2.42597	-1.5915	-0.478867	-0.9055	-0.300967	-0.601967	0.0538	-0.629367	-	neg
	1	3038	cell cycle	NM_009872	Cdk5r2		Cdk5r2	YES		cyclin-dependent kinase 5 regulatory subunit 2	0	0	0	0	0	1	1	0	0	1	0	0	3	0	0	0	0	0	0	0	0	0	0	0	0	0	0.258633	-0.1291	0.0283333	0.0108	-0.2112	0.3327	0.0764667	-0.233967	-1.02403	0.083	-0.424	-	-
	1	2390	cell cycle	NM_145990	Cdk5rap2	NM_145990	Cdk5rap2	YES		CDK5 regulatory subunit associated protein 2	0	0	0	0	0	0	0	0	0	0	0	0	0	1	0	0	0	0	0	0	1	0	0	0	1	3	0.5546	-0.74	-0.0856667	-2.1251	-1.0365	-1.1543	-0.319233	-0.721833	-0.2254	0.187833	0.2727	pos	neg
	1	2388	cell cycle	NM_144536	Cdkal1	NM_144536	Cdkal1	YES		CDK5 regulatory subunit associated protein	0	0	0	0	0	0	0	0	1	0	0	0	1	0	0	0	1	1	0	1	0	0	0	0	0	3	-0.371933	-0.907133	-0.819	-2.2733	-1.29937	-0.363567	0.1309	-0.531433	-0.410733	-0.159133	-0.711233	-	neg
	1	3049	cell cycle	NM_183294	Cdkl1					cyclin-dependent kinase-like 1 (CDC2-related	0	0	0	0	0	0	0	0	0	0	0	0	0	1	0	0	0	0	0	0	1	0	0	0	0	2	0.0372	0.204067	-0.0792667	0.244733	0.139433	-0.0319	0.0219	-0.00206667	-0.124433	-0.0563	0.100067	-	-
	1	3045	cell cycle	NM_009877	Cdkn2a		Cdkn2a	YES	p16INK4a	cyclin-dependent kinase inhibitor 2A	0	0	0	0	0	0	0	0	0	0	0	0	0	0	0	0	0	0	0	0	0	1	0	0	0	1	0.486333	0.0473667	-0.0177	0.261767	-0.0224	-0.267167	-0.0814	-0.0657	-0.236067	-0.106367	0.00243333	-	-
	1	4279	FGF	NM_008002	Fgf10					fibroblast growth factor 10	0	0	0	0	0	0	0	0	0	0	0	0	0	0	0	0	0	0	0	0	1	0	0	0	0	1	0.1904	0.123333	0.278167	0.394067	0.239633	0.0761	0.237633	0.132233	0.0845333	-0.0253667	0.1639	-	-
	1	4264	FGF	NM_010198	Fgf11		Fgf11	YES		Fgf11 protein.	0	0	0	0	0	0	0	0	0	0	0	0	0	0	0	0	0	0	0	0	0	0	1	0	0	1	-3.05307	-1.29053	-2.74073	-0.1754	-0.8187	1.03713	0.0664667	0.0340667	-1.25547	-0.261567	-1.3972	neg	neg
	1	4265	FGF	NM_010199	Fgf12	NM_010199		YES		Fgf12	1	0	0	0	0	0	0	0	0	0	0	0	1	1	0	1	0	0	0	0	1	0	0	0	0	3	0.337033	-1.3389	1.1561	0.253833	-0.545367	1.22203	-0.734067	1.53747	0.8132	0.0335333	-0.251767	-	neg
	1	4293	FGF	NM_008009	Fgfbp1		Fgfbp1	YES		fibroblast growth factor binding protein 1	0	0	0	0	0	0	0	0	0	0	0	0	0	0	0	0	0	0	0	0	1	0	0	0	0	1	-0.238133	0.428667	-0.188533	0.773	0.5443	0.0272333	0.154833	0.0942333	0.387667	0.0457333	0.1302	-	-
x	1	1693	FGF	NM_010206	Fgfr1		Fgfr1	YES		Basic fibroblast growth factor receptor 1 precursor (EC 2.7.1.112) (FGFR-1) (bFGF-R) (MFR).	0	0	0	0	0	0	0	0	0	1	0	0	1	0	0	0	0	0	0	0	0	0	0	0	0	0	0.3962	-0.580267	-0.1486	-2.4211	-0.344933	-0.434233	-0.0788333	-0.7823	-0.144167	0.9947	-0.0867	-	neg
	1	4268	FGF	NM_201230	Fgfr1op					Fgfr1op protein.	0	0	0	0	0	0	0	0	1	0	0	0	1	0	0	0	0	0	0	0	0	0	0	0	0	0	0.307767	-1.8826	-0.113867	-2.4431	-1.6203	-1.10487	-1.07903	-0.3847	-0.6207	-1.2828	-1.3872	-	neg
x	1	5065	Notch	NM_008236	Hes2		Hes2	YES		hairy and enhancer of split 2	0	0	0	0	0	0	0	0	0	0	1	0	1	0	0	0	0	0	0	0	0	0	0	0	0	0	-0.3258	0.5446	-0.4487	1.2087	0.452233	0.0898333	0.0830333	-0.1769	0.2213	0.0194333	0.1502	-	pos
	1	7830	IGF	NM_009951	Igf2bp1		Igf2bp1	YES		insulin-like growth factor 2 binding protein 1	0	0	0	0	0	0	0	0	0	0	1	0	1	1	0	0	0	0	0	0	0	0	0	0	0	1	0.2657	-0.198867	-0.890933	-0.566033	-1.5725	-2.10853	-1.00617	-1.47407	-2.53437	-2.61097	-1.96047	-	-
	1	7834	IGF	NM_008341	Igfbp1					insulin-like growth factor binding protein 1	0	0	0	0	0	0	0	0	0	0	0	0	0	0	0	0	0	0	0	0	0	0	1	0	0	1	-0.0385	0.319567	-0.0725333	1.20903	0.195267	0.264833	0.167833	-0.0534667	0.0943	0.188133	0.167433	-	-
	1	7836	IGF	NM_008343	Igfbp3					insulin-like growth factor binding protein 3	0	0	0	0	0	0	0	0	1	0	0	0	1	1	0	0	0	0	0	1	0	0	0	0	0	2	1.23317	-0.6199	-0.172767	-4.01773	-2.2111	-2.5195	-1.65617	-2.92483	-0.789933	-0.317833	-1.24317	pos	neg
	1	308	growth factor other	NM_008048	Igfbp7	NM_008048	Igfbp7	YES		2 days neonate sympathetic ganglion cDNA RIKEN full-length enriched library clone:7120442H03 product:insulin-like growth factor binding protein 7 full insert sequence.	0	0	0	0	0	0	0	0	0	0	0	0	0	0	0	0	0	0	0	0	1	0	0	0	1	2	-0.540633	0.553933	-0.148667	0.819333	1.51063	0.184633	0.240267	0.498433	1.82363	2.66663	2.0867	neg	pos
	1	7841	IGF	NM_018741	Igfbpl1		Igfbpl1	YES		insulin-like growth factor binding protein-like	0	0	0	0	0	1	0	0	0	0	0	0	1	0	0	0	1	0	0	1	0	1	0	0	0	3	0.559933	-0.3138	0.578567	-0.480133	0.163433	0.408333	-0.346433	0.273533	-0.2126	0.683867	0.0890333	pos	-
x	1	9257	transcription factor	NM_001025251	Mbp	NM_001025251		YES		myelin basic protein isoform 1	0	0	0	0	0	0	0	0	0	1	0	0	1	0	0	0	0	0	0	0	0	0	0	0	0	0	-1.40087	1.24447	4.1035	1.1519	4.43973	4.74187	0.442867	1.18907	4.82203	5.16327	2.5276	neg	pos
x	1	9255	transcription factor	NM_008665	Myt1	NM_008665	Myt1	YES		myelin transcription factor 1	1	0	1	0	0	0	0	0	0	0	1	0	3	0	0	0	0	0	0	0	0	0	0	0	0	0	0.984867	-1.06837	1.1317	-1.58847	0.308933	0.221133	0.801867	0.902567	0.457633	-0.438033	0.7866	pos	neg
	1	11168	transcription factor	NM_008699	Nkx2-3					NK2 transcription factor related locus 3	0	0	0	0	0	0	0	0	0	0	0	0	0	0	0	0	0	0	0	0	0	0	1	0	0	1	0.118467	0.731733	-0.225433	2.85077	0.9334	-0.216067	0.0182667	0.0602667	-0.1777	-0.1447	0.247433	-	pos
	1	967	transcription factor	NM_023504	Nkx2-4					Adult male testis cDNA RIKEN full-length enriched library clone:1700001P03 product:similar to HOMEOBOX TRANSCRIPTION FACTOR.	0	0	0	0	0	0	0	0	1	0	0	0	1	0	0	0	0	0	0	0	0	0	0	0	0	0	0.410667	-0.220967	0.289867	1.01323	0.129967	0.1719	-0.2753	-0.0088	-0.5051	0.0446333	0.0828	-	-
x	1	11784	transcription factor	NM_016967	Olig2		Olig2	YES		oligodendrocyte transcription factor 2	0	1	0	0	0	0	0	0	0	0	0	0	1	0	0	0	0	0	0	0	0	0	1	0	0	1	1.7037	-0.516967	0.8769	-3.24307	-1.3328	-1.6393	0.335133	-0.393267	-1.03017	-1.74913	-0.678133	pos	neg
	1	11938		NM_008780	Pax1	NM_008780		YES		paired box gene 1	0	0	0	0	0	0	0	0	0	0	0	0	0	0	0	0	0	0	0	0	0	0	1	0	0	1	0.0584667	0.286167	-0.1855	0.711633	0.3153	0.0649	0.00486667	0.0929667	-0.100233	-0.0250667	0.1124	-	-
x	1	10628		NM_008782	Pax5	NM_008782	Pax5	YES		n/a	0	0	0	0	0	0	0	0	0	0	0	0	0	0	0	0	0	0	0	0	1	0	0	0	1	2	-0.185033	0.3593	-0.394467	0.941933	0.550667	0.1584	0.2918	-0.0729	0.1573	0.0422	0.164667	-	-
	1	11942		NM_011039	Pax7		Pax7	YES		paired box gene 7	0	0	0	0	0	0	0	0	0	0	1	0	1	0	0	0	0	0	0	0	0	0	0	0	0	0	-0.0758667	0.2015	-0.340567	0.517733	0.207467	0.1451	0.0521	-0.0208333	0.168467	-0.0888333	0.107667	-	-
	1	1772	receptor other	NM_008809	Pdgfrb		Pdgfrb	YES		Beta platelet-derived growth factor receptor precursor (EC 2.7.1.112) (PDGF-R-beta).	0	0	0	0	0	0	0	0	0	0	1	0	1	0	0	0	0	0	0	0	0	0	0	0	0	0	-0.0755	-0.156233	2.33507	0.287033	1.84053	2.57837	1.6753	1.99883	0.516233	1.91447	1.1414	-	-
	1	12333		NM_028477	Plpcd					placental prolactin-like protein C delta	0	0	0	0	0	0	0	0	0	0	0	1	1	0	0	0	0	0	1	0	1	0	0	0	0	2	-0.0284667	0.3722	0.225867	1.23367	0.2179	0.0175	-0.0154	0.331133	0.356633	0.2393	0.170833	-	-
	1	12717		NM_025896	Plpi					prolactin-like protein I	0	0	0	0	0	0	0	0	0	0	0	0	0	0	0	0	0	0	0	0	1	0	0	0	0	1	0.1184	0.7606	0.637667	3.177	0.802767	0.0144667	0.194867	0.4336	0.8691	0.392433	1.0503	-	pos
x	1	15589	transcription factor	NM_009237	Sox3					Transcription factor SOX-3.	0	0	0	0	0	0	0	0	0	0	1	0	1	0	0	0	0	0	0	0	0	0	0	0	0	0	0.3909	-0.718	0.1479	-1.86323	-1.1569	-0.929533	0.401533	-0.756633	-1.44027	-0.763167	-0.9386	-	neg
x	1	14847	transcription factor	NM_173384	Sox30					SRY-box containing gene 30	0	0	0	1	0	0	0	0	0	0	0	0	1	1	0	0	0	0	0	0	1	0	0	0	0	2	-0.145467	0.3168	-0.0152	0.5733	0.177533	0.0252	0.111033	0.0130333	0.0173333	0.0617667	0.3223	-	-
	1	15561	transcription factor	NM_011544	Tcf12		Tcf12	YES		transcription factor 12	0	0	0	0	0	0	0	0	1	0	0	0	1	0	0	0	0	0	0	0	0	0	0	0	0	0	0.674533	-1.67747	0.0242	-3.9388	-1.0183	-0.441567	-0.0253333	-0.256967	0.0853667	-0.152433	-0.6106	pos	neg
	1	15563	transcription factor	NM_009330	Tcf2					transcription factor 2	0	0	0	0	0	0	0	0	0	0	0	0	0	0	0	0	0	0	0	0	0	0	1	0	0	1	-0.426233	1.1281	-0.270333	2.19073	0.8446	0.2623	0.3699	0.1826	0.467267	0.260933	0.388767	-	pos
x	1	15568	transcription factor	NM_013685	Tcf4		Tcf4	YES		Transcription factor 4 (Immunoglobulin transcription factor 2) (ITF-2) (MITF-2) (SL3-3 enhancer factor 2) (SEF-2) (Class A helix-loop-helix transcription factor ME2).	0	0	0	0	0	0	0	0	0	0	0	0	0	0	0	0	0	0	0	0	1	0	0	0	0	1	0.4466	-1.23983	0.769433	-1.58727	-0.524833	-0.00433333	-0.486667	0.7864	0.235567	-0.795233	-0.2714	-	neg
	1	15423	receptor other	NM_172424	Thrap2		Thrap2	YES		thyroid hormone receptor associated protein 2	0	0	0	0	0	0	0	0	0	0	0	0	0	0	0	0	0	0	0	0	0	0	1	0	0	1	0.323833	-1.44107	0.526133	-1.9208	-0.811533	0.9318	0.213733	-0.337967	-0.831633	0.726533	0.117667	-	neg
	1	15424	receptor other	NM_146153	Thrap3					thyroid hormone receptor associated protein 3	0	0	0	0	0	0	0	0	0	0	0	0	0	0	0	0	0	0	0	0	0	0	0	1	0	1	1.21567	-0.722867	0.882	-1.69283	-0.332833	0.167333	0.1999	-0.817333	-0.572267	0.0900333	-0.0593333	pos	neg
x	0	759		NM_007462	Apc		Apc	YES		adenomatosis polyposis coli	0	0	0	0	0	0	0	0	0	0	0	0	0	0	0	0	0	1	1	0	0	0	0	0	0	2	1.5147	-2.85113	1.23907	-2.95367	-1.67263	0.1518	-1.27883	-0.712833	-0.617233	-0.4823	-0.991767	pos	neg
	0	14162		NM_011318	Apcs					serum amyloid P-component	0	0	0	0	0	0	0	0	0	0	0	0	0	0	0	0	0	0	0	0	0	0	0	0	0	0	-0.6532	1.71887	-0.2668	2.9111	1.6737	0.0954	0.554133	0.648767	0.8769	0.448167	0.9833	neg	pos
	0	1884	BMP	NM_009755	Bmp1		Bmp1	YES		bone morphogenetic protein 1	0	0	0	0	0	0	1	0	0	0	0	0	1	0	0	0	0	0	0	0	0	0	0	0	0	0	0.125133	0.6133	-0.168167	-3.2813	0.576933	0.415567	0.828333	-0.573367	0.6695	1.61197	0.408533	-	pos
	0	9353	BMP	NM_009756	Bmp10					n/a	0	0	0	0	0	0	0	0	0	0	0	0	0	0	0	0	0	0	0	0	0	0	0	0	0	0	-0.3409	1.01667	-0.3113	2.26483	0.680933	0.0282	0.417233	0.217933	0.515833	0.309667	0.572867	-	pos
	0	1885	BMP	NM_009757	Bmp15					bone morphogenetic protein 15	0	0	0	0	0	1	0	0	0	0	0	0	1	0	0	0	0	0	0	0	0	0	0	0	0	0	0.194233	0.180733	0.1375	0.389633	0.0821333	0.0293333	0.0782667	0.1137	0.199633	0.0299	0.376	-	-
	0	1886	BMP	NM_007553	Bmp2					bone morphogenetic protein 2	0	0	0	1	0	0	0	0	0	0	0	0	1	0	0	0	0	0	1	0	0	0	0	0	0	1	0.0791667	0.243033	0.0029	0.980033	0.383033	0.0218333	-0.2165	0.0765333	0.302267	0.314633	0.422133	-	-
	0	1843	BMP	NM_080708	Bmp2k		Bmp2k	YES		BMP2 inducible kinase	0	0	0	0	0	0	0	0	0	0	0	0	0	0	0	0	0	0	0	0	0	0	0	0	0	0	0.7375	-0.6789	0.551033	-0.3681	-0.313933	-0.0567	-0.259467	-0.276667	-0.1722	0.670267	0.5435	pos	neg
	0	1887	BMP	NM_173404	Bmp3		Bmp3	YES		bone morphogenetic protein 3	0	0	0	0	0	0	0	0	0	0	0	0	0	0	0	0	0	0	0	0	0	0	0	0	0	0	-0.0959667	-0.0658667	-0.0123	0.917733	-0.0639333	0.164367	0.0648333	-0.0311	-0.373167	0.0989	0.00126667	-	-
	0	1888	BMP	NM_007554	Bmp4					Bone morphogenetic protein 4 precursor (BMP-4) (BMP-2B).	0	0	0	0	0	0	0	0	0	0	0	0	0	0	0	0	0	0	0	0	0	0	0	0	0	0	-2.35627	-0.213933	-1.65403	0.943633	-0.2178	0.9092	0.227633	0.915733	-0.208767	-0.1639	-0.202433	neg	-
	0	1890	BMP	NM_007556	Bmp6		Bmp6	YES		bone morphogenetic protein 6	0	0	0	0	0	0	0	0	0	0	0	0	0	0	0	0	0	0	0	0	0	0	0	0	0	0	-0.374233	0.535	0.915733	2.06	2.01267	1.47447	0.747967	0.799133	1.00113	4.44813	1.87707	-	pos
	0	1891	BMP	NM_007557	Bmp7		Bmp7	YES		bone morphogenetic protein 7	0	0	0	0	0	0	0	0	0	0	0	0	0	0	0	0	0	0	0	0	0	0	0	0	0	0	-0.584633	-1.19037	-2.19403	-2.63147	-2.38517	-2.47333	-0.4314	-1.7247	-1.92537	-2.01377	-2.96023	neg	neg
	0	1892	BMP	NM_007558	Bmp8a		Bmp8a	YES		Bone morphogenetic protein 8A precursor (BMP-8A) (Osteogenic protein 2) (OP-2).	0	0	0	0	0	0	0	0	0	0	0	0	0	0	0	0	0	0	0	0	0	0	0	0	0	0	-0.0950667	0.0334667	-0.420233	0.158167	-0.205667	-0.236633	-0.00656667	-0.1498	-0.195433	-0.272933	-0.242733	-	-
	0	1893	BMP	NM_007559	Bmp8b					bone morphogenetic protein 8b	0	0	0	0	0	0	0	0	0	0	0	0	0	0	0	0	0	0	0	0	0	0	0	0	0	0	-0.0976333	0.0328	-0.0675333	0.250133	0.146933	0.00496667	-0.0267333	-0.0506333	0.0005	-0.0977333	-0.1143	-	-
	0	2931		NM_028472	Bmper		Bmper	YES		crossveinless 2	0	0	0	1	0	0	0	0	0	0	0	0	1	0	0	0	0	1	0	0	0	0	0	0	0	1	0.0380667	-0.175567	0.0895667	-1.67203	-0.219633	0.0505333	0.302367	0.529	1.2256	-0.0844667	-0.875233	-	-
x	0	1895	BMP	NM_007560	Bmpr1b		Bmpr1b	YES		bone morphogenetic protein receptor type 1B	0	0	0	0	0	0	0	0	0	0	0	0	0	0	0	0	0	0	0	0	0	0	0	0	0	0	-0.251067	-1.62433	0.341133	-1.93913	0.0512667	-0.5133	-0.2622	1.41227	1.65913	-0.350167	0.422433	-	neg
	0	10345		NM_194444	Cdk10		Cdk10	YES		n/a	0	0	0	0	0	0	0	0	0	0	0	0	0	0	0	0	0	0	0	0	0	0	0	0	0	0	0.9283	0.623733	0.875833	-0.6544	-0.0571	0.252033	0.150967	-0.499867	-1.0294	0.358233	0.130733	pos	pos
	0	2387	cell cycle	NM_013812	Cdk2ap1					CDK2 (cyclin-dependent kinase 2)-associated	0	0	0	0	1	0	0	0	0	0	0	0	1	0	0	0	0	0	0	0	0	0	0	0	0	0	1.18087	-0.111033	0.984267	-1.67557	-0.7893	-0.849433	-0.1203	-0.7413	-1.044	-1.22647	-0.207667	pos	-
	0	3036	cell cycle	NM_027165	Cdk3		Cdk3	YES		cyclin-dependent kinase 3	0	0	0	0	0	0	0	0	0	0	0	0	0	0	0	0	0	0	0	0	0	0	0	0	0	0	0.254933	-0.0232	-0.0853	0.185133	-0.307067	-0.111867	-0.113	-0.3131	-0.5528	-0.2692	-0.513967	-	-
	0	3051	cell cycle	NM_007668	Cdk5		Cdk5	YES		cyclin-dependent kinase 5	0	0	0	0	0	0	0	0	0	0	0	0	0	0	0	0	0	0	0	0	0	0	0	0	0	0	0.6709	-0.215767	1.15137	-0.906967	0.1759	0.795533	0.176	-0.0064	-0.5876	0.6405	0.110233	pos	-
	0	2389		NM_025876	Cdk5rap1					CDK5 regulatory subunit associated protein 1	0	0	0	0	0	0	0	0	0	0	0	0	0	0	0	0	0	0	0	0	0	0	0	0	0	0	0.1846	-0.514133	-0.0811667	-1.41643	-0.8563	-0.0259333	-0.168033	-0.258067	-0.5981	-0.188	-0.704167	-	neg
x	0	3039	cell cycle	NM_009873	Cdk6					cyclin-dependent kinase 6	0	0	0	0	0	0	0	0	0	0	0	0	0	0	0	0	0	0	0	0	0	0	0	0	0	0	0.3549	-0.290867	0.2423	0.168433	-0.5769	-0.0763667	0.0398667	0.150167	-0.659633	-0.387667	-0.525767	-	-
	0	2460	DNA repair	NM_009874	Cdk7					Cell division protein kinase 7 (EC 2.7.1.37) (CDK-activating kinase) (CAK) (TFIIH basal transcription factor complex kinase subunit) (39 kDa protein kinase) (P39 Mo15) (Protein-tyrosine kinase MPK-7) (CR4 protein	0	0	0	0	0	0	0	0	0	0	0	0	0	0	0	1	0	0	0	0	0	0	0	0	0	1	0.414133	-1.192	0.2948	-1.54883	-1.01953	-0.487567	-0.569133	-0.394333	-0.645467	-0.371833	-0.799667	-	neg
	0	3040	cell cycle	NM_153599	Cdk8					cyclin-dependent kinase 8 isoform a	0	0	0	1	0	0	1	0	0	0	0	0	2	0	0	0	0	0	0	0	0	0	0	0	0	0	0.766333	-1.14013	0.158233	-1.86183	-1.2586	-0.846633	-0.690467	-0.325833	-0.6048	-1.18397	-1.0988	pos	neg
	0	3041	cell cycle	NM_130860	Cdk9		Cdk9	YES		cyclin-dependent kinase 9	0	0	0	0	0	0	0	0	0	0	0	0	0	0	0	0	0	0	0	0	0	0	0	0	0	0	0.685467	0.0856333	0.323667	-2.37507	-0.2775	-0.203433	0.0596	-0.455667	-0.9739	-0.0764667	-0.0044	pos	-
	0	3052	cell cycle	NM_177270	Cdkl2	NM_177270	Cdkl2	YES		cyclin-dependent kinase-like 2 (CDC2-related	0	0	0	0	0	0	0	0	0	0	0	0	0	0	0	0	0	0	0	0	0	0	0	0	0	0	0.124033	-0.373033	0.846733	-0.0977333	-0.0735333	1.08263	-0.5324	0.3644	-0.309467	0.246367	-0.3674	-	-
	0	3042	cell cycle	NM_007669	Cdkn1a				p21	cyclin-dependent kinase inhibitor 1A (P21)	0	0	0	0	0	0	0	0	0	0	0	0	0	0	0	0	0	0	0	0	0	0	0	0	0	0	-1.9744	0.640567	-2.751	-2.28517	-1.0227	-1.0164	-0.9999	-1.9459	-1.04067	0.1726	-1.33183	neg	pos
	0	3043	cell cycle	NM_009875	Cdkn1b		Cdkn1b	YES		cyclin-dependent kinase inhibitor 1B (P27)	0	0	0	1	0	0	0	0	0	0	0	0	1	0	0	0	0	0	0	0	0	0	0	0	0	0	0.523	-0.896067	0.311567	-0.5889	-0.78	0.202633	-0.4752	-0.210533	-0.687867	-0.406	-0.458267	pos	neg
	0	3044	cell cycle	NM_009876	Cdkn1c					Cyclin-dependent kinase inhibitor 1C (Cyclin-dependent kinase inhibitor p57) (p57KIP2).	0	0	0	0	0	0	0	0	0	0	0	0	0	0	0	0	0	0	0	0	0	0	0	0	0	0	-2.52313	0.829867	-2.62947	0.4658	0.7736	0.0903667	1.4147	1.53907	-0.2536	-0.762933	-0.807767	neg	pos
	0	3046	cell cycle	NM_007670	Cdkn2b		Cdkn2b	YES		cyclin-dependent kinase inhibitor 2B (p15	0	0	0	0	0	0	0	0	0	0	0	0	0	0	0	0	0	0	0	0	0	0	0	0	0	0	-0.393233	-0.142733	-0.758567	-0.470133	0.617333	-0.277533	-0.0300333	-0.0671667	1.4876	1.7555	1.83193	-	-
	0	3048	cell cycle	NM_009878	Cdkn2d					cyclin-dependent kinase inhibitor 2D (p19	0	0	0	0	0	0	0	0	0	0	0	0	0	0	0	0	0	0	0	0	0	0	0	0	0	0	-0.134233	-0.3402	-0.464167	-1.4105	-1.0244	-0.279067	-0.411733	-0.709867	-1.39213	-0.581567	-0.849633	-	-
	0	3592		NM_026373	Cdk2ap2		Cdk2ap2	YES		DOC-1 related protein	0	0	0	0	0	0	0	0	0	0	0	0	0	1	0	0	0	0	0	0	0	0	0	0	0	1	0.1912	0.274233	0.186767	-1.35673	-0.4856	-0.505733	0.0984667	-0.461633	-1.04943	-0.154667	-0.0926333	-	-
	0	2391	cell cycle	NM_030248	Cdk5rap3		Cdk5rap3	YES		CDK5 regulatory subunit associated protein 3	0	0	0	0	0	0	0	0	0	0	0	0	0	0	1	0	0	0	0	0	0	0	0	0	0	1	0.0176667	0.665133	-0.1858	-1.6981	0.3086	0.304433	0.382533	-0.276933	-0.3457	1.0114	0.00403333	-	pos
	0	9372	FGF	NM_008007	Fgf3		Fgf3	YES		n/a	0	0	0	0	0	0	0	0	0	0	0	0	0	0	1	0	0	0	0	0	0	0	0	0	0	1	-0.134467	0.0305333	-0.368033	0.0629333	-0.0845	0.0834667	-0.200167	-0.2907	-0.518767	-0.202767	-0.3665	-	-
	0	4278	FGF	NM_010197	Fgf1	NM_010197		YES		fibroblast growth factor 1	0	0	0	0	0	0	0	0	0	0	0	0	0	0	0	0	0	0	0	0	0	0	0	0	0	0	-0.503833	-1.3334	0.538667	-1.1662	0.225033	1.43253	0.0387333	1.25553	0.8593	0.9982	0.700133	neg	neg
	0	4280	FGF	NM_183064	Fgf12	NM_183064		YES		fibroblast growth factor 12 isoform a	0	0	0	0	0	0	0	0	0	0	0	0	0	0	0	0	0	0	0	0	0	0	0	0	0	0	0.376067	-1.44043	1.1044	0.0788	-0.564133	1.0773	-0.720867	1.53953	0.796567	0.04	-0.436067	-	neg
	0	4281	FGF	NM_010200	Fgf13					fibroblast growth factor 13	0	0	0	0	0	0	0	0	0	0	0	0	0	0	0	0	0	0	0	0	0	0	0	0	0	0	-0.3598	0.1053	0.5128	1.53037	0.358267	1.65377	0.280233	0.6523	-0.1961	-0.410333	-0.483667	-	-
	0	4282	FGF	NM_207667	Fgf14	NM_207667	Fgf14	YES		fibroblast growth factor 14 isoform b	0	0	0	0	1	0	0	0	0	0	0	0	1	0	0	0	0	1	0	0	0	0	0	0	0	1	0.0317667	-0.6903	0.1729	-0.2906	-0.610767	0.142367	-0.6252	-0.0376	-0.564367	-0.480667	-0.1941	-	neg
	0	4266	FGF	NM_010201	Fgf14	NM_010201	Fgf14	YES		Fgf14	1	0	0	0	0	0	0	0	0	0	0	0	1	0	0	0	0	0	0	0	0	0	0	0	0	0	-0.166667	-0.833267	-0.0652667	0.0215	-0.651033	0.881133	-0.482933	-0.0543	-0.796967	-0.169367	-0.4731	-	neg
	0	10436		NM_030614	Fgf16					n/a	0	0	0	0	0	0	0	0	0	0	0	0	0	0	0	0	0	0	0	0	0	0	0	0	0	0	-0.6028	0.973067	-0.6227	1.81047	0.694867	0.313467	0.224533	0.0892	0.369567	0.375333	0.301867	neg	pos
	0	4284	FGF	NM_008004	Fgf17		Fgf17	YES	dorsal	fibroblast growth factor 17	0	0	0	0	0	0	0	0	0	0	0	0	0	0	0	0	0	0	0	0	0	0	0	0	0	0	-0.0221	0.0217667	0.0362333	0.132333	0.0634	-0.101833	-0.168333	-0.0772333	-0.206367	-0.0493667	-0.1099	-	-
	0	4285	FGF	NM_008005	Fgf18				dorsal	fibroblast growth factor 18	0	0	0	0	0	0	0	0	0	0	0	0	0	0	0	0	0	0	0	0	0	0	0	0	0	0	-0.2372	0.259467	-0.1737	0.165433	0.578567	0.5928	0.00706667	-0.0703	-0.235267	1.51273	-0.271867	-	-
	0	9371	FGF	NM_008006	Fgf2		Fgf2	YES		n/a	0	0	0	0	0	0	0	0	0	0	0	0	0	0	0	0	0	0	0	0	0	0	0	0	0	0	0.0521667	-0.3203	-0.1612	0.1406	0.00626667	-0.0659	-0.153967	-0.157067	-0.3472	0.7813	-0.124	-	-
	0	4286	FGF	NM_030610	Fgf20	NM_030610		YES		Fibroblast growth factor 20 (FGF-20).	0	0	0	0	0	0	0	0	0	0	0	0	0	0	0	0	0	0	0	0	0	0	0	0	0	0	0.235	0.1356	0.3039	0.395667	0.2189	-0.0419333	0.118867	0.0849333	0.0459667	-0.2302	0.118267	-	-
	0	10437		NM_023304	Fgf22		Fgf22	YES		n/a	0	0	0	0	0	0	0	0	0	0	0	0	0	0	0	0	0	0	0	0	0	0	0	0	0	0	0.2627	-0.115	0.0239	-0.293267	-0.2476	-0.2108	-0.0968667	-0.265967	-0.592067	-0.1937	-0.154333	-	-
	0	4287	FGF	NM_022657	Fgf23					fibroblast growth factor 23	0	0	0	0	0	0	0	0	0	0	0	0	0	0	0	0	0	0	0	0	0	0	0	0	0	0	-0.0918333	0.3185	-0.425833	1.0087	0.297467	0.0441	0.2266	0.0252	0.0171333	-0.0989	0.109933	-	-
	0	4288	FGF	NM_010202	Fgf4		Fgf4	YES		fibroblast growth factor 4	0	0	1	0	0	0	0	0	0	0	0	0	1	0	0	0	0	0	0	0	0	0	0	0	0	0	0.0200667	0.0641	-0.133167	0.146667	-0.0236	-0.00516667	0.0192	-0.172	0.0537333	-0.268633	0.0767	-	-
	0	4289	FGF	NM_010203	Fgf5					fibroblast growth factor 5	0	0	0	0	0	0	0	0	0	0	0	0	0	0	0	0	0	0	0	0	0	0	0	0	0	0	0.394867	-0.00113333	0.301967	0.257667	0.0272333	0.0152333	-0.114233	0.1156	-0.042	-0.168067	0.199967	-	-
	0	4290	FGF	NM_008008	Fgf7				dorsal	fibroblast growth factor 7	0	0	0	0	0	0	0	0	0	0	0	0	0	0	0	0	0	0	0	0	0	0	0	0	0	0	0.0367	-0.128533	0.513367	0.281267	0.1986	0.252933	-0.278833	0.0433	0.262467	0.3945	-0.0167333	-	-
	0	4291	FGF	NM_010205	Fgf8				ventral	fibroblast growth factor 8	0	0	0	0	0	0	0	0	0	0	0	0	0	0	0	0	0	0	0	0	0	0	0	0	0	0	0.3831	-0.0975333	-0.00263333	0.333667	-0.0530333	-0.104533	-0.151067	-0.1129	-0.463167	-0.1071	-0.121533	-	-
x	0	4294	FGF	NM_008010	Fgfr3					Fibroblast growth factor receptor 3 precursor (EC 2.7.1.112) (FGFR-3) (Heparin-binding growth factor receptor).	0	0	0	0	0	0	0	0	0	0	0	0	0	0	0	0	0	0	0	0	0	0	0	0	0	0	0.199233	-1.35393	0.540667	-2.7705	-1.00933	-1.15353	-0.230233	0.153633	0.00296667	-0.3169	-0.159167	-	neg
	0	4298	FGF	NM_054071	Fgfrl1		Fgfrl1	YES		fibroblast growth factor receptor-like 1	0	0	0	0	0	0	0	0	0	0	0	0	0	0	0	0	0	0	0	0	0	0	0	0	0	0	0.529733	1.04373	-0.1589	-2.47183	0.296733	-1.30137	0.254	-0.742833	0.0810667	1.32677	-0.3046	pos	pos
	0	4292	FGF	NM_013518	Fgf9					fibroblast growth factor 9	0	0	0	0	0	0	0	0	0	0	0	0	0	1	0	0	0	0	0	0	0	0	0	0	0	1	-0.259167	0.00913333	0.0992	1.2199	0.0345	1.0571	-0.150867	0.1268	-0.537	-0.251	-0.117133	-	-
x	0	4300	FGF	NM_010207	Fgfr2		Fgfr2	YES		fibroblast growth factor receptor 2 isoform	0	0	0	0	0	0	0	0	0	0	0	0	0	1	0	0	0	0	0	0	0	0	0	0	0	1	0.382067	-0.584433	0.0470333	-0.532433	-0.175233	0.471667	-0.137133	-0.1691	-0.113167	0.211033	0.0007	-	neg
x	0	11219		NM_008079	Galc		Galc	YES		NOD-derived CD11c #NAME? dendritic cells cDNA RIKEN full-length enriched library clone:F630106A07 product:galactosylceramidase full insert sequence.	0	0	0	0	0	0	0	0	0	0	0	0	0	0	0	0	0	0	0	0	0	0	0	0	0	0	0.2125	-1.22113	0.0493667	-1.9484	-0.242467	-0.533333	0.0711333	0.1378	0.546833	0.0128667	0.1943	-	neg
x	0	7789		NM_008321	Id3					inhibitor of DNA binding 3	0	0	1	0	0	0	0	0	0	0	0	0	1	0	1	0	0	0	0	0	0	0	0	0	0	1	-0.465267	-0.265733	-0.8486	-0.0120667	-1.04627	-1.91193	-0.267333	-1.00963	-1.68047	-0.664767	1.53153	-	-
x	0	5068	Notch	NM_010419	Hes5		Hes5	YES		hairy and enhancer of split 5	0	0	0	1	0	0	0	0	0	0	0	0	1	0	0	0	0	0	0	0	0	0	0	0	0	0	-0.0975667	-0.0766667	0.290633	-0.258533	-0.3106	-0.2487	1.3886	1.15757	-0.144133	-1.85873	0.287567	-	-
x	0	5070	Notch	NM_033041	Hes7		Hes7	YES		hairy and enhancer of split 7	0	0	0	0	0	0	1	0	0	0	0	0	1	0	0	0	0	0	0	0	0	0	0	0	0	0	0.1078	-0.1894	0.0524667	0.00153333	-0.0119	0.000266667	-0.0395	-0.0757667	-0.545567	0.2055	-0.00343333	-	-
x	0	5318	transcription factor	NM_010420	Hesx1		Hesx1	YES	dorsal, transcriptional target of OTX2	homeo box gene expressed in ES cells	0	0	0	0	0	0	0	0	0	0	0	0	0	0	0	0	0	0	0	0	0	0	0	0	0	0	-0.0266667	0.4088	0.1179	1.19473	0.3633	0.115667	0.0685333	0.0562	0.227067	0.102633	0.389867	-	-
x	0	5067	Notch	NM_008235	Hes1					hairy and enhancer of split 1	0	0	0	0	0	0	0	0	0	0	0	0	0	1	0	0	0	0	0	0	0	0	0	0	0	1	0.0318	-1.5729	-1.2116	-2.38597	-2.35867	-2.53733	-1.18043	-1.61127	-1.52953	-1.97063	-1.6694	-	neg
x	0	5071	Notch	NM_010423	Hey1		Hey1	YES	Hesr1	hairy/enhancer-of-split related with YRPW motif	0	0	0	0	0	0	0	0	0	0	0	0	0	0	0	0	0	0	0	0	0	0	0	0	0	0	-1.35973	0.0758	-1.65993	-2.45943	0.0549667	-0.844433	0.423267	0.435667	0.198967	0.200867	0.144167	neg	-
x	0	5066	Notch	NM_008237	Hes3		Hes3	YES		hairy and enhancer of split 3	0	0	0	0	0	0	0	0	0	0	0	0	0	1	0	0	0	0	0	0	0	0	0	0	0	1	-0.0604667	0.306833	-0.431733	1.01107	0.1169	0.0663	-0.0292333	-0.2335	-0.0263667	0.249	0.00266667	-	-
x	0	5073	transcription factor	NM_013905	Heyl		Heyl	YES		Hairy-related transcription factor 3	0	0	0	0	0	0	0	0	0	0	0	0	0	0	0	0	0	0	0	0	0	0	0	0	0	0	-0.262233	0.557467	-0.375633	1.44843	0.2876	0.210533	0.0541667	-0.105633	0.254633	0.0986667	0.336033	-	pos
x	0	5069	Notch	NM_019479	Hes6					hairy and enhancer of split 6	0	0	0	0	0	0	0	0	0	0	0	0	0	1	0	0	0	0	0	0	0	0	0	0	0	1	0.200033	0.9273	0.3693	-1.11403	-0.121333	-0.238367	0.619	0.108133	-0.9224	-0.997133	0.135333	-	pos
x	0	5072	Notch	NM_013904	Hey2				Hesr2	hairy/enhancer-of-split related with YRPW motif	0	0	0	0	0	0	0	0	0	0	0	0	0	1	0	0	0	0	0	0	0	0	0	0	0	1	-1.01323	-0.796933	-0.9869	-0.810667	-0.195033	-0.1238	0.2448	0.907167	0.607567	0.244333	-0.763267	neg	neg
	0	7720		NM_010512	Igf1					Igf1	0	0	0	0	0	0	0	0	0	0	0	1	1	0	0	0	0	0	0	0	0	0	0	0	0	0	-0.317067	-0.180367	0.0594333	0.334567	-0.0784667	0.799633	-0.193067	-0.0163667	-0.362033	-0.0802	-0.0171667	-	-
x	0	7829	IGF	NM_010514	Igf2					insulin-like growth factor 2	0	0	0	0	0	0	0	0	0	0	0	0	0	0	0	0	0	0	0	0	0	0	0	0	0	0	-2.4978	2.97523	-1.67887	4.28677	3.60257	0.868033	1.41737	0.7969	2.5614	2.83457	1.30007	neg	pos
	0	3556		NM_010495	Id1					DNA-binding protein inhibitor ID-1 (Inhibitor of DNA binding 1).	0	0	0	0	0	0	0	0	0	0	0	0	0	1	0	0	0	0	0	0	0	0	0	0	0	1	-0.883467	-0.515833	-1.35937	-1.39687	-1.17097	-1.21627	-0.358233	-0.4993	-1.73507	-0.641067	0.1861	neg	neg
x	0	7833	IGF	NM_010515	Igf2r					insulin-like growth factor 2 receptor	0	0	0	0	0	0	0	0	0	0	0	0	0	0	0	0	0	0	0	0	0	0	0	0	0	0	0.377167	-0.406133	-0.240567	-1.21703	-0.698233	-0.490167	-0.3956	-0.447567	-1.12217	-0.837333	-1.1329	-	-
	0	7840	IGF	NM_008340	Igfals					insulin-like growth factor binding protein acid	0	0	0	0	0	0	0	0	0	0	0	0	0	0	0	0	0	0	0	0	0	0	0	0	0	0	-0.0661	-0.0218333	-0.209033	0.758033	-0.0348	0.076	0.0861333	-0.2218	-0.144033	0.0526333	-0.146667	-	-
	0	7835	IGF	NM_008342	Igfbp2		Igfbp2	YES		insulin-like growth factor binding protein 2	0	0	0	0	0	0	0	0	0	0	0	0	0	0	0	0	0	0	0	0	0	0	0	0	0	0	-1.4186	0.222967	-2.71387	-4.92503	-2.53283	-4.80077	-1.20243	-2.69793	-2.616	-2.18657	-3.9971	neg	-
x	0	7788		NM_010496	Id2		Id2	YES	dorsal	inhibitor of DNA binding 2	0	0	0	0	0	0	0	0	0	0	0	0	0	1	0	0	0	0	0	0	0	0	0	0	0	1	-1.02363	0.179033	0.2708	-0.396133	0.6996	0.897	0.1714	0.941867	-0.393067	0.4305	1.41943	neg	-
	0	7839	IGF	NM_008344	Igfbp6					insulin-like growth factor binding protein 6	0	0	0	0	0	0	0	0	0	0	0	0	0	0	0	0	0	0	0	0	0	0	0	0	0	0	0.2128	-0.240733	-0.0956333	-0.169367	0.0461	0.0765333	-0.0849333	-0.0538333	-0.398967	-0.0677667	-0.100067	-	-
x	0	8062	Notch	NM_010588	Jag2					jagged 2	0	0	0	0	0	0	0	0	0	0	0	0	0	0	0	0	0	1	0	0	0	0	0	0	0	1	-0.643933	-0.488933	-0.650033	-0.308567	-0.502133	0.6882	-0.387467	-0.533833	-1.41153	-0.233333	-1.2636	neg	-
x	0	8063		NM_026365	Jagn1		Jagn1	YES		jagunal homolog 1	0	0	0	0	0	0	0	0	0	0	0	0	0	0	0	0	0	0	0	0	0	0	0	0	0	0	0.4313	0.478233	0.229533	-2.04303	-0.378233	-0.441267	0.1473	-0.353433	-0.1998	-0.0407667	0.0140333	-	-
x	0	8847	transcription factor	NM_001025245	Mbp	NM_001025245		YES		Mbp	0	0	0	0	0	0	0	0	0	0	0	0	0	0	0	0	0	1	0	0	0	0	0	0	0	1	-1.74127	0.305767	-0.798667	1.0606	1.09323	2.08657	-0.0132	0.0514	-0.219667	1.57497	-0.470033	neg	-
	0	10611		NM_023893	Ng23					n/a	0	0	0	0	0	0	0	0	0	0	0	0	0	0	0	0	0	0	0	0	0	0	0	0	0	0	0.421533	-0.1052	0.169467	-0.143833	-0.104433	-0.258067	-0.195433	-0.265933	-0.380467	-0.169033	-0.279933	-	-
	0	11166	transcription factor	NM_009123	Nkx1-2		Nkx1-2	YES		NK1 transcription factor related locus 2	0	0	0	0	0	0	0	0	0	0	0	0	0	0	0	0	0	0	0	0	0	0	0	0	0	0	0.177767	0.421967	-0.1599	1.0545	0.2357	0.0507667	0.0842	-0.195567	0.0329	0.0377	0.2597	-	-
x	0	11167	transcription factor	NM_010919	Nkx2-2					NK2 transcription factor related locus 2	0	0	0	0	0	0	0	0	0	0	0	0	0	0	0	0	0	0	0	0	0	0	0	0	0	0	-1.91153	-0.387333	-1.8044	-1.06527	0.345233	-0.210567	0.9768	1.28387	0.208767	-0.853133	-0.1343	neg	-
	0	11169	transcription factor	NM_008700	Nkx2-5					NK2 transcription factor related locus 5	0	0	0	0	0	0	0	0	0	0	0	0	0	0	0	0	0	0	0	0	0	0	0	0	0	0	0.228667	-0.135967	0.0645667	-0.0879	-0.00563333	-0.0098	-0.0697667	-0.189867	-0.4106	-0.00703333	-0.0744333	-	-
	0	11170	transcription factor	NM_010920	Nkx2-6					NK2 transcription factor related locus 6	0	0	0	0	0	0	0	0	0	0	0	0	0	0	0	0	0	0	0	1	0	0	0	0	0	1	0.0564	0.0554333	0.0518333	0.430533	0.1542	-0.0743	0.00253333	-0.0104333	-0.184533	0.0994	0.0438	-	-
	0	11171	transcription factor	NM_008701	Nkx2-9					NK2 transcription factor related locus 9	0	0	0	0	0	0	0	0	0	0	0	0	0	0	0	0	0	0	0	0	0	0	0	0	0	0	0.217467	-0.0708667	0.0843333	0.0543667	0.0229	-0.0512333	0.072	-0.118433	-0.386433	-0.00256667	-0.150567	-	-
	0	11172	transcription factor	NM_010921	Nkx3-1					NK-3 transcription factor locus 1	0	0	0	0	0	0	0	0	0	0	0	0	0	0	0	0	0	0	0	0	0	0	0	0	0	0	-0.3289	0.4127	-0.403367	0.9245	0.7151	0.143233	0.1879	0.0824	0.0948333	0.0847667	0.248233	-	-
	0	11173	transcription factor	NM_183248	Nkx6-2		Nkx6-2	YES		NK6 transcription factor related locus 2	0	1	0	0	0	0	0	0	0	0	0	0	1	0	0	0	1	0	0	0	0	0	0	0	0	1	0.0820667	-0.0701667	1.1536	0.531033	0.838	1.2083	-0.0201333	-0.0399333	0.8814	1.7333	0.212067	-	-
x	0	9256	transcription factor	NM_008666	Myt1l					Myelin transcription factor 1-like protein (MyT1L protein) (Postmitotic neural gene 1 protein) (Zinc finger protein Png-1) (Neural zinc finger factor 1) (NZF-1).	1	0	0	0	0	0	0	0	0	0	0	0	1	1	0	0	0	0	0	0	0	0	0	0	0	1	-0.3748	-1.87397	0.513933	-1.0882	-1.00917	1.54543	-1.10207	0.210733	-2.1073	-0.871833	-2.89673	-	neg
x	0	11267	Notch	NM_008714	Notch1					Notch gene homolog 1	0	0	0	0	0	0	0	0	0	0	0	0	0	0	0	0	0	0	0	0	0	0	0	0	0	0	1.14913	0.497567	1.22313	-2.7802	-0.278233	-0.680267	0.422033	0.231033	0.384633	-0.5463	0.6549	pos	-
x	0	9379	Notch	NM_010928	Notch2					n/a	0	0	0	1	0	0	0	0	0	0	0	1	2	0	0	0	0	0	0	0	0	0	0	0	0	0	0.144633	0.0259333	0.4024	1.72083	0.114633	1.28583	0.839867	0.0287333	-0.353367	1.94633	1.43467	-	-
x	0	11268	Notch	NM_008716	Notch3		Notch3	YES		Notch gene homolog 3	0	0	0	0	0	0	0	0	0	0	0	0	0	0	0	0	0	0	0	0	0	0	0	0	0	0	0.238867	0.214533	-0.135033	-2.11207	-0.229433	-0.423067	0.574667	0.0459667	0.484633	0.462533	-0.2374	-	-
x	0	11269	Notch	NM_010929	Notch4		Notch4	YES		Notch gene homolog 4	0	0	0	0	0	0	0	0	0	0	0	0	0	0	0	0	0	0	0	0	0	0	0	0	0	0	0.283433	-0.149467	0.00183333	1.25943	-0.100533	-0.0236333	0.0742	-0.192633	-0.234967	0.0605667	-0.00913333	-	-
	0	1889	BMP	NM_007555	Bmp5	NM_007555		YES		bone morphogenetic protein 5	0	0	0	1	0	0	0	0	0	0	0	0	1	0	0	0	0	1	0	1	0	0	0	0	0	2	0.137967	-0.557067	-0.3142	0.0932	-0.486767	-0.463267	-0.6628	-0.524467	-0.377167	-0.6467	-0.1676	-	neg
	0	3050	cell cycle	NM_001033443	Cdkl4					cyclin-dependent kinase-like 4	0	0	0	0	0	0	0	0	0	0	0	0	0	0	0	0	0	1	0	1	0	0	0	0	0	2	0.112567	-0.0355	0.1078	0.534233	0.275233	0.566633	-0.0843	-0.0496333	-0.186267	0.7088	-0.0418333	-	-
x	0	11783	transcription factor	NM_016968	Olig1		Olig1	YES		oligodendrocyte transcription factor 1	0	0	0	0	0	0	0	0	0	0	0	0	0	0	0	0	0	0	0	0	0	0	0	0	0	0	1.944	-0.3895	1.6327	-3.96747	-1.45587	-2.0989	0.385167	-0.754	-1.49953	-1.6391	-0.609967	pos	-
	0	11939		NM_011037	Pax2	NM_011037		YES		paired box gene 2	0	0	0	0	0	0	0	0	0	0	0	0	0	0	0	0	0	0	0	0	0	0	0	0	0	0	0.275167	0.4474	0.0361667	1.50127	0.0510667	0.148567	0.228967	-0.270933	-0.186433	0.0746333	0.0151333	-	-
	0	526		NM_008781	Pax3					9.5 days embryo parthenogenote cDNA RIKEN full-length enriched library clone:B130017N14 product:paired box gene 3 full insert sequence (Pax3 protein).	0	0	0	0	0	0	0	0	0	0	0	0	0	0	0	0	0	0	0	0	0	0	0	0	0	0	-0.295967	0.6816	-0.2774	1.53573	0.910967	0.1007	0.2525	0.382367	0.5507	0.0894333	0.1985	-	pos
	0	11940		NM_011038	Pax4		Pax4	YES	ARX target	paired box gene 4	0	0	0	0	0	0	0	0	0	0	0	0	0	0	0	0	0	0	0	0	0	0	0	0	0	0	-0.164867	0.6229	-0.133867	1.24737	0.3989	0.0576	0.212133	-0.0494667	0.2922	0.158767	0.132167	-	pos
x	0	11941		NM_013627	Pax6		Pax6	YES	dorsal	paired box gene 6	0	0	0	0	0	0	0	0	0	0	0	0	0	0	0	0	0	0	0	0	0	0	0	0	0	0	0.0144333	-1.00737	0.434167	-1.44983	-0.130733	0.5193	0.1207	0.631633	0.455333	0.628767	1.03493	-	neg
	0	11943		NM_011040	Pax8		Pax8	YES		paired box gene 8	0	0	0	0	0	0	0	0	0	0	0	0	0	0	0	1	0	0	0	0	0	0	0	0	0	1	-0.460467	0.489133	-0.867033	1.3846	0.547067	-0.407967	-0.1998	-0.2732	-0.0897	-0.354167	-0.178433	-	-
	0	11944		NM_011041	Pax9					paired box gene 9	0	0	0	0	0	0	0	0	0	0	0	0	0	0	0	0	0	0	0	0	0	0	0	0	0	0	-0.2541	0.407867	-0.0847	1.6709	0.8481	-0.0754333	0.0299667	0.434233	0.5569	0.185867	0.460233	-	-
	0	12009	transcription factor	NM_018878	Paxip1		Paxip1	YES		Pax transcription activation domain interacting	0	0	0	0	0	0	0	0	0	0	0	0	0	0	0	0	0	0	0	0	0	0	0	0	0	0	0.447833	-0.3368	0.217133	-0.155933	-0.247567	-0.0717	-0.1726	-0.2791	-0.3509	-0.358033	-0.143467	-	-
	0	12361	PDGF	NM_011058	Pdgfra	NM_011058		YES		platelet derived growth factor receptor alpha	0	0	0	0	0	0	0	0	0	0	0	0	0	0	0	0	0	0	0	0	0	0	0	0	0	0	-0.228933	-1.4318	-0.0259	-2.1768	-0.2599	0.268233	0.6427	0.9421	0.593733	-0.338833	-0.7035	-	neg
x	0	9254		NM_011123	Plp1		Plp1	YES		Myelin proteolipid protein (PLP) (Lipophilin).	0	0	0	0	0	0	0	0	0	0	0	0	0	0	0	0	0	0	0	0	0	0	0	0	0	0	-0.572367	-1.21473	5.07	-0.114267	3.9387	4.8715	-0.0887667	2.64283	5.26923	5.193	2.00707	neg	neg
x	0	13006		NM_019755	Plp2		Plp2	YES		proteolipid protein 2	0	0	0	0	0	0	0	0	0	0	0	0	0	0	0	0	0	0	0	0	0	0	0	0	0	0	-0.316467	0.783933	-1.31523	-0.2494	-0.564567	-1.67357	-1.0988	-1.99237	-2.03113	-1.22647	-1.4105	-	pos
x	0	14840	transcription factor	NM_009233	Sox1		Sox1	YES		SRY (sex determining region Y)-box 1	0	0	0	0	0	0	0	0	0	0	0	0	0	0	0	0	0	0	0	0	0	0	0	0	0	0	0.334033	-0.901333	0.431633	-0.7054	-0.749567	0.0585333	-0.0805	-0.2425	-0.9609	-0.476067	-0.401967	-	neg
x	0	14688	transcription factor	NM_011439	Sox13					SOX-13 protein.	0	0	0	0	0	0	0	0	0	0	0	0	0	0	0	0	0	0	0	0	0	0	0	0	0	0	0.779233	-0.834033	0.229633	-1.25107	-0.8117	-0.282533	-0.351967	-0.930933	-1.06963	-0.242967	-0.3529	pos	neg
x	0	14689	transcription factor	NM_009235	Sox15		Sox15	YES		SOX-15 protein.	0	0	0	0	0	0	0	0	0	0	0	0	0	0	0	0	0	0	0	0	0	0	0	0	0	0	0.1025	-0.2558	-0.0906667	0.2418	-0.1856	-0.1611	-0.00386667	-0.144767	-0.400033	-0.290433	-0.1485	-	-
x	0	14844	transcription factor	NM_011441	Sox17					SRY-box 17	0	0	0	0	0	0	0	0	0	0	0	0	0	0	0	0	0	0	0	0	0	0	0	0	0	0	0.345733	0.1206	-0.0616333	0.419633	0.0071	-0.1836	0.0745667	-0.0707333	-0.190567	-0.0899667	0.155367	-	-
x	0	15588	transcription factor	NM_009236	Sox18					Transcription factor SOX-18.	0	0	0	0	0	0	0	0	0	0	0	0	0	0	0	0	0	0	0	0	0	0	0	0	0	0	0.2294	-0.265233	0.0339333	0.005	-0.225233	-0.1903	-0.0436	-0.0835	-0.295033	-0.330567	-0.1506	-	-
x	0	10171	transcription factor	NM_145464	Sox21					n/a	0	0	0	0	0	0	0	0	0	0	0	0	0	0	0	0	0	0	0	0	0	0	0	0	0	0	0.587233	0.149733	0.958367	-0.583633	0.845233	0.7973	1.1711	0.998567	0.919367	0.618233	1.03573	pos	-
x	0	14842	transcription factor	NM_011444	Sox5	NM_011444		YES	dorsal	SRY (sex determining region Y)-box 5	0	0	1	0	0	0	0	0	0	0	0	0	1	0	0	0	0	0	0	0	0	0	0	0	0	0	-0.3817	-1.32077	-0.866367	-0.998733	-1.36477	-0.0623667	-0.0373333	-0.685567	-1.24247	-0.714	-0.8191	-	neg
x	0	14690	transcription factor	NM_001025560	Sox6		Sox6	YES		Sox6	0	0	0	0	0	0	0	0	0	0	0	0	0	0	0	0	0	0	0	0	0	0	0	0	0	0	0.144	-1.66373	0.3669	-2.6578	-0.4858	-0.1546	0.582967	1.1844	0.635767	-0.00976667	0.178067	-	neg
x	0	14845	transcription factor	NM_011446	Sox7					SRY-box 7	0	0	0	0	0	0	0	0	0	0	0	0	0	0	0	0	0	0	0	0	0	0	0	0	0	0	0.167233	-0.269933	-0.264	-0.147233	-0.317767	-0.304	-0.2318	-0.343933	-0.418333	-0.540967	-0.377233	-	-
x	0	14849	transcription factor	NM_011448	Sox9				SoxE gene	SRY-box containing gene 9	0	0	0	0	0	0	0	0	0	0	0	0	0	0	0	0	0	0	0	0	0	0	0	0	0	0	-0.668333	0.4649	-0.380967	1.2092	1.1521	-0.4299	0.798567	1.21097	1.69787	0.765067	1.26893	neg	-
	0	15560	transcription factor	NM_009327	Tcf1	NM_009327		YES		transcription factor 1	0	0	0	0	0	0	0	0	0	0	0	0	0	0	0	0	0	0	0	0	0	0	0	0	0	0	0.2209	0.0056	0.249233	-0.195767	-0.0869333	0.1604	0.464133	0.146767	-0.282367	0.293533	-0.0255667	-	-
	0	15562	transcription factor	NM_009328	Tcf15		Tcf15	YES		transcription factor 15	0	0	0	0	0	0	0	0	0	0	0	0	0	0	0	0	0	0	0	0	0	0	0	0	0	0	0.202033	-0.287133	-0.124533	0.0379333	-0.0605667	-0.137967	-0.120867	-0.287033	-0.5714	-0.139567	-0.2728	-	-
	0	15564	transcription factor	NM_013836	Tcf20	NM_013836	Tcf20	YES		transcription factor 20	0	0	0	0	0	0	0	0	0	0	0	0	0	0	0	0	0	0	0	0	0	0	0	0	0	0	0.0492667	-1.65483	0.553667	-0.1087	-0.484233	0.8885	0.00803333	0.0135	-0.733933	0.482533	-0.0765	-	neg
	0	15566	transcription factor	NM_053085	Tcf23	NM_053085	Tcf23	YES		transcription factor 23	0	0	0	0	0	0	0	0	0	0	0	0	0	0	0	0	0	0	0	0	0	0	0	0	0	0	-0.244733	0.4718	-0.3225	1.16727	0.282633	-0.0132	0.2576	0.0705333	0.2449	0.0008	0.1751	-	-
	0	121	T cell	NM_009333	Tcf7l2	NM_009333		YES		10 days neonate skin cDNA RIKEN full-length enriched library clone:4732431J15 product:transcription factor 7-like 2 T-cell specific HMG-box full insert sequence.	0	0	0	0	0	0	0	0	0	0	0	0	0	0	0	0	0	0	0	0	0	0	0	0	0	0	-0.777333	-0.557233	-0.405833	-1.25967	0.394267	0.4369	0.3198	0.9654	1.1111	0.3087	0.584333	neg	neg
	0	15571	transcription factor	NM_011547	Tcfap2a		Tcfap2a	YES		transcription factor AP-2 alpha	0	0	0	0	0	0	0	0	0	0	0	0	0	0	0	0	0	0	0	0	0	0	0	0	0	0	0.186033	0.605967	-0.0186667	1.0616	0.6614	-0.0852333	0.0208	-0.0999333	-0.317867	0.154767	0.111333	-	pos
	0	15231		NM_001025305	Tcfap2b	NM_001025305		YES		Tcfap2b	0	0	0	0	0	0	0	0	0	0	0	0	0	0	0	0	0	0	0	0	0	0	0	0	0	0	-0.0064	0.8116	0.0192	2.1721	0.805533	-0.0852667	0.1813	0.369867	0.537067	0.187933	0.803467	-	pos
	0	1825	transcription factor	NM_009335	Tcfap2c		Tcfap2c	YES		Blastocyst blastocyst cDNA RIKEN full-length enriched library clone:I1C0020M08 product:transcription factor AP-2 gamma full insert sequence.	0	0	0	1	0	0	0	0	0	0	0	0	1	0	0	0	0	0	0	0	0	0	0	0	0	0	-0.7215	0.713167	-0.682167	2.26937	1.04497	0.0972	0.0339	0.0784	0.0618333	-0.248633	0.0150333	neg	pos
	0	15573	transcription factor	NM_198960	Tcfap2e		Tcfap2e	YES		transcription factor AP-2 epsilon	0	0	0	0	0	0	0	0	0	0	0	0	0	0	0	0	0	0	0	0	0	0	0	0	0	0	0.0388333	-0.0041	-0.2934	0.0511333	-0.0901333	-0.0278333	0.0141	-0.210067	-0.4948	-0.191167	-0.363167	-	-
	0	15574	transcription factor	NM_031182	Tcfap4					transcription factor AP-4 (activating	0	0	0	1	0	0	0	0	0	0	0	0	1	0	0	0	0	0	0	0	0	0	0	0	0	0	-0.4165	-0.137633	-1.07313	-1.7183	-1.13857	0.397633	0.1103	-0.567733	-1.82647	-0.800633	-0.480633	-	-
	0	8877	transcription factor	NM_033476	Tcfcp2		Tcfcp2	YES		Melanocyte cDNA RIKEN full-length enriched library clone:G270085N22 product:transcription factor CP2 full insert sequence.	0	0	0	0	0	0	0	0	0	0	0	0	0	0	0	0	0	0	0	0	0	0	0	0	0	0	-0.0256667	-0.0610667	0.261867	-1.9788	-0.0187333	0.293433	0.605667	0.424767	0.0441333	0.754133	0.316667	-	-
	0	936	transcription factor	NM_023755	Tcfcp2l1					Adult male kidney cDNA RIKEN full-length enriched library clone:F530007A16 product:transcription factor CP2-like 1 full insert sequence.	0	0	0	0	0	0	0	0	0	0	0	0	0	0	0	0	0	0	0	0	0	0	0	0	0	0	-0.181467	0.563667	0.8718	1.43893	1.5284	1.1032	0.264133	0.393667	1.78327	3.8382	3.25333	-	pos
	0	1874	transcription factor	NM_172472	Tcfe3		Tcfe3	YES		Bone marrow macrophage cDNA RIKEN full-length enriched library clone:I830055K06 product:transcription factor E3 full insert sequence.	0	0	0	0	0	0	0	0	0	0	0	0	0	0	0	0	0	0	0	0	0	0	0	0	0	0	-0.0901	0.794733	-0.380367	-1.75097	0.309067	0.123433	0.625867	-0.137367	0.0589667	0.6211	0.4231	-	pos
	0	15582	transcription factor	NM_011549	Tcfeb		Tcfeb	YES		transcription factor EB	0	0	0	0	0	0	0	0	0	0	0	0	0	0	0	0	0	0	0	0	0	0	0	0	0	0	-0.571967	0.7172	-0.495967	-1.64023	-0.0565	-0.0392333	0.0308667	-0.482733	-0.160833	0.690367	0.262167	neg	pos
	0	15583	transcription factor	NM_031198	Tcfec					transcription factor EC	0	0	0	0	0	0	0	0	0	0	0	0	0	0	0	0	0	0	0	0	0	0	0	0	0	0	-0.0551333	0.372267	0.457833	0.950167	0.362967	-0.0593667	0.231033	0.2361	0.322067	0.0500667	0.456467	-	-
	0	15232		NM_178254	Tcfl5					Tcfl5 protein.	0	0	0	0	0	0	1	0	0	0	0	0	1	0	0	0	0	0	0	0	0	0	0	0	0	0	-0.00473333	-0.880367	-0.679567	-0.867167	-0.680867	-0.4267	-0.603633	-0.6494	-1.20343	-0.901367	-0.7359	-	neg
	0	15567	transcription factor	NM_009332	Tcf3				E47	transcription factor 3	0	0	0	0	0	0	0	0	0	0	0	0	0	1	0	0	0	0	0	0	0	0	0	0	0	1	-0.0829	0.888867	0.142533	-0.914033	1.04197	0.429	1.14747	0.2815	1.2664	1.479	0.919	-	pos
x	0	15425	receptor other	NM_009380	Thrb	NM_009380		YES		thyroid hormone receptor beta	0	0	0	0	0	0	0	0	0	0	0	0	0	0	0	0	0	0	0	0	0	0	0	0	0	0	0.1025	0.0376	0.0632333	0.310367	0.0838333	0.0002	-0.0185	-0.0501	0.0616667	-0.0206333	0.187367	-	-
	0	15428		NM_009381	Thrsp					thyroid hormone-responsive protein	0	0	0	0	0	0	0	0	0	0	0	0	0	0	0	0	0	0	0	0	0	0	0	0	0	0	-1.9552	1.03387	-1.31643	0.1543	2.21977	0.4567	0.190667	0.631433	1.5603	1.09613	1.54683	neg	pos
x	0	15422	receptor other	NM_178060	Thra					Thyroid hormone receptor alpha (C-erbA-alpha) (c-erbA-1).	0	0	0	0	0	0	0	0	0	0	0	0	0	1	0	0	0	0	0	0	0	0	0	0	0	1	-0.246433	-1.04987	0.252933	-1.33753	-0.921	0.789333	-0.1905	-0.417367	-1.09813	-0.0773667	-0.0838667	-	neg
	0	15386	receptor other	NM_011869	Thrap4					Thrap4 protein (NOD-derived CD11c #NAME? dendritic cells cDNA RIKEN full-length enriched library clone:F630101H14 product:thyroid hormone receptor associated protein 4 full insert sequence).	0	0	0	0	0	0	0	0	0	0	0	0	0	1	0	0	0	0	0	0	0	0	0	0	0	1	1.28603	0.1188	1.04547	-2.2079	-0.0989	0.432433	0.637533	-0.391767	-0.7461	0.659267	0.433533	pos	-
x	0	16681	transcription factor	NM_009537	Yy1	NM_009537		YES		YY1 transcription factor	0	0	0	0	0	0	0	0	0	0	0	0	0	0	0	0	0	0	0	0	0	0	0	0	0	0	-0.338333	-0.9092	-0.3776	-1.14957	-0.6805	-0.508367	-0.2783	0.153	0.1486	-0.5875	-0.491133	-	neg
					ccnd
[truncated: 9 more columns]
