# Supplementary material for: Differential Deployment of REST and CoREST Promotes Glial Subtype Specification and Oligodendrocyte Lineage Maturation
Source: PLoS One. 2009 Nov 3;4(11):e7665. doi: 10.1371/journal.pone.0007665 (PMC2766030; doi:10.1371/journal.pone.0007665)
Supplement: Table S3 — Comparative analysis of pathways enriched in REST and CoREST target genes for individual glial developmental cell types. The values in each row represent the degree of pathway enrichment (−LogP) for each set of target genes. Only pathways exhibiting statistical significance (−LogP>1.3) are included. Target genes were analyzed using Ingenuity Pathways Analysis (Ingenuity® Systems, www.ingenuity.com). (0.03 MB XLS) [file pone.0007665.s003.xls]

## Sheet: GLIAL  PATHWAYS
Analysis	Ingenuity Canonical Pathways	-Log(P-value)	Genes
REST pmOL	Pyrimidine Metabolism	2.36	POLD2,DPYS,POLD1,POLE,CTPS,TYMP,POLR2B,DPYSL3,POLA2,DPYD,PUS3,UCKL1,POLR2J,APOBEC1
REST pmOL	Folate Biosynthesis	2.16	FOLH1,DHFR,DDX6
REST pmOL	VDR/RXR Activation	1.99	NCOR2,HR,CEBPA,RUNX2,MXD1,CALB1,RXRG,WT1,TRPV5
REST pmOL	Lysine Degradation	1.69	SUV39H2,ALDH9A1,HSD17B4,LTA4H,SHMT2,ACAT2,EHMT1
REST pmOL	One Carbon Pool by Folate	1.63	DHFR,MTHFD2 (includes EG:10797),SHMT2
REST pmOL	Œ≤-alanine Metabolism	1.62	ALDH9A1,ACAD11,DPYSL3,DPYD,DPYS,GAD1
REST pmOL	Aminoacyl-tRNA Biosynthesis	1.57	YARS2,TARSL2,WARS2,SARS,RARS2
REST pmOL	Glucocorticoid Receptor Signaling	1.53	MAPK7,GTF2F1,MAP3K14,GTF2F2,SMARCD2,CEBPA,STAT3,TAF9,HSPA1L,POU2F1,POLR2B,NCOR2,HSPA4,TNF,FOS,TAF3,CHUK,SHC1,POLR2J,SERPINE1
REST pmOL	Aryl Hydrocarbon Receptor Signaling	1.53	ALDH9A1,NCOR2,GSTM5,TNF,DHFR,RARB,MAPK7,FOS,RARG,NFIB,RXRG
REST pmOL	Protein Ubiquitination Pathway	1.39	PSME1,UBE2J2,TAP1,ANAPC10,PSMA2,BIRC6,FZR1,PSMC4,UBE4A,THOP1,AMFR,UBE3A,BRCA1,NEDD4,PSMD13
REST pmOL	Valine, Leucine and Isoleucine Degradation	1.38	ALDH9A1,ACAD11,HSD17B4,MCEE,ACAT2
REST pmOL	EGF Signaling	1.32	MAPK7,FOS,SHC1,STAT3
REST OLpre	Metabolism of Xenobiotics by Cytochrome P450	2.78	ADHFE1,CYP2E1,GSTA1,GSTA2
REST OLpre	Bile Acid Biosynthesis	1.93	BAAT,SRD5A2,ADHFE1
REST myOL	NRF2-mediated Oxidative Stress Response	3.29	FOSL1,ACTG1,HERPUD1,DNAJC16,MAPK12,FKBP5,DNAJA1,DNAJC3,DNAJC1,MAF,PIK3CB,DNAJB8,PRKCA,ERP29,MRAS,CAT,SCARB1,ACTB,DNAJC6
REST myOL	Circadian Rhythm Signaling	2.78	ADCYAP1,CSNK1D,BHLHB3,GRIN1,DUSP2,CSNK1E,VIP
REST myOL	Glucocorticoid Receptor Signaling	2.61	MED1,SMAD4,MAPK12,CEBPA,CCNH,FKBP5,STAT3,MAPK11,NFATC1,TAF3,MRAS,SMARCD2,BCL3,POU2F1,ERCC2,POLR2B,PIK3CB,NCOR2,POU2F2,GTF2A1,SMARCA2,TNF,NR3C1,CHUK,VIPR1,POLR2J
REST myOL	Death Receptor Signaling	2.26	TNFRSF25,TNF,DAXX,TNFRSF21,CASP8,DIABLO,CHUK,BCL3,MAP4K4
REST myOL	IL-4 Signaling	1.96	NFATC1,PIK3CB,IRS1,NR3C1,MRAS,SOCS1
REST myOL	B Cell Activating Factor Signaling	1.96	NFATC1,CHUK,MAPK12,BCL3,TNFRSF13C,MAPK11
REST myOL	Œ≤-alanine Metabolism	1.9	ACAD11,ACADVL,DPYSL3,DPYD,CRMP1,ALDH4A1,GAD1
REST myOL	Apoptosis Signaling	1.88	PRKCA,TNF,CASP8,DIABLO,CHUK,MRAS,MAPK12,BCL3,CAPN5,MAP4K4
REST myOL	Amyloid Processing	1.87	CSNK1D,MAPK12,CAPN5,MAPK11,CSNK1E,PSEN2,CDK5R1,CSNK1A1
REST myOL	IL-9 Signaling	1.78	PIK3CB,IRS1,TNF,BCL3,STAT3
REST myOL	SAPK/JNK Signaling	1.73	MAPK8IP3,NFATC1,PIK3CB,IRS1,DAXX,MRAS,MAPK12,RAC3,MAPK8IP2,MAP4K4
REST myOL	NF-Œ∫B Activation by Viruses	1.69	PIK3CB,PRKCA,ITGA5,CHUK,MRAS,MAPK12,BCL3
REST myOL	IL-10 Signaling	1.69	TNF,CHUK,MAPK12,BCL3,STAT3,MAPK11,MAP4K4,LBP
REST myOL	Induction of Apoptosis by HIV1	1.69	TNF,DAXX,CASP8,DIABLO,CHUK,MAPK12,BCL3,SLC25A4
REST myOL	Wnt/Œ≤-catenin Signaling	1.69	SOX3,WNT9A,SOX8,WNT5A,TLE3,CCND1,GNAO1,WNT10B,SMO,CSNK1A1,ACVR2B,CSNK1D,SOX11,RARG,CSNK1E
REST myOL	Calcium Signaling	1.59	RYR2,MAPK12,CAMK2D,ASPH,ATP2B3,NFATC1,GRIN3B,CHRNB2,SLC8A2,GRIN1,CAMK1,TRPC7,GRIA2,CALM2,ATP2B2
REST myOL	IL-15 Signaling	1.5	PIK3CB,MRAS,MAPK12,RAC3,STAT3,MAPK11,IL15RA
REST myOL	GABA Receptor Signaling	1.5	GABRD,GABRG1,GABRG2,SLC6A1,GABRR1,GAD1,AP2A1
REST myOL	Amyotrophic Lateral Sclerosis Signaling	1.42	PIK3CB,GRIN3B,CACNA1A,GRIN1,NEFM,CAT,CAPN5,GRIK5,GRIA2
REST myOL	VEGF Signaling	1.42	PIK3CB,PRKCA,ACTG1,EIF1AY,EIF2S2,MRAS,MAPK12,FLT1,ACTB
REST myOL	Pyrimidine Metabolism	1.39	NT5E,POLS,CRMP1,AK3L1,CTPS,POLR2B,CHRAC1,DPYSL3,POLA2,DPYD,PUS3,UCKL1,POLR2J
REST myOL	Inositol Phosphate Metabolism	1.39	IMPA1,PLCL2,CSNK1A1,SYNJ2,PIK3CB,CSNK1D,SEC16A,HIPK1,PI4K2B,PI4K2A,ITPKA,PRKX,SGK1
REST myOL	Chemokine Signaling	1.34	PRKCA,MRAS,MAPK12,CAMK1,CAMK2D,MAPK11,CALM2
REST myOL	Estrogen Receptor Signaling	1.34	POLR2B,NCOR2,GTF2A1,NR3C1,MED1,TAF3,MRAS,MAPK12,CTBP2,CCNH,POLR2J,ERCC2
REST myOL	Oncostatin M Signaling	1.3	CHI3L1,TIMP3,MRAS,MAPK12,STAT3
REST myOL	Serotonin Receptor Signaling	1.3	SLC18A3,HTR5A,SLC6A4,TPH2,HTR1A
REST AS	Tyrosine Metabolism	1.57	TAT,ADHFE1,ADH7
CoREST pmOL	Œ≤-alanine Metabolism	2.12	ACAD11,ACADVL,DPYSL3,DPYD,DPYS,ALDH4A1,GAD1
CoREST pmOL	VDR/RXR Activation	1.75	NCOR2,PRKCH,SEMA3B,IGFBP1,HOXA10,CEBPA,CASR,IGFBP5,KLK6,TRPV5
CoREST pmOL	Axonal Guidance Signaling	1.73	GIT1,PRKCH,SEMA6B,GNB4,WNT2B,L1CAM,EFNA1,GLIS2,EFNB3,FZD10,SEMA3B,BAIAP2,GLI1,PDGFB,PRKACB,SEMA4A,LIMK1,EPHB1,PAK1,PRKAG1,WNT9A,EPHA10,GNAO1,DOCK1,WNT10B,ADAM19,RAP1B,SEMA4D,FZD5,EPHB4,ITGB1
CoREST pmOL	Interferon Signaling	1.7	IFITM1,TYK2,PSMB8,IFNAR2,IFNGR2
CoREST pmOL	Wnt/Œ≤-catenin Signaling	1.59	WNT9A,SOX8,CSNK2B,WNT2B,GNAO1,WNT10B,CSNK1A1,APC2,FZD10,FRZB,SOX4,FZD5,LEF1,SOX11,CSNK1E,RARG,NLK,AXIN1
CoREST pmOL	Valine, Leucine and Isoleucine Degradation	1.52	ACAD11,ACADVL,OXCT1,ALDH4A1,ACAA2,HMGCS1
CoREST pmOL	Amyloid Processing	1.43	PRKAG1,CSNK2B,PRKACB,CAPN5,CSNK1E,MAPT,CSNK1A1
CoREST pmOL	Pantothenate and CoA Biosynthesis	1.39	DPYSL3,DPYD,DPYS,COASY
CoREST OLpro	PPARŒ±/RXRŒ± Activation	1.97	MAP2K4,CD36,MED1,PRKAA1,CHUK,CLOCK,ADIPOQ,SOS1,JAK2,PRKAR2B,SMAD2,PPARGC1A
CoREST OLpro	TR/RXR Activation	1.59	KLF9,MED1,HIF1A,AKT3,PIK3C2A,PDE3B,TBL1XR1,PPARGC1A
CoREST OLpro	p53 Signaling	1.44	CDKN2A,PRKDC,MED1,PCNA,STAG1,AKT3,PIK3C2A,CCNK
CoREST OLpro	Cardiac Œ≤-adrenergic Signaling	1.37	GNG11,GNG10,GNG5,PRKAR2B,PDE3B,PPP2R5A,SLC8A1,PDE10A,GNG12
CoREST OLpre	Androgen and Estrogen Metabolism	2.64	UGT1A10 (includes EG:54575),SULT2B1,SRD5A2,SULT1E1,SULT2A1,HSD17B12,EBP,UGT1A5,NSDHL
CoREST OLpre	Pentose and Glucuronate Interconversions	1.55	UGT1A10 (includes EG:54575),UCHL3,UCHL1,UGT1A5
CoREST OLpre	Complement System	1.55	C8A,C1R,MBL2,CD46
CoREST OLpre	Pantothenate and CoA Biosynthesis	1.46	UPB1,DPYSL3,DPYD,PANK1,ENPP1
CoREST OLpre	Sulfur Metabolism	1.39	SULT2B1,SULT1E1,SULT2A1
CoREST myOL	Pyruvate Metabolism	2.53	LDHA,HAGHL,NUDT7,ALDH1B1,IL21R,ALDH4A1,DLD
CoREST myOL	Œ≤-alanine Metabolism	2.34	ACADVL,ALDH1B1,DPYSL3,DPYD,DPYS,ALDH4A1,GAD1
CoREST myOL	Wnt/Œ≤-catenin Signaling	2.31	WNT9A,SOX8,WIF1,WNT5A,FZD8,CCND1,GNAO1,PPP2R2C,WNT10B,CSNK1D,SFRP5,UBC,SOX2,LEF1,WNT3,SOX11,CSNK1E,RARG,LRP1
CoREST myOL	G-Protein Coupled Receptor Signaling	2.24	PRKAG1,PLCB1,ATF4,MAPK1,ADRBK1,CAMK2D,ADORA2B,STAT3,GNAO1,S1PR2,ADRB3,CAMK2A,RGS7,BDKRB1,ADRA2A,CHUK,RGS16,PIK3R3,GRM3
CoREST myOL	Hepatic Cholestasis	2.04	PPARA,PRKAG1,PRKCH,TNF,MAP3K4,CHUK,ATP8B1,PRKCI,FGFR4,LBP,HNF4A,TAP2
CoREST myOL	Death Receptor Signaling	2.03	TNFRSF25,HSPB7,TNF,TNFRSF21,CASP8,DIABLO,CHUK,BCL2
CoREST myOL	Glutamate Receptor Signaling	2.03	GRIP1,GNB3,GRIK5,HOMER3,GRIK4,HOMER1,SLC1A7,GRM3
CoREST myOL	Butanoate Metabolism	2.01	ALDH1B1,OXCT1,ALDH4A1,DCXR,GAD1,HMGCS1
CoREST myOL	Aryl Hydrocarbon Receptor Signaling	1.88	NCOR2,HSPB7,TNF,ALDH1B1,MAPK1,CCND1,ALDH4A1,GSTT2,ALDH3B1,RARG,NFIB
CoREST myOL	Circadian Rhythm Signaling	1.86	CSNK1D,BHLHB3,ATF4,CLOCK,CSNK1E
CoREST myOL	Leukocyte Extravasation Signaling	1.69	PRKCH,CLDN15,MMP11,PTK2,JAM2,CYBA,MAP3K4,ARHGAP8,CLDN4,VAV2,ITGB1,PIK3R3,THY1,PRKCI,CLDN7,GNAI3,MMP28
CoREST myOL	Neuregulin Signaling	1.64	PRKCH,MAPK1,NRG3,ITGB1,MATK,PIK3R3,PRKCI,TMEFF2,CDK5R1
CoREST myOL	Synaptic Long Term Potentiation	1.62	GRIN3B,PRKAG1,PRKCH,PLCB1,PPP1R14B,ATF4,MAPK1,CAMK2D,PRKCI,GRM3,CAMK2A
CoREST myOL	GABA Receptor Signaling	1.56	GABRD,GABRA5,SLC6A1,UBC,GAD1,AP2A1
CoREST myOL	GM-CSF Signaling	1.48	MAPK1,CCND1,CAMK2D,STAT3,CSF2RA (includes EG:1438),PIK3R3,PIM1,CAMK2A
CoREST myOL	Xenobiotic Metabolism Signaling	1.37	PRKCH,MAPK1,CAMK2D,ALDH4A1,PPP2R2C,CAMK2A,NCOR2,GRIP1,TNF,MAP3K4,ALDH1B1,PIK3R3,GSTT2,ALDH3B1,PRKCI
CoREST myOL	Inositol Phosphate Metabolism	1.36	CSNK1D,SEC16A,HIPK1,EIF2AK2,PRKCH,PLCB1,PI4K2B,MAPK1,PIK3R3,PIM1,INPP4A,PRKX
CoREST myOL	Histidine Metabolism	1.35	ALDH1B1,ALDH4A1,ALDH3B1,METTL1
CoREST myOL	Glycolysis/Gluconeogenesis	1.31	LDHA,ALDH1B1,PGAM2,IL21R,ALDH4A1,ALDH3B1,DLD
CoREST myOL	cAMP-mediated Signaling	1.3	RGS7,ATF4,ADRBK1,ADRA2A,MAPK1,ADORA2B,CAMK2D,STAT3,GNAO1,ADRB3,GRM3,CAMK2A
CoREST AS	Riboflavin Metabolism	1.45	TYR,FLAD1 (includes EG:80308)
