# Supplementary material for: Differential Deployment of REST and CoREST Promotes Glial Subtype Specification and Oligodendrocyte Lineage Maturation
Source: PLoS One. 2009 Nov 3;4(11):e7665. doi: 10.1371/journal.pone.0007665 (PMC2766030; doi:10.1371/journal.pone.0007665)
Supplement: Table S4 — Selective profiles of REST and CoREST target genes encoding factors with known roles in glial developmental cell types. (0.76 MB XLS) [file pone.0007665.s004.xls]

## Sheet: Table S4
Gene	notes…	OLpres REST	OLpros REST	pmOLs REST	myOLs REST	ASs REST	OLpres COREST	OLpros COREST	pmOLs COREST	myOLs COREST	ASs COREST
Alox5		0	0	0	0	1	0	0	0	0	1
Ascl1	Mash1	0	0	1	1	0	0	0	1	1	0
Bmpr1a		0	0	0	0	0	1	0	0	0	0
Bmpr2		0	0	1	0	0	0	0	0	0	0
Ccnd1		0	0	0	1	0	0	0	0	1	0
Ccndbp1		0	0	1	0	0	0	0	0	0	0
Ccr7		1	0	0	0	0	1	0	0	0	0
Cd44		0	0	0	0	0	1	0	0	0	0
Cd9		0	0	0	0	0	0	1	0	0	0
Cdkn2a	p16INK4a	0	0	0	0	0	0	1	0	0	0
Cntf		0	0	0	1	0	0	0	0	1	0
Cntn1		0	0	0	0	0	1	0	0	0	0
Ctsl		0	0	0	0	0	0	1	0	0	0
Cyba		0	0	0	1	0	0	0	0	1	0
Dub1a		0	0	0	0	0	1	0	0	0	0
Ehmt1		0	1	1	1	0	0	0	0	0	0
Erbb2ip		0	1	0	0	0	0	1	0	0	0
Fbxo22		0	1	0	0	0	0	0	0	0	1
Fgfr1		0	0	1	0	0	0	0	0	0	0
Gap43		0	0	0	0	0	0	0	1	0	0
Gje1		0	0	0	0	0	1	0	0	0	0
Gm691		1	1	1	1	0	0	0	1	1	0
Gpr158		1	1	1	1	0	0	0	0	0	0
H2-M2		1	0	0	0	1	1	1	1	0	0
Hes2		0	0	0	1	0	0	0	0	0	0
Hoxa2		0	0	0	0	0	0	0	1	0	0
Id4		0	0	0	1	0	1	0	0	0	0
Igf1r		0	0	0	1	0	0	1	0	0	0
Igsf11		0	0	0	0	0	0	1	1	1	0
Il2ra		0	0	0	0	0	0	0	0	1	0
Il8rb		1	0	0	0	0	1	0	0	0	0
Irf1		0	0	0	1	0	0	0	0	0	0
Itgb1		0	0	0	0	0	0	0	1	1	0
Jag1		0	0	1	1	0	0	0	0	1	0
Jmjd1a		0	1	1	1	0	0	0	0	0	0
Kcnj10		0	0	0	0	0	0	0	1	1	0
Klf9		0	1	0	0	0	0	1	0	0	0
Lhx3		0	1	1	1	0	0	0	0	0	0
Lifr		0	1	0	0	0	0	0	0	0	0
Lmo3		0	1	0	1	1	1	0	0	0	1
Mal		0	0	0	1	0	0	0	1	1	0
Mbp		0	0	1	0	0	0	0	0	0	0
Med12		0	0	0	0	0	0	0	1	0	0
Mef2d		0	0	0	0	0	0	1	0	0	0
Mobp		0	0	0	0	0	1	0	0	0	0
Mpzl1		0	0	1	1	0	0	0	0	1	0
Mxd1		0	0	1	0	1	0	0	0	0	1
Myt1		0	0	0	1	0	0	0	0	0	0
Ncor2		0	0	1	1	0	0	0	1	1	0
Neurod4	Math3	0	1	0	1	0	0	0	0	0	0
Neurod6	Math2	0	0	0	0	0	1	0	0	0	0
Nf1		0	0	1	1	0	0	0	1	1	0
Nkx6-1		0	0	0	1	0	0	0	1	0	0
Nog		0	0	0	1	0	0	0	0	0	0
Nrg3		0	0	0	1	0	0	0	1	1	0
Nrg4		0	0	0	0	0	0	1	0	0	0
Olig2		0	0	0	0	0	0	0	1	0	0
P2ry10		1	1	0	0	0	1	0	0	0	1
Pdgfb		0	0	0	0	0	0	0	1	1	0
Pdgfc		1	0	0	0	0	1	0	0	0	1
Pou3f2	Brn2	0	0	0	0	0	0	0	1	1	0
Prkca		0	0	0	1	0	0	0	0	0	0
Prl		1	0	0	0	0	1	0	0	0	0
Ptbp2		0	0	0	1	0	1	0	0	0	0
Ptgs2		0	0	0	0	0	0	0	0	0	1
Rarb		0	0	1	0	0	0	0	0	0	0
Rarg		0	0	1	1	0	0	0	1	1	0
Rarres2		0	0	0	1	0	0	1	1	1	0
Rb1		0	1	0	0	0	0	0	0	0	0
Rbl1		0	0	0	1	0	0	0	0	1	0
Ripk2		0	0	0	1	0	0	1	1	1	0
Rxrg		0	0	1	0	0	0	0	0	0	0
S100a10		0	0	0	0	0	0	1	0	0	0
Sema3a		0	0	0	0	0	0	1	0	0	0
Sept5		0	0	0	0	0	0	0	1	0	0
Shc3		0	0	0	0	1	1	0	0	0	0
Slc12a5		1	1	1	1	0	0	0	1	1	0
Slc1a3		0	0	1	0	0	0	0	0	0	0
Smad4		0	0	0	1	0	0	0	1	1	0
Smad5		0	0	0	0	0	1	0	0	0	0
Smo		0	0	0	1	0	0	0	0	0	0
Sox11		0	0	1	1	0	0	0	1	1	0
Sox12		0	0	1	0	0	0	1	0	0	0
Sox2		0	0	1	0	0	0	0	0	1	0
Sox3		0	0	0	1	0	0	0	0	0	0
Sox4		0	0	1	0	0	0	0	1	0	0
Sox8		0	0	1	1	0	0	0	1	1	0
Spp1		0	0	0	0	0	1	0	0	0	0
Stmn2		0	1	0	1	0	0	0	0	1	0
Stmn3		0	0	1	1	0	0	0	0	0	0
Syt4		1	1	1	1	0	0	0	0	0	0
Tap2		0	0	0	0	0	0	0	0	1	0
Tcf12	HEB	0	1	0	0	0	0	0	0	0	0
Tcf4		0	0	0	0	0	1	0	0	0	0
Tcfe2a	E2A	0	0	0	1	0	0	0	1	1	0
Tmem10	Opalin	0	0	0	0	0	0	0	0	1	0
Trpc3		0	0	0	0	0	0	1	0	0	0
Wsb1		0	0	0	0	0	0	0	0	0	1
Zbtb38		0	0	1	0	1	0	0	0	0	1
Zfp281		1	0	0	0	0	0	0	0	0	0
Zfp488		0	0	0	1	0	0	0	0	0	0
Zic2		0	0	0	1	0	0	0	0	1	0

## Sheet: Solen OL genes
x	Oligo?	ID	Category	RefSeq	Gene	OldRE1?	NewRE1?	RE1	notes…	Description	NSC REST	NOP REST	RG REST	CN REST	GABA REST	GLUT REST	MSN REST	NG2 REST	O4 REST	O1 REST	MBP REST	AS REST	REST	NSC COREST	NOP COREST	RG COREST	CN COREST	GABA COREST	GLUT COREST	MSN COREST	NG2 COREST	O4 COREST	O1 COREST	MBP COREST	AS COREST	CR1	NOP	RG	CN	GABA	GLUT	MSN	NG2	O4	O1	MBP	AS	NOP	RG
	4	7837	IGF	NM_010517	Igfbp4				dorsal	insulin-like growth factor binding protein 4	0	0	0	0	0	0	0	0	0	1	1	0	2	0	0	0	0	0	0	0	0	0	1	1	0	2	-0.807267	-0.743167	-2.26403	-1.90207	-2.6768	-2.78737	-1.95257	-2.67773	-2.7206	-3.2134	-3.027	neg	neg
x	4	14843	transcription factor	NM_009234	Sox11		Sox11	YES		SRY-box 11	0	0	0	0	0	0	0	0	0	1	1	0	2	0	0	0	0	0	0	0	0	0	1	1	0	2	-0.176833	-0.939633	0.871433	-1.4489	-0.394567	0.319333	-0.8806	0.991433	-0.740867	-2.01267	-0.406767	-	neg
x	4	14848	transcription factor	NM_011447	Sox8		Sox8	YES	SoxE gene	SRY-box containing gene 8	0	0	0	0	0	0	0	0	0	1	1	0	2	0	0	0	0	0	0	0	0	0	1	1	0	2	-0.5362	0.2915	-0.5897	-0.771833	-1.12207	-0.2383	1.4488	0.328633	-1.16407	-0.736633	-0.360133	neg	-
	3	4283	FGF	NM_008003	Fgf15		Fgf15	YES		fibroblast growth factor 15	0	0	0	0	0	0	0	0	0	1	1	0	2	0	0	0	0	0	0	0	0	0	0	1	0	1	-0.597	-1.31287	-1.48797	-1.36883	-1.43453	-0.771133	-0.84	-1.2488	-1.782	-1.3642	-1.77153	neg	neg
x	3	8061	Notch	NM_013822	Jag1					jagged 1	0	0	0	1	0	1	1	0	0	1	1	0	5	0	0	0	0	1	0	0	0	0	0	1	0	2	0.0611667	-1.32673	-0.336533	-1.02327	-1.42683	-1.289	-0.7004	-0.0544667	-0.599567	-2.03847	-1.39283	-	neg
	3	15569	T cell	x	Tcf7					transcription factor 7 T-cell specific	0	0	0	0	0	0	0	0	0	0	1	0	1	0	0	0	0	0	0	0	0	0	1	1	0	2	1.10927	-0.456367	-0.279167	-1.749	-1.58893	-1.20013	-0.883167	-1.5741	-1.89243	-1.08883	-1.3369	pos	-
x	3	15572	transcription factor	NM_153154	Tcfap2d					transcription factor AP-2 delta	0	0	0	0	0	0	0	0	1	0	0	0	1	0	0	0	0	0	1	0	1	0	1	0	0	3	-0.313433	0.102767	-0.379133	0.227067	0.09	0.307067	-0.236267	-0.0786	-0.769433	-0.370067	-0.370733	-	-
	3	15580	transcription factor	NM_011548	Tcfe2a		Tcfe2a	YES		Transcription factor E2-alpha (Immunoglobulin enhancer-binding factor E12/E47) (Transcription factor 3) (TCF-3) (Transcription factor A1).	0	0	0	0	0	0	0	0	0	0	1	0	1	1	0	0	0	0	0	0	0	0	1	1	0	3	0.846967	-0.1121	-0.1085	-2.6403	-0.7499	-0.8949	-0.0069	-0.877067	-1.66403	-1.10247	-0.326667	pos	-
	3	15807		NM_027212	Thrap6					TRAP/Mediator complex component TRAP25	0	0	0	0	0	0	0	0	0	0	1	0	1	0	0	0	1	0	0	0	0	1	0	1	0	3	0.0247	-0.186733	0.0717	-1.35753	-0.999767	-1.24967	-0.6081	-0.00126667	-0.529433	-1.34867	-0.669133	-	-
	2	3037	cell cycle	NM_009871	Cdk5r1		Cdk5r1	YES		cyclin-dependent kinase 5 regulatory subunit	0	0	0	0	0	0	0	0	0	0	1	0	1	0	0	0	0	0	0	0	0	0	0	1	0	1	-0.6158	0.0005	0.941467	0.2333	0.896467	1.8405	0.3484	1.3766	0.0107667	-0.3968	0.001	neg	-
	2	3047	cell cycle	NM_007671	Cdkn2c					cyclin-dependent kinase inhibitor 2C (p18	0	0	0	0	0	0	0	0	0	1	0	0	1	1	0	0	0	0	0	0	0	0	0	1	0	2	1.17707	-0.884867	0.201033	-2.52987	-2.33983	-1.7241	-0.675933	-1.72267	-1.82307	-2.1686	-0.694767	pos	neg
	2	4299	FGF	NM_020013	Fgf21					fibroblast growth factor 21	0	0	0	0	0	0	0	0	0	0	0	0	0	0	0	0	0	0	0	0	0	0	1	1	0	2	0.190767	-0.110267	-0.346833	-0.118433	0.00866667	-0.115067	0.0038	-0.161167	-0.234933	-0.1652	-0.191733	-	-
	2	4267	FGF	NM_026218	Fgfr1op2					FGFR1 oncogene partner 2	1	0	0	0	0	0	0	0	0	1	1	0	3	1	0	1	0	0	0	0	0	0	0	0	0	2	0.381533	-1.33527	0.2307	-0.789367	-0.8015	-1.02917	-0.609067	0.7268	0.418667	-0.917367	-0.675733	-	neg
x	2	4295	FGF	NM_008011	Fgfr4					fibroblast growth factor receptor 4	0	0	0	0	0	0	0	0	0	0	1	0	1	0	0	0	0	0	0	0	0	0	0	1	0	1	0.221933	0.1405	-0.182033	0.0815333	-3.33333e-05	0.0032	-0.0732333	-0.313833	-0.3722	0.0884333	-0.1771	-	-
x	2	7781		NM_031166	Id4					inhibitor of DNA binding 4	0	0	0	0	0	0	0	0	0	0	1	0	1	1	0	0	0	0	0	0	1	0	0	0	0	2	-0.660167	-0.2569	1.19093	0.383467	1.6922	1.62887	0.696333	1.95307	1.09043	1.65723	2.73057	neg	-
x	2	7842	IGF	NM_010513	Igf1r		Igf1r	YES		insulin-like growth factor I receptor	0	0	0	0	1	0	0	0	0	0	1	0	2	0	0	0	0	0	0	0	0	1	0	0	0	1	-2.38437	-0.470733	-1.7784	-0.3653	-0.258833	0.1101	0.312367	0.586567	0.303267	-0.593733	0.0357667	neg	-
	2	7831	IGF	NM_023670	Igf2bp3		Igf2bp3	YES		insulin-like growth factor 2 binding protein 3	0	0	0	0	0	0	0	0	1	0	0	0	1	1	0	0	0	0	0	0	0	1	0	0	0	2	0.529233	-1.2767	-0.4372	-3.6766	-2.13847	-1.9165	-0.651367	-0.2822	-0.487267	-1.8138	-2.07727	pos	neg
	2	7838	IGF	NM_010518	Igfbp5		Igfbp5	YES		insulin-like growth factor binding protein 5	0	0	0	0	0	0	0	0	0	0	0	0	0	1	0	0	0	0	0	0	0	0	1	1	0	3	-2.95953	0.0235667	-1.63087	0.2607	2.61463	3.09583	0.310067	0.0848	2.63657	4.4772	1.38627	neg	-
	2	5356	transcription factor	NM_144955	Nkx6-1		Nkx6-1	YES		homeodomain transcription factor Nkx6.1	0	0	0	0	0	0	0	0	0	0	1	0	1	0	0	0	0	0	0	0	0	0	1	0	0	1	0.0215	0.195967	-0.1689	1.3488	0.1547	0.0265	0.0382667	-0.104567	-0.2384	0.1504	0.155233	-	-
	2	12370	PDGF	NM_026840	Pdgfrl		Pdgfrl	YES		platelet-derived growth factor receptor-like	0	0	0	0	0	0	0	0	1	0	0	0	1	0	0	0	0	0	0	0	0	1	0	0	0	1	-0.3631	-0.0883667	-0.437533	-0.153967	0.808733	-0.0109	0.0557	0.4383	0.9041	2.03403	1.36627	-	-
x	2	14846	transcription factor	NM_011438	Sox12					SRY-box containing gene 12	0	0	0	0	0	0	0	0	0	1	0	0	1	0	1	0	0	0	0	0	0	1	0	0	0	2	0.0911	-0.643033	0.101167	-0.481067	-0.3425	0.793967	0.3599	0.133467	-0.4986	-0.2865	-0.0905667	-	neg
x	2	1046	transcription factor	NM_011443	Sox2				Sry related HMG box transcription factor, "maintains stemness"	Adult retina cDNA RIKEN full-length enriched library clone:A930101E03 product:SRY-box containing gene 2 full insert sequence. (Fragment).	0	0	0	0	0	0	0	0	0	1	0	0	1	0	0	0	0	0	0	0	0	0	0	1	0	1	-0.629867	-1.02737	-0.577533	-1.90517	-0.0327667	-0.301333	0.3772	0.264833	0.391667	0.0629333	0.407867	neg	neg
x	2	14841	transcription factor	NM_009238	Sox4					SRY (sex determining region Y)-box 4	0	0	0	1	0	0	0	0	0	1	0	0	2	1	0	0	0	0	0	0	0	0	1	0	0	2	-0.170233	-0.327633	0.309333	-0.6245	0.384033	0.429433	0.821533	0.972667	0.180267	-0.0731	0.6644	-	-
	2	15565	transcription factor	NM_011545	Tcf21		Tcf21	YES		transcription factor 21	0	0	0	0	0	0	0	0	0	1	0	0	1	0	0	0	0	0	0	0	1	0	0	0	0	1	0.00963333	0.344933	-0.0850333	0.500967	0.1795	-0.0632333	0.2209	-0.0228667	0.0622667	0.0123	-0.0677333	-	-
	2	1043	receptor other	NM_198107	Thrap5		Thrap5	YES		Adult retina cDNA RIKEN full-length enriched library clone:A930033B11 product:thyroid hormone receptor associated protein 5 full insert sequence.	0	0	0	0	0	0	0	0	1	0	0	0	1	1	0	0	0	0	0	0	0	0	1	0	0	2	1.00157	0.2405	0.632967	-1.9492	-0.609833	0.4208	0.583233	-0.451167	-1.16033	0.261667	0.100667	pos	-
	1	760		NM_011789	Apc2		Apc2	YES		adenomatosis polyposis coli 2	0	0	0	0	0	0	0	0	0	0	0	0	0	0	0	0	0	0	0	0	0	0	1	0	0	1	0.475967	-0.909233	0.668333	-0.9861	-0.662467	0.665867	0.393967	-0.310733	-1.24933	-0.0682667	-0.438133	-	neg
x	1	1894	BMP	NM_009758	Bmpr1a					bone morphogenetic protein receptor type 1A	0	0	0	0	0	0	0	0	0	0	0	0	0	0	0	0	0	0	0	0	1	0	0	0	0	1	0.0293333	-1.84273	-0.0691	-3.24077	-0.7401	-0.969067	-0.748867	0.512733	1.11957	-0.0982333	0.191267	-	neg
x	1	1896	BMP	NM_007561	Bmpr2		Bmpr2	YES		bone morphogenic protein receptor type II	0	0	0	0	0	0	0	0	0	1	0	0	1	0	0	0	0	0	0	0	0	0	0	0	0	0	0.231567	-2.36033	0.0746333	-2.42597	-1.5915	-0.478867	-0.9055	-0.300967	-0.601967	0.0538	-0.629367	-	neg
	1	3038	cell cycle	NM_009872	Cdk5r2		Cdk5r2	YES		cyclin-dependent kinase 5 regulatory subunit 2	0	0	0	0	0	1	1	0	0	1	0	0	3	0	0	0	0	0	0	0	0	0	0	0	0	0	0.258633	-0.1291	0.0283333	0.0108	-0.2112	0.3327	0.0764667	-0.233967	-1.02403	0.083	-0.424	-	-
	1	2390	cell cycle	NM_145990	Cdk5rap2	NM_145990	Cdk5rap2	YES		CDK5 regulatory subunit associated protein 2	0	0	0	0	0	0	0	0	0	0	0	0	0	1	0	0	0	0	0	0	1	0	0	0	1	3	0.5546	-0.74	-0.0856667	-2.1251	-1.0365	-1.1543	-0.319233	-0.721833	-0.2254	0.187833	0.2727	pos	neg
	1	2388	cell cycle	NM_144536	Cdkal1	NM_144536	Cdkal1	YES		CDK5 regulatory subunit associated protein	0	0	0	0	0	0	0	0	1	0	0	0	1	0	0	0	1	1	0	1	0	0	0	0	0	3	-0.371933	-0.907133	-0.819	-2.2733	-1.29937	-0.363567	0.1309	-0.531433	-0.410733	-0.159133	-0.711233	-	neg
	1	3049	cell cycle	NM_183294	Cdkl1					cyclin-dependent kinase-like 1 (CDC2-related	0	0	0	0	0	0	0	0	0	0	0	0	0	1	0	0	0	0	0	0	1	0	0	0	0	2	0.0372	0.204067	-0.0792667	0.244733	0.139433	-0.0319	0.0219	-0.00206667	-0.124433	-0.0563	0.100067	-	-
	1	3045	cell cycle	NM_009877	Cdkn2a		Cdkn2a	YES	p16INK4a	cyclin-dependent kinase inhibitor 2A	0	0	0	0	0	0	0	0	0	0	0	0	0	0	0	0	0	0	0	0	0	1	0	0	0	1	0.486333	0.0473667	-0.0177	0.261767	-0.0224	-0.267167	-0.0814	-0.0657	-0.236067	-0.106367	0.00243333	-	-
	1	4279	FGF	NM_008002	Fgf10					fibroblast growth factor 10	0	0	0	0	0	0	0	0	0	0	0	0	0	0	0	0	0	0	0	0	1	0	0	0	0	1	0.1904	0.123333	0.278167	0.394067	0.239633	0.0761	0.237633	0.132233	0.0845333	-0.0253667	0.1639	-	-
	1	4264	FGF	NM_010198	Fgf11		Fgf11	YES		Fgf11 protein.	0	0	0	0	0	0	0	0	0	0	0	0	0	0	0	0	0	0	0	0	0	0	1	0	0	1	-3.05307	-1.29053	-2.74073	-0.1754	-0.8187	1.03713	0.0664667	0.0340667	-1.25547	-0.261567	-1.3972	neg	neg
	1	4265	FGF	NM_010199	Fgf12	NM_010199		YES		Fgf12	1	0	0	0	0	0	0	0	0	0	0	0	1	1	0	1	0	0	0	0	1	0	0	0	0	3	0.337033	-1.3389	1.1561	0.253833	-0.545367	1.22203	-0.734067	1.53747	0.8132	0.0335333	-0.251767	-	neg
	1	4293	FGF	NM_008009	Fgfbp1		Fgfbp1	YES		fibroblast growth factor binding protein 1	0	0	0	0	0	0	0	0	0	0	0	0	0	0	0	0	0	0	0	0	1	0	0	0	0	1	-0.238133	0.428667	-0.188533	0.773	0.5443	0.0272333	0.154833	0.0942333	0.387667	0.0457333	0.1302	-	-
x	1	1693	FGF	NM_010206	Fgfr1		Fgfr1	YES		Basic fibroblast growth factor receptor 1 precursor (EC 2.7.1.112) (FGFR-1) (bFGF-R) (MFR).	0	0	0	0	0	0	0	0	0	1	0	0	1	0	0	0	0	0	0	0	0	0	0	0	0	0	0.3962	-0.580267	-0.1486	-2.4211	-0.344933	-0.434233	-0.0788333	-0.7823	-0.144167	0.9947	-0.0867	-	neg
	1	4268	FGF	NM_201230	Fgfr1op					Fgfr1op protein.	0	0	0	0	0	0	0	0	1	0	0	0	1	0	0	0	0	0	0	0	0	0	0	0	0	0	0.307767	-1.8826	-0.113867	-2.4431	-1.6203	-1.10487	-1.07903	-0.3847	-0.6207	-1.2828	-1.3872	-	neg
x	1	5065	Notch	NM_008236	Hes2		Hes2	YES		hairy and enhancer of split 2	0	0	0	0	0	0	0	0	0	0	1	0	1	0	0	0	0	0	0	0	0	0	0	0	0	0	-0.3258	0.5446	-0.4487	1.2087	0.452233	0.0898333	0.0830333	-0.1769	0.2213	0.0194333	0.1502	-	pos
	1	7830	IGF	NM_009951	Igf2bp1		Igf2bp1	YES		insulin-like growth factor 2 binding protein 1	0	0	0	0	0	0	0	0	0	0	1	0	1	1	0	0	0	0	0	0	0	0	0	0	0	1	0.2657	-0.198867	-0.890933	-0.566033	-1.5725	-2.10853	-1.00617	-1.47407	-2.53437	-2.61097	-1.96047	-	-
	1	7834	IGF	NM_008341	Igfbp1					insulin-like growth factor binding protein 1	0	0	0	0	0	0	0	0	0	0	0	0	0	0	0	0	0	0	0	0	0	0	1	0	0	1	-0.0385	0.319567	-0.0725333	1.20903	0.195267	0.264833	0.167833	-0.0534667	0.0943	0.188133	0.167433	-	-
	1	7836	IGF	NM_008343	Igfbp3					insulin-like growth factor binding protein 3	0	0	0	0	0	0	0	0	1	0	0	0	1	1	0	0	0	0	0	1	0	0	0	0	0	2	1.23317	-0.6199	-0.172767	-4.01773	-2.2111	-2.5195	-1.65617	-2.92483	-0.789933	-0.317833	-1.24317	pos	neg
	1	308	growth factor other	NM_008048	Igfbp7	NM_008048	Igfbp7	YES		2 days neonate sympathetic ganglion cDNA RIKEN full-length enriched library clone:7120442H03 product:insulin-like growth factor binding protein 7 full insert sequence.	0	0	0	0	0	0	0	0	0	0	0	0	0	0	0	0	0	0	0	0	1	0	0	0	1	2	-0.540633	0.553933	-0.148667	0.819333	1.51063	0.184633	0.240267	0.498433	1.82363	2.66663	2.0867	neg	pos
	1	7841	IGF	NM_018741	Igfbpl1		Igfbpl1	YES		insulin-like growth factor binding protein-like	0	0	0	0	0	1	0	0	0	0	0	0	1	0	0	0	1	0	0	1	0	1	0	0	0	3	0.559933	-0.3138	0.578567	-0.480133	0.163433	0.408333	-0.346433	0.273533	-0.2126	0.683867	0.0890333	pos	-
x	1	9257	transcription factor	NM_001025251	Mbp	NM_001025251		YES		myelin basic protein isoform 1	0	0	0	0	0	0	0	0	0	1	0	0	1	0	0	0	0	0	0	0	0	0	0	0	0	0	-1.40087	1.24447	4.1035	1.1519	4.43973	4.74187	0.442867	1.18907	4.82203	5.16327	2.5276	neg	pos
x	1	9255	transcription factor	NM_008665	Myt1	NM_008665	Myt1	YES		myelin transcription factor 1	1	0	1	0	0	0	0	0	0	0	1	0	3	0	0	0	0	0	0	0	0	0	0	0	0	0	0.984867	-1.06837	1.1317	-1.58847	0.308933	0.221133	0.801867	0.902567	0.457633	-0.438033	0.7866	pos	neg
	1	11168	transcription factor	NM_008699	Nkx2-3					NK2 transcription factor related locus 3	0	0	0	0	0	0	0	0	0	0	0	0	0	0	0	0	0	0	0	0	0	0	1	0	0	1	0.118467	0.731733	-0.225433	2.85077	0.9334	-0.216067	0.0182667	0.0602667	-0.1777	-0.1447	0.247433	-	pos
	1	967	transcription factor	NM_023504	Nkx2-4					Adult male testis cDNA RIKEN full-length enriched library clone:1700001P03 product:similar to HOMEOBOX TRANSCRIPTION FACTOR.	0	0	0	0	0	0	0	0	1	0	0	0	1	0	0	0	0	0	0	0	0	0	0	0	0	0	0.410667	-0.220967	0.289867	1.01323	0.129967	0.1719	-0.2753	-0.0088	-0.5051	0.0446333	0.0828	-	-
x	1	11784	transcription factor	NM_016967	Olig2		Olig2	YES		oligodendrocyte transcription factor 2	0	1	0	0	0	0	0	0	0	0	0	0	1	0	0	0	0	0	0	0	0	0	1	0	0	1	1.7037	-0.516967	0.8769	-3.24307	-1.3328	-1.6393	0.335133	-0.393267	-1.03017	-1.74913	-0.678133	pos	neg
	1	11938		NM_008780	Pax1	NM_008780		YES		paired box gene 1	0	0	0	0	0	0	0	0	0	0	0	0	0	0	0	0	0	0	0	0	0	0	1	0	0	1	0.0584667	0.286167	-0.1855	0.711633	0.3153	0.0649	0.00486667	0.0929667	-0.100233	-0.0250667	0.1124	-	-
x	1	10628		NM_008782	Pax5	NM_008782	Pax5	YES		n/a	0	0	0	0	0	0	0	0	0	0	0	0	0	0	0	0	0	0	0	0	1	0	0	0	1	2	-0.185033	0.3593	-0.394467	0.941933	0.550667	0.1584	0.2918	-0.0729	0.1573	0.0422	0.164667	-	-
	1	11942		NM_011039	Pax7		Pax7	YES		paired box gene 7	0	0	0	0	0	0	0	0	0	0	1	0	1	0	0	0	0	0	0	0	0	0	0	0	0	0	-0.0758667	0.2015	-0.340567	0.517733	0.207467	0.1451	0.0521	-0.0208333	0.168467	-0.0888333	0.107667	-	-
	1	1772	receptor other	NM_008809	Pdgfrb		Pdgfrb	YES		Beta platelet-derived growth factor receptor precursor (EC 2.7.1.112) (PDGF-R-beta).	0	0	0	0	0	0	0	0	0	0	1	0	1	0	0	0	0	0	0	0	0	0	0	0	0	0	-0.0755	-0.156233	2.33507	0.287033	1.84053	2.57837	1.6753	1.99883	0.516233	1.91447	1.1414	-	-
	1	12333		NM_028477	Plpcd					placental prolactin-like protein C delta	0	0	0	0	0	0	0	0	0	0	0	1	1	0	0	0	0	0	1	0	1	0	0	0	0	2	-0.0284667	0.3722	0.225867	1.23367	0.2179	0.0175	-0.0154	0.331133	0.356633	0.2393	0.170833	-	-
	1	12717		NM_025896	Plpi					prolactin-like protein I	0	0	0	0	0	0	0	0	0	0	0	0	0	0	0	0	0	0	0	0	1	0	0	0	0	1	0.1184	0.7606	0.637667	3.177	0.802767	0.0144667	0.194867	0.4336	0.8691	0.392433	1.0503	-	pos
x	1	15589	transcription factor	NM_009237	Sox3					Transcription factor SOX-3.	0	0	0	0	0	0	0	0	0	0	1	0	1	0	0	0	0	0	0	0	0	0	0	0	0	0	0.3909	-0.718	0.1479	-1.86323	-1.1569	-0.929533	0.401533	-0.756633	-1.44027	-0.763167	-0.9386	-	neg
x	1	14847	transcription factor	NM_173384	Sox30					SRY-box containing gene 30	0	0	0	1	0	0	0	0	0	0	0	0	1	1	0	0	0	0	0	0	1	0	0	0	0	2	-0.145467	0.3168	-0.0152	0.5733	0.177533	0.0252	0.111033	0.0130333	0.0173333	0.0617667	0.3223	-	-
	1	15561	transcription factor	NM_011544	Tcf12		Tcf12	YES		transcription factor 12	0	0	0	0	0	0	0	0	1	0	0	0	1	0	0	0	0	0	0	0	0	0	0	0	0	0	0.674533	-1.67747	0.0242	-3.9388	-1.0183	-0.441567	-0.0253333	-0.256967	0.0853667	-0.152433	-0.6106	pos	neg
	1	15563	transcription factor	NM_009330	Tcf2					transcription factor 2	0	0	0	0	0	0	0	0	0	0	0	0	0	0	0	0	0	0	0	0	0	0	1	0	0	1	-0.426233	1.1281	-0.270333	2.19073	0.8446	0.2623	0.3699	0.1826	0.467267	0.260933	0.388767	-	pos
x	1	15568	transcription factor	NM_013685	Tcf4		Tcf4	YES		Transcription factor 4 (Immunoglobulin transcription factor 2) (ITF-2) (MITF-2) (SL3-3 enhancer factor 2) (SEF-2) (Class A helix-loop-helix transcription factor ME2).	0	0	0	0	0	0	0	0	0	0	0	0	0	0	0	0	0	0	0	0	1	0	0	0	0	1	0.4466	-1.23983	0.769433	-1.58727	-0.524833	-0.00433333	-0.486667	0.7864	0.235567	-0.795233	-0.2714	-	neg
	1	15423	receptor other	NM_172424	Thrap2		Thrap2	YES		thyroid hormone receptor associated protein 2	0	0	0	0	0	0	0	0	0	0	0	0	0	0	0	0	0	0	0	0	0	0	1	0	0	1	0.323833	-1.44107	0.526133	-1.9208	-0.811533	0.9318	0.213733	-0.337967	-0.831633	0.726533	0.117667	-	neg
	1	15424	receptor other	NM_146153	Thrap3					thyroid hormone receptor associated protein 3	0	0	0	0	0	0	0	0	0	0	0	0	0	0	0	0	0	0	0	0	0	0	0	1	0	1	1.21567	-0.722867	0.882	-1.69283	-0.332833	0.167333	0.1999	-0.817333	-0.572267	0.0900333	-0.0593333	pos	neg
x	0	759		NM_007462	Apc		Apc	YES		adenomatosis polyposis coli	0	0	0	0	0	0	0	0	0	0	0	0	0	0	0	0	0	1	1	0	0	0	0	0	0	2	1.5147	-2.85113	1.23907	-2.95367	-1.67263	0.1518	-1.27883	-0.712833	-0.617233	-0.4823	-0.991767	pos	neg
	0	14162		NM_011318	Apcs					serum amyloid P-component	0	0	0	0	0	0	0	0	0	0	0	0	0	0	0	0	0	0	0	0	0	0	0	0	0	0	-0.6532	1.71887	-0.2668	2.9111	1.6737	0.0954	0.554133	0.648767	0.8769	0.448167	0.9833	neg	pos
	0	1884	BMP	NM_009755	Bmp1		Bmp1	YES		bone morphogenetic protein 1	0	0	0	0	0	0	1	0	0	0	0	0	1	0	0	0	0	0	0	0	0	0	0	0	0	0	0.125133	0.6133	-0.168167	-3.2813	0.576933	0.415567	0.828333	-0.573367	0.6695	1.61197	0.408533	-	pos
	0	9353	BMP	NM_009756	Bmp10					n/a	0	0	0	0	0	0	0	0	0	0	0	0	0	0	0	0	0	0	0	0	0	0	0	0	0	0	-0.3409	1.01667	-0.3113	2.26483	0.680933	0.0282	0.417233	0.217933	0.515833	0.309667	0.572867	-	pos
	0	1885	BMP	NM_009757	Bmp15					bone morphogenetic protein 15	0	0	0	0	0	1	0	0	0	0	0	0	1	0	0	0	0	0	0	0	0	0	0	0	0	0	0.194233	0.180733	0.1375	0.389633	0.0821333	0.0293333	0.0782667	0.1137	0.199633	0.0299	0.376	-	-
	0	1886	BMP	NM_007553	Bmp2					bone morphogenetic protein 2	0	0	0	1	0	0	0	0	0	0	0	0	1	0	0	0	0	0	1	0	0	0	0	0	0	1	0.0791667	0.243033	0.0029	0.980033	0.383033	0.0218333	-0.2165	0.0765333	0.302267	0.314633	0.422133	-	-
	0	1843	BMP	NM_080708	Bmp2k		Bmp2k	YES		BMP2 inducible kinase	0	0	0	0	0	0	0	0	0	0	0	0	0	0	0	0	0	0	0	0	0	0	0	0	0	0	0.7375	-0.6789	0.551033	-0.3681	-0.313933	-0.0567	-0.259467	-0.276667	-0.1722	0.670267	0.5435	pos	neg
	0	1887	BMP	NM_173404	Bmp3		Bmp3	YES		bone morphogenetic protein 3	0	0	0	0	0	0	0	0	0	0	0	0	0	0	0	0	0	0	0	0	0	0	0	0	0	0	-0.0959667	-0.0658667	-0.0123	0.917733	-0.0639333	0.164367	0.0648333	-0.0311	-0.373167	0.0989	0.00126667	-	-
	0	1888	BMP	NM_007554	Bmp4					Bone morphogenetic protein 4 precursor (BMP-4) (BMP-2B).	0	0	0	0	0	0	0	0	0	0	0	0	0	0	0	0	0	0	0	0	0	0	0	0	0	0	-2.35627	-0.213933	-1.65403	0.943633	-0.2178	0.9092	0.227633	0.915733	-0.208767	-0.1639	-0.202433	neg	-
	0	1890	BMP	NM_007556	Bmp6		Bmp6	YES		bone morphogenetic protein 6	0	0	0	0	0	0	0	0	0	0	0	0	0	0	0	0	0	0	0	0	0	0	0	0	0	0	-0.374233	0.535	0.915733	2.06	2.01267	1.47447	0.747967	0.799133	1.00113	4.44813	1.87707	-	pos
	0	1891	BMP	NM_007557	Bmp7		Bmp7	YES		bone morphogenetic protein 7	0	0	0	0	0	0	0	0	0	0	0	0	0	0	0	0	0	0	0	0	0	0	0	0	0	0	-0.584633	-1.19037	-2.19403	-2.63147	-2.38517	-2.47333	-0.4314	-1.7247	-1.92537	-2.01377	-2.96023	neg	neg
	0	1892	BMP	NM_007558	Bmp8a		Bmp8a	YES		Bone morphogenetic protein 8A precursor (BMP-8A) (Osteogenic protein 2) (OP-2).	0	0	0	0	0	0	0	0	0	0	0	0	0	0	0	0	0	0	0	0	0	0	0	0	0	0	-0.0950667	0.0334667	-0.420233	0.158167	-0.205667	-0.236633	-0.00656667	-0.1498	-0.195433	-0.272933	-0.242733	-	-
	0	1893	BMP	NM_007559	Bmp8b					bone morphogenetic protein 8b	0	0	0	0	0	0	0	0	0	0	0	0	0	0	0	0	0	0	0	0	0	0	0	0	0	0	-0.0976333	0.0328	-0.0675333	0.250133	0.146933	0.00496667	-0.0267333	-0.0506333	0.0005	-0.0977333	-0.1143	-	-
	0	2931		NM_028472	Bmper		Bmper	YES		crossveinless 2	0	0	0	1	0	0	0	0	0	0	0	0	1	0	0	0	0	1	0	0	0	0	0	0	0	1	0.0380667	-0.175567	0.0895667	-1.67203	-0.219633	0.0505333	0.302367	0.529	1.2256	-0.0844667	-0.875233	-	-
x	0	1895	BMP	NM_007560	Bmpr1b		Bmpr1b	YES		bone morphogenetic protein receptor type 1B	0	0	0	0	0	0	0	0	0	0	0	0	0	0	0	0	0	0	0	0	0	0	0	0	0	0	-0.251067	-1.62433	0.341133	-1.93913	0.0512667	-0.5133	-0.2622	1.41227	1.65913	-0.350167	0.422433	-	neg
	0	10345		NM_194444	Cdk10		Cdk10	YES		n/a	0	0	0	0	0	0	0	0	0	0	0	0	0	0	0	0	0	0	0	0	0	0	0	0	0	0	0.9283	0.623733	0.875833	-0.6544	-0.0571	0.252033	0.150967	-0.499867	-1.0294	0.358233	0.130733	pos	pos
	0	2387	cell cycle	NM_013812	Cdk2ap1					CDK2 (cyclin-dependent kinase 2)-associated	0	0	0	0	1	0	0	0	0	0	0	0	1	0	0	0	0	0	0	0	0	0	0	0	0	0	1.18087	-0.111033	0.984267	-1.67557	-0.7893	-0.849433	-0.1203	-0.7413	-1.044	-1.22647	-0.207667	pos	-
	0	3036	cell cycle	NM_027165	Cdk3		Cdk3	YES		cyclin-dependent kinase 3	0	0	0	0	0	0	0	0	0	0	0	0	0	0	0	0	0	0	0	0	0	0	0	0	0	0	0.254933	-0.0232	-0.0853	0.185133	-0.307067	-0.111867	-0.113	-0.3131	-0.5528	-0.2692	-0.513967	-	-
	0	3051	cell cycle	NM_007668	Cdk5		Cdk5	YES		cyclin-dependent kinase 5	0	0	0	0	0	0	0	0	0	0	0	0	0	0	0	0	0	0	0	0	0	0	0	0	0	0	0.6709	-0.215767	1.15137	-0.906967	0.1759	0.795533	0.176	-0.0064	-0.5876	0.6405	0.110233	pos	-
	0	2389		NM_025876	Cdk5rap1					CDK5 regulatory subunit associated protein 1	0	0	0	0	0	0	0	0	0	0	0	0	0	0	0	0	0	0	0	0	0	0	0	0	0	0	0.1846	-0.514133	-0.0811667	-1.41643	-0.8563	-0.0259333	-0.168033	-0.258067	-0.5981	-0.188	-0.704167	-	neg
x	0	3039	cell cycle	NM_009873	Cdk6					cyclin-dependent kinase 6	0	0	0	0	0	0	0	0	0	0	0	0	0	0	0	0	0	0	0	0	0	0	0	0	0	0	0.3549	-0.290867	0.2423	0.168433	-0.5769	-0.0763667	0.0398667	0.150167	-0.659633	-0.387667	-0.525767	-	-
	0	2460	DNA repair	NM_009874	Cdk7					Cell division protein kinase 7 (EC 2.7.1.37) (CDK-activating kinase) (CAK) (TFIIH basal transcription factor complex kinase subunit) (39 kDa protein kinase) (P39 Mo15) (Protein-tyrosine kinase MPK-7) (CR4 protein	0	0	0	0	0	0	0	0	0	0	0	0	0	0	0	1	0	0	0	0	0	0	0	0	0	1	0.414133	-1.192	0.2948	-1.54883	-1.01953	-0.487567	-0.569133	-0.394333	-0.645467	-0.371833	-0.799667	-	neg
	0	3040	cell cycle	NM_153599	Cdk8					cyclin-dependent kinase 8 isoform a	0	0	0	1	0	0	1	0	0	0	0	0	2	0	0	0	0	0	0	0	0	0	0	0	0	0	0.766333	-1.14013	0.158233	-1.86183	-1.2586	-0.846633	-0.690467	-0.325833	-0.6048	-1.18397	-1.0988	pos	neg
	0	3041	cell cycle	NM_130860	Cdk9		Cdk9	YES		cyclin-dependent kinase 9	0	0	0	0	0	0	0	0	0	0	0	0	0	0	0	0	0	0	0	0	0	0	0	0	0	0	0.685467	0.0856333	0.323667	-2.37507	-0.2775	-0.203433	0.0596	-0.455667	-0.9739	-0.0764667	-0.0044	pos	-
	0	3052	cell cycle	NM_177270	Cdkl2	NM_177270	Cdkl2	YES		cyclin-dependent kinase-like 2 (CDC2-related	0	0	0	0	0	0	0	0	0	0	0	0	0	0	0	0	0	0	0	0	0	0	0	0	0	0	0.124033	-0.373033	0.846733	-0.0977333	-0.0735333	1.08263	-0.5324	0.3644	-0.309467	0.246367	-0.3674	-	-
	0	3042	cell cycle	NM_007669	Cdkn1a				p21	cyclin-dependent kinase inhibitor 1A (P21)	0	0	0	0	0	0	0	0	0	0	0	0	0	0	0	0	0	0	0	0	0	0	0	0	0	0	-1.9744	0.640567	-2.751	-2.28517	-1.0227	-1.0164	-0.9999	-1.9459	-1.04067	0.1726	-1.33183	neg	pos
	0	3043	cell cycle	NM_009875	Cdkn1b		Cdkn1b	YES		cyclin-dependent kinase inhibitor 1B (P27)	0	0	0	1	0	0	0	0	0	0	0	0	1	0	0	0	0	0	0	0	0	0	0	0	0	0	0.523	-0.896067	0.311567	-0.5889	-0.78	0.202633	-0.4752	-0.210533	-0.687867	-0.406	-0.458267	pos	neg
	0	3044	cell cycle	NM_009876	Cdkn1c					Cyclin-dependent kinase inhibitor 1C (Cyclin-dependent kinase inhibitor p57) (p57KIP2).	0	0	0	0	0	0	0	0	0	0	0	0	0	0	0	0	0	0	0	0	0	0	0	0	0	0	-2.52313	0.829867	-2.62947	0.4658	0.7736	0.0903667	1.4147	1.53907	-0.2536	-0.762933	-0.807767	neg	pos
	0	3046	cell cycle	NM_007670	Cdkn2b		Cdkn2b	YES		cyclin-dependent kinase inhibitor 2B (p15	0	0	0	0	0	0	0	0	0	0	0	0	0	0	0	0	0	0	0	0	0	0	0	0	0	0	-0.393233	-0.142733	-0.758567	-0.470133	0.617333	-0.277533	-0.0300333	-0.0671667	1.4876	1.7555	1.83193	-	-
	0	3048	cell cycle	NM_009878	Cdkn2d					cyclin-dependent kinase inhibitor 2D (p19	0	0	0	0	0	0	0	0	0	0	0	0	0	0	0	0	0	0	0	0	0	0	0	0	0	0	-0.134233	-0.3402	-0.464167	-1.4105	-1.0244	-0.279067	-0.411733	-0.709867	-1.39213	-0.581567	-0.849633	-	-
	0	3592		NM_026373	Cdk2ap2		Cdk2ap2	YES		DOC-1 related protein	0	0	0	0	0	0	0	0	0	0	0	0	0	1	0	0	0	0	0	0	0	0	0	0	0	1	0.1912	0.274233	0.186767	-1.35673	-0.4856	-0.505733	0.0984667	-0.461633	-1.04943	-0.154667	-0.0926333	-	-
	0	2391	cell cycle	NM_030248	Cdk5rap3		Cdk5rap3	YES		CDK5 regulatory subunit associated protein 3	0	0	0	0	0	0	0	0	0	0	0	0	0	0	1	0	0	0	0	0	0	0	0	0	0	1	0.0176667	0.665133	-0.1858	-1.6981	0.3086	0.304433	0.382533	-0.276933	-0.3457	1.0114	0.00403333	-	pos
	0	9372	FGF	NM_008007	Fgf3		Fgf3	YES		n/a	0	0	0	0	0	0	0	0	0	0	0	0	0	0	1	0	0	0	0	0	0	0	0	0	0	1	-0.134467	0.0305333	-0.368033	0.0629333	-0.0845	0.0834667	-0.200167	-0.2907	-0.518767	-0.202767	-0.3665	-	-
	0	4278	FGF	NM_010197	Fgf1	NM_010197		YES		fibroblast growth factor 1	0	0	0	0	0	0	0	0	0	0	0	0	0	0	0	0	0	0	0	0	0	0	0	0	0	0	-0.503833	-1.3334	0.538667	-1.1662	0.225033	1.43253	0.0387333	1.25553	0.8593	0.9982	0.700133	neg	neg
	0	4280	FGF	NM_183064	Fgf12	NM_183064		YES		fibroblast growth factor 12 isoform a	0	0	0	0	0	0	0	0	0	0	0	0	0	0	0	0	0	0	0	0	0	0	0	0	0	0	0.376067	-1.44043	1.1044	0.0788	-0.564133	1.0773	-0.720867	1.53953	0.796567	0.04	-0.436067	-	neg
	0	4281	FGF	NM_010200	Fgf13					fibroblast growth factor 13	0	0	0	0	0	0	0	0	0	0	0	0	0	0	0	0	0	0	0	0	0	0	0	0	0	0	-0.3598	0.1053	0.5128	1.53037	0.358267	1.65377	0.280233	0.6523	-0.1961	-0.410333	-0.483667	-	-
	0	4282	FGF	NM_207667	Fgf14	NM_207667	Fgf14	YES		fibroblast growth factor 14 isoform b	0	0	0	0	1	0	0	0	0	0	0	0	1	0	0	0	0	1	0	0	0	0	0	0	0	1	0.0317667	-0.6903	0.1729	-0.2906	-0.610767	0.142367	-0.6252	-0.0376	-0.564367	-0.480667	-0.1941	-	neg
	0	4266	FGF	NM_010201	Fgf14	NM_010201	Fgf14	YES		Fgf14	1	0	0	0	0	0	0	0	0	0	0	0	1	0	0	0	0	0	0	0	0	0	0	0	0	0	-0.166667	-0.833267	-0.0652667	0.0215	-0.651033	0.881133	-0.482933	-0.0543	-0.796967	-0.169367	-0.4731	-	neg
	0	10436		NM_030614	Fgf16					n/a	0	0	0	0	0	0	0	0	0	0	0	0	0	0	0	0	0	0	0	0	0	0	0	0	0	0	-0.6028	0.973067	-0.6227	1.81047	0.694867	0.313467	0.224533	0.0892	0.369567	0.375333	0.301867	neg	pos
	0	4284	FGF	NM_008004	Fgf17		Fgf17	YES	dorsal	fibroblast growth factor 17	0	0	0	0	0	0	0	0	0	0	0	0	0	0	0	0	0	0	0	0	0	0	0	0	0	0	-0.0221	0.0217667	0.0362333	0.132333	0.0634	-0.101833	-0.168333	-0.0772333	-0.206367	-0.0493667	-0.1099	-	-
	0	4285	FGF	NM_008005	Fgf18				dorsal	fibroblast growth factor 18	0	0	0	0	0	0	0	0	0	0	0	0	0	0	0	0	0	0	0	0	0	0	0	0	0	0	-0.2372	0.259467	-0.1737	0.165433	0.578567	0.5928	0.00706667	-0.0703	-0.235267	1.51273	-0.271867	-	-
	0	9371	FGF	NM_008006	Fgf2		Fgf2	YES		n/a	0	0	0	0	0	0	0	0	0	0	0	0	0	0	0	0	0	0	0	0	0	0	0	0	0	0	0.0521667	-0.3203	-0.1612	0.1406	0.00626667	-0.0659	-0.153967	-0.157067	-0.3472	0.7813	-0.124	-	-
	0	4286	FGF	NM_030610	Fgf20	NM_030610		YES		Fibroblast growth factor 20 (FGF-20).	0	0	0	0	0	0	0	0	0	0	0	0	0	0	0	0	0	0	0	0	0	0	0	0	0	0	0.235	0.1356	0.3039	0.395667	0.2189	-0.0419333	0.118867	0.0849333	0.0459667	-0.2302	0.118267	-	-
	0	10437		NM_023304	Fgf22		Fgf22	YES		n/a	0	0	0	0	0	0	0	0	0	0	0	0	0	0	0	0	0	0	0	0	0	0	0	0	0	0	0.2627	-0.115	0.0239	-0.293267	-0.2476	-0.2108	-0.0968667	-0.265967	-0.592067	-0.1937	-0.154333	-	-
	0	4287	FGF	NM_022657	Fgf23					fibroblast growth factor 23	0	0	0	0	0	0	0	0	0	0	0	0	0	0	0	0	0	0	0	0	0	0	0	0	0	0	-0.0918333	0.3185	-0.425833	1.0087	0.297467	0.0441	0.2266	0.0252	0.0171333	-0.0989	0.109933	-	-
	0	4288	FGF	NM_010202	Fgf4		Fgf4	YES		fibroblast growth factor 4	0	0	1	0	0	0	0	0	0	0	0	0	1	0	0	0	0	0	0	0	0	0	0	0	0	0	0.0200667	0.0641	-0.133167	0.146667	-0.0236	-0.00516667	0.0192	-0.172	0.0537333	-0.268633	0.0767	-	-
	0	4289	FGF	NM_010203	Fgf5					fibroblast growth factor 5	0	0	0	0	0	0	0	0	0	0	0	0	0	0	0	0	0	0	0	0	0	0	0	0	0	0	0.394867	-0.00113333	0.301967	0.257667	0.0272333	0.0152333	-0.114233	0.1156	-0.042	-0.168067	0.199967	-	-
	0	4290	FGF	NM_008008	Fgf7				dorsal	fibroblast growth factor 7	0	0	0	0	0	0	0	0	0	0	0	0	0	0	0	0	0	0	0	0	0	0	0	0	0	0	0.0367	-0.128533	0.513367	0.281267	0.1986	0.252933	-0.278833	0.0433	0.262467	0.3945	-0.0167333	-	-
	0	4291	FGF	NM_010205	Fgf8				ventral	fibroblast growth factor 8	0	0	0	0	0	0	0	0	0	0	0	0	0	0	0	0	0	0	0	0	0	0	0	0	0	0	0.3831	-0.0975333	-0.00263333	0.333667	-0.0530333	-0.104533	-0.151067	-0.1129	-0.463167	-0.1071	-0.121533	-	-
x	0	4294	FGF	NM_008010	Fgfr3					Fibroblast growth factor receptor 3 precursor (EC 2.7.1.112) (FGFR-3) (Heparin-binding growth factor receptor).	0	0	0	0	0	0	0	0	0	0	0	0	0	0	0	0	0	0	0	0	0	0	0	0	0	0	0.199233	-1.35393	0.540667	-2.7705	-1.00933	-1.15353	-0.230233	0.153633	0.00296667	-0.3169	-0.159167	-	neg
	0	4298	FGF	NM_054071	Fgfrl1		Fgfrl1	YES		fibroblast growth factor receptor-like 1	0	0	0	0	0	0	0	0	0	0	0	0	0	0	0	0	0	0	0	0	0	0	0	0	0	0	0.529733	1.04373	-0.1589	-2.47183	0.296733	-1.30137	0.254	-0.742833	0.0810667	1.32677	-0.3046	pos	pos
	0	4292	FGF	NM_013518	Fgf9					fibroblast growth factor 9	0	0	0	0	0	0	0	0	0	0	0	0	0	1	0	0	0	0	0	0	0	0	0	0	0	1	-0.259167	0.00913333	0.0992	1.2199	0.0345	1.0571	-0.150867	0.1268	-0.537	-0.251	-0.117133	-	-
x	0	4300	FGF	NM_010207	Fgfr2		Fgfr2	YES		fibroblast growth factor receptor 2 isoform	0	0	0	0	0	0	0	0	0	0	0	0	0	1	0	0	0	0	0	0	0	0	0	0	0	1	0.382067	-0.584433	0.0470333	-0.532433	-0.175233	0.471667	-0.137133	-0.1691	-0.113167	0.211033	0.0007	-	neg
x	0	11219		NM_008079	Galc		Galc	YES		NOD-derived CD11c #NAME? dendritic cells cDNA RIKEN full-length enriched library clone:F630106A07 product:galactosylceramidase full insert sequence.	0	0	0	0	0	0	0	0	0	0	0	0	0	0	0	0	0	0	0	0	0	0	0	0	0	0	0.2125	-1.22113	0.0493667	-1.9484	-0.242467	-0.533333	0.0711333	0.1378	0.546833	0.0128667	0.1943	-	neg
x	0	7789		NM_008321	Id3					inhibitor of DNA binding 3	0	0	1	0	0	0	0	0	0	0	0	0	1	0	1	0	0	0	0	0	0	0	0	0	0	1	-0.465267	-0.265733	-0.8486	-0.0120667	-1.04627	-1.91193	-0.267333	-1.00963	-1.68047	-0.664767	1.53153	-	-
x	0	5068	Notch	NM_010419	Hes5		Hes5	YES		hairy and enhancer of split 5	0	0	0	1	0	0	0	0	0	0	0	0	1	0	0	0	0	0	0	0	0	0	0	0	0	0	-0.0975667	-0.0766667	0.290633	-0.258533	-0.3106	-0.2487	1.3886	1.15757	-0.144133	-1.85873	0.287567	-	-
x	0	5070	Notch	NM_033041	Hes7		Hes7	YES		hairy and enhancer of split 7	0	0	0	0	0	0	1	0	0	0	0	0	1	0	0	0	0	0	0	0	0	0	0	0	0	0	0.1078	-0.1894	0.0524667	0.00153333	-0.0119	0.000266667	-0.0395	-0.0757667	-0.545567	0.2055	-0.00343333	-	-
x	0	5318	transcription factor	NM_010420	Hesx1		Hesx1	YES	dorsal, transcriptional target of OTX2	homeo box gene expressed in ES cells	0	0	0	0	0	0	0	0	0	0	0	0	0	0	0	0	0	0	0	0	0	0	0	0	0	0	-0.0266667	0.4088	0.1179	1.19473	0.3633	0.115667	0.0685333	0.0562	0.227067	0.102633	0.389867	-	-
x	0	5067	Notch	NM_008235	Hes1					hairy and enhancer of split 1	0	0	0	0	0	0	0	0	0	0	0	0	0	1	0	0	0	0	0	0	0	0	0	0	0	1	0.0318	-1.5729	-1.2116	-2.38597	-2.35867	-2.53733	-1.18043	-1.61127	-1.52953	-1.97063	-1.6694	-	neg
x	0	5071	Notch	NM_010423	Hey1		Hey1	YES	Hesr1	hairy/enhancer-of-split related with YRPW motif	0	0	0	0	0	0	0	0	0	0	0	0	0	0	0	0	0	0	0	0	0	0	0	0	0	0	-1.35973	0.0758	-1.65993	-2.45943	0.0549667	-0.844433	0.423267	0.435667	0.198967	0.200867	0.144167	neg	-
x	0	5066	Notch	NM_008237	Hes3		Hes3	YES		hairy and enhancer of split 3	0	0	0	0	0	0	0	0	0	0	0	0	0	1	0	0	0	0	0	0	0	0	0	0	0	1	-0.0604667	0.306833	-0.431733	1.01107	0.1169	0.0663	-0.0292333	-0.2335	-0.0263667	0.249	0.00266667	-	-
x	0	5073	transcription factor	NM_013905	Heyl		Heyl	YES		Hairy-related transcription factor 3	0	0	0	0	0	0	0	0	0	0	0	0	0	0	0	0	0	0	0	0	0	0	0	0	0	0	-0.262233	0.557467	-0.375633	1.44843	0.2876	0.210533	0.0541667	-0.105633	0.254633	0.0986667	0.336033	-	pos
x	0	5069	Notch	NM_019479	Hes6					hairy and enhancer of split 6	0	0	0	0	0	0	0	0	0	0	0	0	0	1	0	0	0	0	0	0	0	0	0	0	0	1	0.200033	0.9273	0.3693	-1.11403	-0.121333	-0.238367	0.619	0.108133	-0.9224	-0.997133	0.135333	-	pos
x	0	5072	Notch	NM_013904	Hey2				Hesr2	hairy/enhancer-of-split related with YRPW motif	0	0	0	0	0	0	0	0	0	0	0	0	0	1	0	0	0	0	0	0	0	0	0	0	0	1	-1.01323	-0.796933	-0.9869	-0.810667	-0.195033	-0.1238	0.2448	0.907167	0.607567	0.244333	-0.763267	neg	neg
	0	7720		NM_010512	Igf1					Igf1	0	0	0	0	0	0	0	0	0	0	0	1	1	0	0	0	0	0	0	0	0	0	0	0	0	0	-0.317067	-0.180367	0.0594333	0.334567	-0.0784667	0.799633	-0.193067	-0.0163667	-0.362033	-0.0802	-0.0171667	-	-
x	0	7829	IGF	NM_010514	Igf2					insulin-like growth factor 2	0	0	0	0	0	0	0	0	0	0	0	0	0	0	0	0	0	0	0	0	0	0	0	0	0	0	-2.4978	2.97523	-1.67887	4.28677	3.60257	0.868033	1.41737	0.7969	2.5614	2.83457	1.30007	neg	pos
	0	3556		NM_010495	Id1					DNA-binding protein inhibitor ID-1 (Inhibitor of DNA binding 1).	0	0	0	0	0	0	0	0	0	0	0	0	0	1	0	0	0	0	0	0	0	0	0	0	0	1	-0.883467	-0.515833	-1.35937	-1.39687	-1.17097	-1.21627	-0.358233	-0.4993	-1.73507	-0.641067	0.1861	neg	neg
x	0	7833	IGF	NM_010515	Igf2r					insulin-like growth factor 2 receptor	0	0	0	0	0	0	0	0	0	0	0	0	0	0	0	0	0	0	0	0	0	0	0	0	0	0	0.377167	-0.406133	-0.240567	-1.21703	-0.698233	-0.490167	-0.3956	-0.447567	-1.12217	-0.837333	-1.1329	-	-
	0	7840	IGF	NM_008340	Igfals					insulin-like growth factor binding protein acid	0	0	0	0	0	0	0	0	0	0	0	0	0	0	0	0	0	0	0	0	0	0	0	0	0	0	-0.0661	-0.0218333	-0.209033	0.758033	-0.0348	0.076	0.0861333	-0.2218	-0.144033	0.0526333	-0.146667	-	-
	0	7835	IGF	NM_008342	Igfbp2		Igfbp2	YES		insulin-like growth factor binding protein 2	0	0	0	0	0	0	0	0	0	0	0	0	0	0	0	0	0	0	0	0	0	0	0	0	0	0	-1.4186	0.222967	-2.71387	-4.92503	-2.53283	-4.80077	-1.20243	-2.69793	-2.616	-2.18657	-3.9971	neg	-
x	0	7788		NM_010496	Id2		Id2	YES	dorsal	inhibitor of DNA binding 2	0	0	0	0	0	0	0	0	0	0	0	0	0	1	0	0	0	0	0	0	0	0	0	0	0	1	-1.02363	0.179033	0.2708	-0.396133	0.6996	0.897	0.1714	0.941867	-0.393067	0.4305	1.41943	neg	-
	0	7839	IGF	NM_008344	Igfbp6					insulin-like growth factor binding protein 6	0	0	0	0	0	0	0	0	0	0	0	0	0	0	0	0	0	0	0	0	0	0	0	0	0	0	0.2128	-0.240733	-0.0956333	-0.169367	0.0461	0.0765333	-0.0849333	-0.0538333	-0.398967	-0.0677667	-0.100067	-	-
x	0	8062	Notch	NM_010588	Jag2					jagged 2	0	0	0	0	0	0	0	0	0	0	0	0	0	0	0	0	0	1	0	0	0	0	0	0	0	1	-0.643933	-0.488933	-0.650033	-0.308567	-0.502133	0.6882	-0.387467	-0.533833	-1.41153	-0.233333	-1.2636	neg	-
x	0	8063		NM_026365	Jagn1		Jagn1	YES		jagunal homolog 1	0	0	0	0	0	0	0	0	0	0	0	0	0	0	0	0	0	0	0	0	0	0	0	0	0	0	0.4313	0.478233	0.229533	-2.04303	-0.378233	-0.441267	0.1473	-0.353433	-0.1998	-0.0407667	0.0140333	-	-
x	0	8847	transcription factor	NM_001025245	Mbp	NM_001025245		YES		Mbp	0	0	0	0	0	0	0	0	0	0	0	0	0	0	0	0	0	1	0	0	0	0	0	0	0	1	-1.74127	0.305767	-0.798667	1.0606	1.09323	2.08657	-0.0132	0.0514	-0.219667	1.57497	-0.470033	neg	-
	0	10611		NM_023893	Ng23					n/a	0	0	0	0	0	0	0	0	0	0	0	0	0	0	0	0	0	0	0	0	0	0	0	0	0	0	0.421533	-0.1052	0.169467	-0.143833	-0.104433	-0.258067	-0.195433	-0.265933	-0.380467	-0.169033	-0.279933	-	-
	0	11166	transcription factor	NM_009123	Nkx1-2		Nkx1-2	YES		NK1 transcription factor related locus 2	0	0	0	0	0	0	0	0	0	0	0	0	0	0	0	0	0	0	0	0	0	0	0	0	0	0	0.177767	0.421967	-0.1599	1.0545	0.2357	0.0507667	0.0842	-0.195567	0.0329	0.0377	0.2597	-	-
x	0	11167	transcription factor	NM_010919	Nkx2-2					NK2 transcription factor related locus 2	0	0	0	0	0	0	0	0	0	0	0	0	0	0	0	0	0	0	0	0	0	0	0	0	0	0	-1.91153	-0.387333	-1.8044	-1.06527	0.345233	-0.210567	0.9768	1.28387	0.208767	-0.853133	-0.1343	neg	-
	0	11169	transcription factor	NM_008700	Nkx2-5					NK2 transcription factor related locus 5	0	0	0	0	0	0	0	0	0	0	0	0	0	0	0	0	0	0	0	0	0	0	0	0	0	0	0.228667	-0.135967	0.0645667	-0.0879	-0.00563333	-0.0098	-0.0697667	-0.189867	-0.4106	-0.00703333	-0.0744333	-	-
	0	11170	transcription factor	NM_010920	Nkx2-6					NK2 transcription factor related locus 6	0	0	0	0	0	0	0	0	0	0	0	0	0	0	0	0	0	0	0	1	0	0	0	0	0	1	0.0564	0.0554333	0.0518333	0.430533	0.1542	-0.0743	0.00253333	-0.0104333	-0.184533	0.0994	0.0438	-	-
	0	11171	transcription factor	NM_008701	Nkx2-9					NK2 transcription factor related locus 9	0	0	0	0	0	0	0	0	0	0	0	0	0	0	0	0	0	0	0	0	0	0	0	0	0	0	0.217467	-0.0708667	0.0843333	0.0543667	0.0229	-0.0512333	0.072	-0.118433	-0.386433	-0.00256667	-0.150567	-	-
	0	11172	transcription factor	NM_010921	Nkx3-1					NK-3 transcription factor locus 1	0	0	0	0	0	0	0	0	0	0	0	0	0	0	0	0	0	0	0	0	0	0	0	0	0	0	-0.3289	0.4127	-0.403367	0.9245	0.7151	0.143233	0.1879	0.0824	0.0948333	0.0847667	0.248233	-	-
	0	11173	transcription factor	NM_183248	Nkx6-2		Nkx6-2	YES		NK6 transcription factor related locus 2	0	1	0	0	0	0	0	0	0	0	0	0	1	0	0	0	1	0	0	0	0	0	0	0	0	1	0.0820667	-0.0701667	1.1536	0.531033	0.838	1.2083	-0.0201333	-0.0399333	0.8814	1.7333	0.212067	-	-
x	0	9256	transcription factor	NM_008666	Myt1l					Myelin transcription factor 1-like protein (MyT1L protein) (Postmitotic neural gene 1 protein) (Zinc finger protein Png-1) (Neural zinc finger factor 1) (NZF-1).	1	0	0	0	0	0	0	0	0	0	0	0	1	1	0	0	0	0	0	0	0	0	0	0	0	1	-0.3748	-1.87397	0.513933	-1.0882	-1.00917	1.54543	-1.10207	0.210733	-2.1073	-0.871833	-2.89673	-	neg
x	0	11267	Notch	NM_008714	Notch1					Notch gene homolog 1	0	0	0	0	0	0	0	0	0	0	0	0	0	0	0	0	0	0	0	0	0	0	0	0	0	0	1.14913	0.497567	1.22313	-2.7802	-0.278233	-0.680267	0.422033	0.231033	0.384633	-0.5463	0.6549	pos	-
x	0	9379	Notch	NM_010928	Notch2					n/a	0	0	0	1	0	0	0	0	0	0	0	1	2	0	0	0	0	0	0	0	0	0	0	0	0	0	0.144633	0.0259333	0.4024	1.72083	0.114633	1.28583	0.839867	0.0287333	-0.353367	1.94633	1.43467	-	-
x	0	11268	Notch	NM_008716	Notch3		Notch3	YES		Notch gene homolog 3	0	0	0	0	0	0	0	0	0	0	0	0	0	0	0	0	0	0	0	0	0	0	0	0	0	0	0.238867	0.214533	-0.135033	-2.11207	-0.229433	-0.423067	0.574667	0.0459667	0.484633	0.462533	-0.2374	-	-
x	0	11269	Notch	NM_010929	Notch4		Notch4	YES		Notch gene homolog 4	0	0	0	0	0	0	0	0	0	0	0	0	0	0	0	0	0	0	0	0	0	0	0	0	0	0	0.283433	-0.149467	0.00183333	1.25943	-0.100533	-0.0236333	0.0742	-0.192633	-0.234967	0.0605667	-0.00913333	-	-
	0	1889	BMP	NM_007555	Bmp5	NM_007555		YES		bone morphogenetic protein 5	0	0	0	1	0	0	0	0	0	0	0	0	1	0	0	0	0	1	0	1	0	0	0	0	0	2	0.137967	-0.557067	-0.3142	0.0932	-0.486767	-0.463267	-0.6628	-0.524467	-0.377167	-0.6467	-0.1676	-	neg
	0	3050	cell cycle	NM_001033443	Cdkl4					cyclin-dependent kinase-like 4	0	0	0	0	0	0	0	0	0	0	0	0	0	0	0	0	0	1	0	1	0	0	0	0	0	2	0.112567	-0.0355	0.1078	0.534233	0.275233	0.566633	-0.0843	-0.0496333	-0.186267	0.7088	-0.0418333	-	-
x	0	11783	transcription factor	NM_016968	Olig1		Olig1	YES		oligodendrocyte transcription factor 1	0	0	0	0	0	0	0	0	0	0	0	0	0	0	0	0	0	0	0	0	0	0	0	0	0	0	1.944	-0.3895	1.6327	-3.96747	-1.45587	-2.0989	0.385167	-0.754	-1.49953	-1.6391	-0.609967	pos	-
	0	11939		NM_011037	Pax2	NM_011037		YES		paired box gene 2	0	0	0	0	0	0	0	0	0	0	0	0	0	0	0	0	0	0	0	0	0	0	0	0	0	0	0.275167	0.4474	0.0361667	1.50127	0.0510667	0.148567	0.228967	-0.270933	-0.186433	0.0746333	0.0151333	-	-
	0	526		NM_008781	Pax3					9.5 days embryo parthenogenote cDNA RIKEN full-length enriched library clone:B130017N14 product:paired box gene 3 full insert sequence (Pax3 protein).	0	0	0	0	0	0	0	0	0	0	0	0	0	0	0	0	0	0	0	0	0	0	0	0	0	0	-0.295967	0.6816	-0.2774	1.53573	0.910967	0.1007	0.2525	0.382367	0.5507	0.0894333	0.1985	-	pos
	0	11940		NM_011038	Pax4		Pax4	YES	ARX target	paired box gene 4	0	0	0	0	0	0	0	0	0	0	0	0	0	0	0	0	0	0	0	0	0	0	0	0	0	0	-0.164867	0.6229	-0.133867	1.24737	0.3989	0.0576	0.212133	-0.0494667	0.2922	0.158767	0.132167	-	pos
x	0	11941		NM_013627	Pax6		Pax6	YES	dorsal	paired box gene 6	0	0	0	0	0	0	0	0	0	0	0	0	0	0	0	0	0	0	0	0	0	0	0	0	0	0	0.0144333	-1.00737	0.434167	-1.44983	-0.130733	0.5193	0.1207	0.631633	0.455333	0.628767	1.03493	-	neg
	0	11943		NM_011040	Pax8		Pax8	YES		paired box gene 8	0	0	0	0	0	0	0	0	0	0	0	0	0	0	0	1	0	0	0	0	0	0	0	0	0	1	-0.460467	0.489133	-0.867033	1.3846	0.547067	-0.407967	-0.1998	-0.2732	-0.0897	-0.354167	-0.178433	-	-
	0	11944		NM_011041	Pax9					paired box gene 9	0	0	0	0	0	0	0	0	0	0	0	0	0	0	0	0	0	0	0	0	0	0	0	0	0	0	-0.2541	0.407867	-0.0847	1.6709	0.8481	-0.0754333	0.0299667	0.434233	0.5569	0.185867	0.460233	-	-
	0	12009	transcription factor	NM_018878	Paxip1		Paxip1	YES		Pax transcription activation domain interacting	0	0	0	0	0	0	0	0	0	0	0	0	0	0	0	0	0	0	0	0	0	0	0	0	0	0	0.447833	-0.3368	0.217133	-0.155933	-0.247567	-0.0717	-0.1726	-0.2791	-0.3509	-0.358033	-0.143467	-	-
	0	12361	PDGF	NM_011058	Pdgfra	NM_011058		YES		platelet derived growth factor receptor alpha	0	0	0	0	0	0	0	0	0	0	0	0	0	0	0	0	0	0	0	0	0	0	0	0	0	0	-0.228933	-1.4318	-0.0259	-2.1768	-0.2599	0.268233	0.6427	0.9421	0.593733	-0.338833	-0.7035	-	neg
x	0	9254		NM_011123	Plp1		Plp1	YES		Myelin proteolipid protein (PLP) (Lipophilin).	0	0	0	0	0	0	0	0	0	0	0	0	0	0	0	0	0	0	0	0	0	0	0	0	0	0	-0.572367	-1.21473	5.07	-0.114267	3.9387	4.8715	-0.0887667	2.64283	5.26923	5.193	2.00707	neg	neg
x	0	13006		NM_019755	Plp2		Plp2	YES		proteolipid protein 2	0	0	0	0	0	0	0	0	0	0	0	0	0	0	0	0	0	0	0	0	0	0	0	0	0	0	-0.316467	0.783933	-1.31523	-0.2494	-0.564567	-1.67357	-1.0988	-1.99237	-2.03113	-1.22647	-1.4105	-	pos
x	0	14840	transcription factor	NM_009233	Sox1		Sox1	YES		SRY (sex determining region Y)-box 1	0	0	0	0	0	0	0	0	0	0	0	0	0	0	0	0	0	0	0	0	0	0	0	0	0	0	0.334033	-0.901333	0.431633	-0.7054	-0.749567	0.0585333	-0.0805	-0.2425	-0.9609	-0.476067	-0.401967	-	neg
x	0	14688	transcription factor	NM_011439	Sox13					SOX-13 protein.	0	0	0	0	0	0	0	0	0	0	0	0	0	0	0	0	0	0	0	0	0	0	0	0	0	0	0.779233	-0.834033	0.229633	-1.25107	-0.8117	-0.282533	-0.351967	-0.930933	-1.06963	-0.242967	-0.3529	pos	neg
x	0	14689	transcription factor	NM_009235	Sox15		Sox15	YES		SOX-15 protein.	0	0	0	0	0	0	0	0	0	0	0	0	0	0	0	0	0	0	0	0	0	0	0	0	0	0	0.1025	-0.2558	-0.0906667	0.2418	-0.1856	-0.1611	-0.00386667	-0.144767	-0.400033	-0.290433	-0.1485	-	-
x	0	14844	transcription factor	NM_011441	Sox17					SRY-box 17	0	0	0	0	0	0	0	0	0	0	0	0	0	0	0	0	0	0	0	0	0	0	0	0	0	0	0.345733	0.1206	-0.0616333	0.419633	0.0071	-0.1836	0.0745667	-0.0707333	-0.190567	-0.0899667	0.155367	-	-
x	0	15588	transcription factor	NM_009236	Sox18					Transcription factor SOX-18.	0	0	0	0	0	0	0	0	0	0	0	0	0	0	0	0	0	0	0	0	0	0	0	0	0	0	0.2294	-0.265233	0.0339333	0.005	-0.225233	-0.1903	-0.0436	-0.0835	-0.295033	-0.330567	-0.1506	-	-
x	0	10171	transcription factor	NM_145464	Sox21					n/a	0	0	0	0	0	0	0	0	0	0	0	0	0	0	0	0	0	0	0	0	0	0	0	0	0	0	0.587233	0.149733	0.958367	-0.583633	0.845233	0.7973	1.1711	0.998567	0.919367	0.618233	1.03573	pos	-
x	0	14842	transcription factor	NM_011444	Sox5	NM_011444		YES	dorsal	SRY (sex determining region Y)-box 5	0	0	1	0	0	0	0	0	0	0	0	0	1	0	0	0	0	0	0	0	0	0	0	0	0	0	-0.3817	-1.32077	-0.866367	-0.998733	-1.36477	-0.0623667	-0.0373333	-0.685567	-1.24247	-0.714	-0.8191	-	neg
x	0	14690	transcription factor	NM_001025560	Sox6		Sox6	YES		Sox6	0	0	0	0	0	0	0	0	0	0	0	0	0	0	0	0	0	0	0	0	0	0	0	0	0	0	0.144	-1.66373	0.3669	-2.6578	-0.4858	-0.1546	0.582967	1.1844	0.635767	-0.00976667	0.178067	-	neg
x	0	14845	transcription factor	NM_011446	Sox7					SRY-box 7	0	0	0	0	0	0	0	0	0	0	0	0	0	0	0	0	0	0	0	0	0	0	0	0	0	0	0.167233	-0.269933	-0.264	-0.147233	-0.317767	-0.304	-0.2318	-0.343933	-0.418333	-0.540967	-0.377233	-	-
x	0	14849	transcription factor	NM_011448	Sox9				SoxE gene	SRY-box containing gene 9	0	0	0	0	0	0	0	0	0	0	0	0	0	0	0	0	0	0	0	0	0	0	0	0	0	0	-0.668333	0.4649	-0.380967	1.2092	1.1521	-0.4299	0.798567	1.21097	1.69787	0.765067	1.26893	neg	-
	0	15560	transcription factor	NM_009327	Tcf1	NM_009327		YES		transcription factor 1	0	0	0	0	0	0	0	0	0	0	0	0	0	0	0	0	0	0	0	0	0	0	0	0	0	0	0.2209	0.0056	0.249233	-0.195767	-0.0869333	0.1604	0.464133	0.146767	-0.282367	0.293533	-0.0255667	-	-
	0	15562	transcription factor	NM_009328	Tcf15		Tcf15	YES		transcription factor 15	0	0	0	0	0	0	0	0	0	0	0	0	0	0	0	0	0	0	0	0	0	0	0	0	0	0	0.202033	-0.287133	-0.124533	0.0379333	-0.0605667	-0.137967	-0.120867	-0.287033	-0.5714	-0.139567	-0.2728	-	-
	0	15564	transcription factor	NM_013836	Tcf20	NM_013836	Tcf20	YES		transcription factor 20	0	0	0	0	0	0	0	0	0	0	0	0	0	0	0	0	0	0	0	0	0	0	0	0	0	0	0.0492667	-1.65483	0.553667	-0.1087	-0.484233	0.8885	0.00803333	0.0135	-0.733933	0.482533	-0.0765	-	neg
	0	15566	transcription factor	NM_053085	Tcf23	NM_053085	Tcf23	YES		transcription factor 23	0	0	0	0	0	0	0	0	0	0	0	0	0	0	0	0	0	0	0	0	0	0	0	0	0	0	-0.244733	0.4718	-0.3225	1.16727	0.282633	-0.0132	0.2576	0.0705333	0.2449	0.0008	0.1751	-	-
	0	121	T cell	NM_009333	Tcf7l2	NM_009333		YES		10 days neonate skin cDNA RIKEN full-length enriched library clone:4732431J15 product:transcription factor 7-like 2 T-cell specific HMG-box full insert sequence.	0	0	0	0	0	0	0	0	0	0	0	0	0	0	0	0	0	0	0	0	0	0	0	0	0	0	-0.777333	-0.557233	-0.405833	-1.25967	0.394267	0.4369	0.3198	0.9654	1.1111	0.3087	0.584333	neg	neg
	0	15571	transcription factor	NM_011547	Tcfap2a		Tcfap2a	YES		transcription factor AP-2 alpha	0	0	0	0	0	0	0	0	0	0	0	0	0	0	0	0	0	0	0	0	0	0	0	0	0	0	0.186033	0.605967	-0.0186667	1.0616	0.6614	-0.0852333	0.0208	-0.0999333	-0.317867	0.154767	0.111333	-	pos
	0	15231		NM_001025305	Tcfap2b	NM_001025305		YES		Tcfap2b	0	0	0	0	0	0	0	0	0	0	0	0	0	0	0	0	0	0	0	0	0	0	0	0	0	0	-0.0064	0.8116	0.0192	2.1721	0.805533	-0.0852667	0.1813	0.369867	0.537067	0.187933	0.803467	-	pos
	0	1825	transcription factor	NM_009335	Tcfap2c		Tcfap2c	YES		Blastocyst blastocyst cDNA RIKEN full-length enriched library clone:I1C0020M08 product:transcription factor AP-2 gamma full insert sequence.	0	0	0	1	0	0	0	0	0	0	0	0	1	0	0	0	0	0	0	0	0	0	0	0	0	0	-0.7215	0.713167	-0.682167	2.26937	1.04497	0.0972	0.0339	0.0784	0.0618333	-0.248633	0.0150333	neg	pos
	0	15573	transcription factor	NM_198960	Tcfap2e		Tcfap2e	YES		transcription factor AP-2 epsilon	0	0	0	0	0	0	0	0	0	0	0	0	0	0	0	0	0	0	0	0	0	0	0	0	0	0	0.0388333	-0.0041	-0.2934	0.0511333	-0.0901333	-0.0278333	0.0141	-0.210067	-0.4948	-0.191167	-0.363167	-	-
	0	15574	transcription factor	NM_031182	Tcfap4					transcription factor AP-4 (activating	0	0	0	1	0	0	0	0	0	0	0	0	1	0	0	0	0	0	0	0	0	0	0	0	0	0	-0.4165	-0.137633	-1.07313	-1.7183	-1.13857	0.397633	0.1103	-0.567733	-1.82647	-0.800633	-0.480633	-	-
	0	8877	transcription factor	NM_033476	Tcfcp2		Tcfcp2	YES		Melanocyte cDNA RIKEN full-length enriched library clone:G270085N22 product:transcription factor CP2 full insert sequence.	0	0	0	0	0	0	0	0	0	0	0	0	0	0	0	0	0	0	0	0	0	0	0	0	0	0	-0.0256667	-0.0610667	0.261867	-1.9788	-0.0187333	0.293433	0.605667	0.424767	0.0441333	0.754133	0.316667	-	-
	0	936	transcription factor	NM_023755	Tcfcp2l1					Adult male kidney cDNA RIKEN full-length enriched library clone:F530007A16 product:transcription factor CP2-like 1 full insert sequence.	0	0	0	0	0	0	0	0	0	0	0	0	0	0	0	0	0	0	0	0	0	0	0	0	0	0	-0.181467	0.563667	0.8718	1.43893	1.5284	1.1032	0.264133	0.393667	1.78327	3.8382	3.25333	-	pos
	0	1874	transcription factor	NM_172472	Tcfe3		Tcfe3	YES		Bone marrow macrophage cDNA RIKEN full-length enriched library clone:I830055K06 product:transcription factor E3 full insert sequence.	0	0	0	0	0	0	0	0	0	0	0	0	0	0	0	0	0	0	0	0	0	0	0	0	0	0	-0.0901	0.794733	-0.380367	-1.75097	0.309067	0.123433	0.625867	-0.137367	0.0589667	0.6211	0.4231	-	pos
	0	15582	transcription factor	NM_011549	Tcfeb		Tcfeb	YES		transcription factor EB	0	0	0	0	0	0	0	0	0	0	0	0	0	0	0	0	0	0	0	0	0	0	0	0	0	0	-0.571967	0.7172	-0.495967	-1.64023	-0.0565	-0.0392333	0.0308667	-0.482733	-0.160833	0.690367	0.262167	neg	pos
	0	15583	transcription factor	NM_031198	Tcfec					transcription factor EC	0	0	0	0	0	0	0	0	0	0	0	0	0	0	0	0	0	0	0	0	0	0	0	0	0	0	-0.0551333	0.372267	0.457833	0.950167	0.362967	-0.0593667	0.231033	0.2361	0.322067	0.0500667	0.456467	-	-
	0	15232		NM_178254	Tcfl5					Tcfl5 protein.	0	0	0	0	0	0	1	0	0	0	0	0	1	0	0	0	0	0	0	0	0	0	0	0	0	0	-0.00473333	-0.880367	-0.679567	-0.867167	-0.680867	-0.4267	-0.603633	-0.6494	-1.20343	-0.901367	-0.7359	-	neg
	0	15567	transcription factor	NM_009332	Tcf3				E47	transcription factor 3	0	0	0	0	0	0	0	0	0	0	0	0	0	1	0	0	0	0	0	0	0	0	0	0	0	1	-0.0829	0.888867	0.142533	-0.914033	1.04197	0.429	1.14747	0.2815	1.2664	1.479	0.919	-	pos
x	0	15425	receptor other	NM_009380	Thrb	NM_009380		YES		thyroid hormone receptor beta	0	0	0	0	0	0	0	0	0	0	0	0	0	0	0	0	0	0	0	0	0	0	0	0	0	0	0.1025	0.0376	0.0632333	0.310367	0.0838333	0.0002	-0.0185	-0.0501	0.0616667	-0.0206333	0.187367	-	-
	0	15428		NM_009381	Thrsp					thyroid hormone-responsive protein	0	0	0	0	0	0	0	0	0	0	0	0	0	0	0	0	0	0	0	0	0	0	0	0	0	0	-1.9552	1.03387	-1.31643	0.1543	2.21977	0.4567	0.190667	0.631433	1.5603	1.09613	1.54683	neg	pos
x	0	15422	receptor other	NM_178060	Thra					Thyroid hormone receptor alpha (C-erbA-alpha) (c-erbA-1).	0	0	0	0	0	0	0	0	0	0	0	0	0	1	0	0	0	0	0	0	0	0	0	0	0	1	-0.246433	-1.04987	0.252933	-1.33753	-0.921	0.789333	-0.1905	-0.417367	-1.09813	-0.0773667	-0.0838667	-	neg
	0	15386	receptor other	NM_011869	Thrap4					Thrap4 protein (NOD-derived CD11c #NAME? dendritic cells cDNA RIKEN full-length enriched library clone:F630101H14 product:thyroid hormone receptor associated protein 4 full insert sequence).	0	0	0	0	0	0	0	0	0	0	0	0	0	1	0	0	0	0	0	0	0	0	0	0	0	1	1.28603	0.1188	1.04547	-2.2079	-0.0989	0.432433	0.637533	-0.391767	-0.7461	0.659267	0.433533	pos	-
x	0	16681	transcription factor	NM_009537	Yy1	NM_009537		YES		YY1 transcription factor	0	0	0	0	0	0	0	0	0	0	0	0	0	0	0	0	0	0	0	0	0	0	0	0	0	0	-0.338333	-0.9092	-0.3776	-1.14957	-0.6805	-0.508367	-0.2783	0.153	0.1486	-0.5875	-0.491133	-	neg
					ccnd
[truncated: 9 more columns]
